# Supplementary material for: Exploring the Mitochondrial Degradome by the TAILS Proteomics Approach in a Cellular Model of Parkinson’s Disease
Source: Front Aging Neurosci. 2019 Jul 31;11:195. doi: 10.3389/fnagi.2019.00195 (PMC6685049; doi:10.3389/fnagi.2019.00195)
Supplement: Supplementary file 5 [file Table_5.xlsx]

## Sheet: Full_Table
Supplementary Table S5. TopFINDer search of N-term peptides belonging to mitochondrial proteins identified in POSTsel (n=479).
Accession	Input Sequence	Protein found	Recommended Protein Name	Other Names and IDs	Species	Chromosome	P10 to P1	P1' to P10'	P1' Position	Full protein length (aa)	Expected start (pos 1,2, or after signal-, pro-, or transit-peptide)	UniProt curated start	Alternative Spliced Start	Cleaving proteases	Other experimental terminus evidences	Alternative Translation Start	N-terminal Features (Start to P1)	Features spanning terminus (P1 to P1')	C-terminal Features (P1' to End)	Distance To signal peptide	Distance to propeptide lost	Distance to last transmembrane domain (shed)	Distance to transit peptide (mitochondria)
O00217	TYKYVNMQDPEMDMKSVTDR	YES	NADH dehydrogenase [ubiquinone] iron-sulfur protein 8, mitochondrial	NDUFS8;NADH dehydrogenase [ubiquinone] iron-sulfur protein 8, mitochondrial;Complex I-23kD Short=CI-23kD ;NADH-ubiquinone oxidoreductase 23 kDa subunit ;TYKY subunit;NDUS8;	(Human)	11	RSLHSSAVAA	TYKYVNMQDP	35	210	X	X			unknown;Subtiligase Based Positive Selection		TRANSIT (Mitochondrion (By similarity).)		CHAIN (NADH dehydrogenase [ubiquinone] iron- sulfur protein 8, mitochondrial.);METAL (Iron-sulfur 1 (4Fe-4S) (By similarity).);METAL (Iron-sulfur 2 (4Fe-4S) (By similarity).);DOMAIN (4Fe-4S ferredoxin-type 1.);DOMAIN (4Fe-4S ferredoxin-type 2.)				0
O00746	GSGGPSWTR	YES	Nucleoside diphosphate kinase, mitochondrial	NME4;Nucleoside diphosphate kinase, mitochondrial;Nucleoside diphosphate kinase D Short=NDPKD ;nm23-H4;NDKM;	(Human)	16	APGPSLLVRH	GSGGPSWTRE	29	187					Subtiligase Based Positive Selection;unknown			TRANSIT (Mitochondrion (Potential).)	CHAIN (Nucleoside diphosphate kinase, mitochondrial.);BINDING (ATP (By similarity).);ACT_SITE (Pros-phosphohistidine intermediate (By similarity).)				-5
O14521	SGSKAASLHWTSER	YES	Succinate dehydrogenase [ubiquinone] cytochrome b small subunit, mitochondrial	SDHD;Succinate dehydrogenase [ubiquinone] cytochrome b small subunit, mitochondrial;CII-4 ;QPs3 ;Succinate dehydrogenase complex subunit D ;Succinate-ubiquinone oxidoreductase cytochrome b small subunit ;Succinate-ubiquinone reductase membrane anchor subunit;DHSD;	(Human)	11	QHIHLSPSHH	SGSKAASLHW	57	159	X	X					TRANSIT (Mitochondrion (Potential).)		TOPO_DOM (Mitochondrial matrix (By similarity).);TOPO_DOM (Mitochondrial intermembrane (By similarity).);CHAIN (Succinate dehydrogenase [ubiquinone] cytochrome b small subunit, mitochondrial.);METAL (Iron (heme axial ligand); shared with SDHC (By similarity).);TRANSMEM (Helical; (By similarity).);BINDING (Ubiquinone; shared with IP/SDHB (By similarity).)			-29	0
O14561	QYSDMPPLTLEGIQDR	YES	Acyl carrier protein, mitochondrial	NDUFAB1;Acyl carrier protein, mitochondrial;CI-SDAP ;NADH-ubiquinone oxidoreductase 9.6 kDa subunit;ACPM;	(Human)	16	VPGRVTQLCR	QYSDMPPLTL	67	156	X	X			Subtiligase Based Positive Selection;unknown			TRANSIT (Mitochondrion.)	MOD_RES (N6-acetyllysine (By similarity).);MOD_RES (O-(pantetheine 4'-phosphoryl)serine (Potential).);CHAIN (Acyl carrier protein, mitochondrial.)				-2
O14874	STSATDTHHVEMAR	YES	[3-methyl-2-oxobutanoate dehydrogenase [lipoamide]] kinase, mitochondrial	BCKDK;[3-methyl-2-oxobutanoate dehydrogenase [lipoamide]] kinase, mitochondrial;Branched-chain alpha-ketoacid dehydrogenase kinase Short=BCKD-kinase Short=BCKDHKIN;BCKD;	(Human)	16	LGPALALRAR	STSATDTHHV	31	412	X	X			Subtiligase Based Positive Selection;unknown		TRANSIT (Mitochondrion (By similarity).)		DOMAIN (Histidine kinase.);MOD_RES (Phosphoserine; by autocatalysis (By similarity).);MOD_RES (N6-acetyllysine.);CHAIN ([3-methyl-2-oxobutanoate dehydrogenase [lipoamide]] kinase, mitochondrial.)				0
O43464	AVPSPPPASPR	YES	Serine protease HTRA2, mitochondrial	HTRA2;Serine protease HTRA2, mitochondrial;High temperature requirement protein A2 Short=HtrA2 ;Omi stress-regulated endoprotease ;Serine protease 25 ;Serine proteinase OMI;HTRA2;S01.278	(Human)	2	GGRGPPAVLA	AVPSPPPASP	134	458	X	X		HTRA2	Subtiligase Based Positive Selection;unknown		TRANSMEM (Helical; (Potential).);TRANSIT (Mitochondrion.);PROPEP ()		CHAIN (Serine protease HTRA2, mitochondrial.);MOTIF (IAP-binding motif.);REGION (Serine protease.);ACT_SITE (Charge relay system.);DOMAIN (PDZ.);MUTAGEN (A->M: Loss of interaction with XIAP. Loss of inhibition of XIAP activity.);MUTAGEN (S->A: Loss of protease activity.)		0	8	102
O43464	VLLLLWGGGRGPPAVLAAVPSPPPASPR	YES	Serine protease HTRA2, mitochondrial	HTRA2;Serine protease HTRA2, mitochondrial;High temperature requirement protein A2 Short=HtrA2 ;Omi stress-regulated endoprotease ;Serine protease 25 ;Serine proteinase OMI;HTRA2;S01.278	(Human)	2	LAVALGAGGA	VLLLLWGGGR	117	458					Subtiligase Based Positive Selection		TRANSIT (Mitochondrion.)	TRANSMEM (Helical; (Potential).);PROPEP ()	CHAIN (Serine protease HTRA2, mitochondrial.);MOTIF (IAP-binding motif.);REGION (Serine protease.);ACT_SITE (Charge relay system.);DOMAIN (PDZ.);MUTAGEN (A->M: Loss of interaction with XIAP. Loss of inhibition of XIAP activity.);MUTAGEN (S->A: Loss of protease activity.)		-17	-9	85
O43819	SRQGPAETGGQGQPQGPGLR	YES	Protein SCO2 homolog, mitochondrial	SCO2;Protein SCO2 homolog, mitochondrial;SCO2;	(Human)	22	QALHLRSWLL	SRQGPAETGG	39	266	X	X						TRANSIT (Mitochondrion (Potential).)	METAL (Copper.);DOMAIN (Thioredoxin.);CHAIN (Protein SCO2 homolog, mitochondrial.)				-3
O75127	SSSSSQLPLGQER	YES	Pentatricopeptide repeat-containing protein 1, mitochondrial	PTCD1;Pentatricopeptide repeat-containing protein 1, mitochondrial;PTCD1;	(Human)	7	GLMRPMWAPF	SSSSSQLPLG	47	700					Subtiligase Based Positive Selection;unknown			CHAIN (Pentatricopeptide repeat-containing protein 1, mitochondrial.)	REPEAT (PPR 1.);REPEAT (PPR 2.);REPEAT (PPR 3.);REPEAT (PPR 4.);REPEAT (PPR 5.);REPEAT (PPR 6.);REPEAT (PPR 7.);REPEAT (PPR 8.);REPEAT (PPR 9.)
O75251	VHQSVATDGPSSTQPALPKAR	YES	NADH dehydrogenase [ubiquinone] iron-sulfur protein 7, mitochondrial	NDUFS7;NADH dehydrogenase [ubiquinone] iron-sulfur protein 7, mitochondrial;Complex I-20kD Short=CI-20kD ;NADH-ubiquinone oxidoreductase 20 kDa subunit ;PSST subunit;NDUS7;	(Human)	19	SVGPAVQARG	VHQSVATDGP	30	213					Subtiligase Based Positive Selection;unknown			TRANSIT (Mitochondrion (By similarity).)	CHAIN (NADH dehydrogenase [ubiquinone] iron- sulfur protein 7, mitochondrial.);METAL (Iron-sulfur (4Fe-4S) (Potential).)				-9
O75390	SQLSAAVTALNSESNFAR	YES	Citrate synthase, mitochondrial	CS;Citrate synthase, mitochondrial;Citrate (Si)-synthase;CISY;	(Human)	12	DNFPTNLHPM	SQLSAAVTAL	166	466							MOD_RES (N6-succinyllysine (By similarity).);MOD_RES (N6-acetyllysine; alternate (By similarity).);MOD_RES (N6-succinyllysine; alternate (By similarity).);TRANSIT (Mitochondrion.)	CHAIN (Citrate synthase, mitochondrial.)	MOD_RES (N6-succinyllysine (By similarity).);MOD_RES (N6-acetyllysine; alternate (By similarity).);MOD_RES (N6-succinyllysine; alternate (By similarity).);MOD_RES (N6-acetyllysine; alternate.);MOD_RES (N6-acetyllysine.);MOD_RES (N6,N6,N6-trimethyllysine (By similarity).);ACT_SITE (By similarity.)				138
O75439	AETIR	YES	Mitochondrial-processing peptidase subunit beta	PMPCB;Mitochondrial-processing peptidase subunit beta;Beta-MPP ;P-52;MPPB;M16.003	(Human)	7	ELEARIDAVN	AETIREVCTK	447	489							METAL (Zinc (By similarity).);TRANSIT (Mitochondrion.);ACT_SITE (Proton acceptor (By similarity).)	CHAIN (Mitochondrial-processing peptidase subunit beta.)					401
O75439	ESGLR	YES	Mitochondrial-processing peptidase subunit beta	PMPCB;Mitochondrial-processing peptidase subunit beta;Beta-MPP ;P-52;MPPB;M16.003	(Human)	7	NVPETRVTCL	ESGLRVASED	64	489							TRANSIT (Mitochondrion.)	CHAIN (Mitochondrial-processing peptidase subunit beta.)	METAL (Zinc (By similarity).);ACT_SITE (Proton acceptor (By similarity).)				18
O75439	FGENRLRSTQAATQVVLNVPETR	YES	Mitochondrial-processing peptidase subunit beta	PMPCB;Mitochondrial-processing peptidase subunit beta;Beta-MPP ;P-52;MPPB;M16.003	(Human)	7	IRGAAGRSLY	FGENRLRSTQ	37	489								TRANSIT (Mitochondrion.)	CHAIN (Mitochondrial-processing peptidase subunit beta.);METAL (Zinc (By similarity).);ACT_SITE (Proton acceptor (By similarity).)				-9
O75439	IPIPELEAR	YES	Mitochondrial-processing peptidase subunit beta	PMPCB;Mitochondrial-processing peptidase subunit beta;Beta-MPP ;P-52;MPPB;M16.003	(Human)	7	GRQMLCYNRR	IPIPELEARI	433	489							METAL (Zinc (By similarity).);TRANSIT (Mitochondrion.);ACT_SITE (Proton acceptor (By similarity).)	CHAIN (Mitochondrial-processing peptidase subunit beta.)					387
O75439	QVVLNVPETR	YES	Mitochondrial-processing peptidase subunit beta	PMPCB;Mitochondrial-processing peptidase subunit beta;Beta-MPP ;P-52;MPPB;M16.003	(Human)	7	NRLRSTQAAT	QVVLNVPETR	50	489					Subtiligase Based Positive Selection		TRANSIT (Mitochondrion.)	CHAIN (Mitochondrial-processing peptidase subunit beta.)	METAL (Zinc (By similarity).);ACT_SITE (Proton acceptor (By similarity).)				4
O75439	STQAATQVVL	YES	Mitochondrial-processing peptidase subunit beta	PMPCB;Mitochondrial-processing peptidase subunit beta;Beta-MPP ;P-52;MPPB;M16.003	(Human)	7	SLYFGENRLR	STQAATQVVL	44	489	X	X			unknown;Subtiligase Based Positive Selection			TRANSIT (Mitochondrion.)	CHAIN (Mitochondrial-processing peptidase subunit beta.);METAL (Zinc (By similarity).);ACT_SITE (Proton acceptor (By similarity).)				-2
O75439	STQAATQVVLNVPETR	YES	Mitochondrial-processing peptidase subunit beta	PMPCB;Mitochondrial-processing peptidase subunit beta;Beta-MPP ;P-52;MPPB;M16.003	(Human)	7	SLYFGENRLR	STQAATQVVL	44	489	X	X			unknown;Subtiligase Based Positive Selection			TRANSIT (Mitochondrion.)	CHAIN (Mitochondrial-processing peptidase subunit beta.);METAL (Zinc (By similarity).);ACT_SITE (Proton acceptor (By similarity).)				-2
O75489	ESAGADTRPTVR	YES	NADH dehydrogenase [ubiquinone] iron-sulfur protein 3, mitochondrial	NDUFS3;NADH dehydrogenase [ubiquinone] iron-sulfur protein 3, mitochondrial;Complex I-30kD Short=CI-30kD ;NADH-ubiquinone oxidoreductase 30 kDa subunit;NDUS3;	(Human)	11	PSVLLLPVRR	ESAGADTRPT	37	264	X	X			Subtiligase Based Positive Selection		TRANSIT (Mitochondrion.)		CHAIN (NADH dehydrogenase [ubiquinone] iron- sulfur protein 3, mitochondrial.)				0
O75489	ESAGADTRPTVRPR	YES	NADH dehydrogenase [ubiquinone] iron-sulfur protein 3, mitochondrial	NDUFS3;NADH dehydrogenase [ubiquinone] iron-sulfur protein 3, mitochondrial;Complex I-30kD Short=CI-30kD ;NADH-ubiquinone oxidoreductase 30 kDa subunit;NDUS3;	(Human)	11	PSVLLLPVRR	ESAGADTRPT	37	264	X	X			Subtiligase Based Positive Selection		TRANSIT (Mitochondrion.)		CHAIN (NADH dehydrogenase [ubiquinone] iron- sulfur protein 3, mitochondrial.)				0
O75489	RESAGADTRPTVRP	YES	NADH dehydrogenase [ubiquinone] iron-sulfur protein 3, mitochondrial	NDUFS3;NADH dehydrogenase [ubiquinone] iron-sulfur protein 3, mitochondrial;Complex I-30kD Short=CI-30kD ;NADH-ubiquinone oxidoreductase 30 kDa subunit;NDUS3;	(Human)	11	RPSVLLLPVR	RESAGADTRP	36	264	X	X			Subtiligase Based Positive Selection			TRANSIT (Mitochondrion.)	CHAIN (NADH dehydrogenase [ubiquinone] iron- sulfur protein 3, mitochondrial.)				-1
O75489	VVAEPVELAQEFR	YES	NADH dehydrogenase [ubiquinone] iron-sulfur protein 3, mitochondrial	NDUFS3;NADH dehydrogenase [ubiquinone] iron-sulfur protein 3, mitochondrial;Complex I-30kD Short=CI-30kD ;NADH-ubiquinone oxidoreductase 30 kDa subunit;NDUS3;	(Human)	11	ELRYDDEVKR	VVAEPVELAQ	219	264							TRANSIT (Mitochondrion.)	CHAIN (NADH dehydrogenase [ubiquinone] iron- sulfur protein 3, mitochondrial.)					182
O75879	ESSVAQQPLHTAQKTR	YES	Glutamyl-tRNA(Gln) amidotransferase subunit B, mitochondrial	PET112;Glutamyl-tRNA(Gln) amidotransferase subunit B, mitochondrial;Cytochrome c oxidase assembly factor PET112 homolog;GATB;	(Human)	4	TGSTSNQIRG	ESSVAQQPLH	42	557					Subtiligase Based Positive Selection;unknown		TRANSIT (Mitochondrion.)	CHAIN (Glutamyl-tRNA(Gln) amidotransferase subunit B, mitochondrial.)	MOD_RES (N6-succinyllysine (By similarity).)				11
O75879	SSVAQQPLHTAQKTR	YES	Glutamyl-tRNA(Gln) amidotransferase subunit B, mitochondrial	PET112;Glutamyl-tRNA(Gln) amidotransferase subunit B, mitochondrial;Cytochrome c oxidase assembly factor PET112 homolog;GATB;	(Human)	4	GSTSNQIRGE	SSVAQQPLHT	43	557					Subtiligase Based Positive Selection;unknown		TRANSIT (Mitochondrion.)	CHAIN (Glutamyl-tRNA(Gln) amidotransferase subunit B, mitochondrial.)	MOD_RES (N6-succinyllysine (By similarity).)				12
O75964	AKVELVPPTPAEIPR	YES	ATP synthase subunit g, mitochondrial	ATP5L;ATP synthase subunit g, mitochondrial;ATP5L;	(Human)	11	KPRLATFWYY	AKVELVPPTP	34	103							INIT_MET (Removed.);MOD_RES (N-acetylalanine.);MOD_RES (N6-acetyllysine (By similarity).);MOD_RES (N6-acetyllysine.)	CHAIN (ATP synthase subunit g, mitochondrial.)	MOD_RES (N6-acetyllysine (By similarity).)
O75964	GIIGYDV	YES	ATP synthase subunit g, mitochondrial	ATP5L;ATP synthase subunit g, mitochondrial;ATP5L;	(Human)	11	FYVGEIIGKR	GIIGYDV	97	103							INIT_MET (Removed.);MOD_RES (N-acetylalanine.);MOD_RES (N6-acetyllysine (By similarity).);MOD_RES (N6-acetyllysine.)	CHAIN (ATP synthase subunit g, mitochondrial.)
O94925	AIAVNDLGTEYVHR	YES	Glutaminase kidney isoform, mitochondrial	GLS;Glutaminase kidney isoform, mitochondrial;K-glutaminase ;L-glutamine amidohydrolase;GLSK;	(Human)	2	LQSCVKPLKY	AIAVNDLGTE	294	669							MOD_RES (N6-succinyllysine (By similarity).);TRANSIT (Mitochondrion (By similarity).);BINDING (Substrate.)	CHAIN (Glutaminase kidney isoform, mitochondrial.)	MOD_RES (N6-acetyllysine.);REPEAT (ANK 1.);REPEAT (ANK 2.);BINDING (Substrate.);BINDING (Substrate; via amide nitrogen.);MUTAGEN (F->Y: No effect on catalytic activity. Loss of inhibition by BPTES; when associated with S-322.);MUTAGEN (F->S: No effect on catalytic activity. Loss of inhibition by BPTES; when associated with Y-318.);MUTAGEN (Y->L: No effect on catalytic activity. Loss of inhibition…				277
O95178	AGGGVHIEPR	YES	NADH dehydrogenase [ubiquinone] 1 beta subcomplex subunit 2, mitochondrial	NDUFB2;NADH dehydrogenase [ubiquinone] 1 beta subcomplex subunit 2, mitochondrial;Complex I-AGGG Short=CI-AGGG ;NADH-ubiquinone oxidoreductase AGGG subunit;NDUB2;	(Human)	7	RTAGDGGVRH	AGGGVHIEPR	34	105	X	X			Subtiligase Based Positive Selection		TRANSIT (Mitochondrion.)		CHAIN (NADH dehydrogenase [ubiquinone] 1 beta subcomplex subunit 2, mitochondrial.)				0
O95202	DDSVVEKSLK	YES	LETM1 and EF-hand domain-containing protein 1, mitochondrial	LETM1;LETM1 and EF-hand domain-containing protein 1, mitochondrial;Leucine zipper-EF-hand-containing transmembrane protein 1;LETM1;	(Human)	4	RGWHSSRPVR	DDSVVEKSLK	116	739	X	X					COMPBIAS (Poly-Pro.);TRANSIT (Mitochondrion (Potential).)	COILED (Potential.)	TOPO_DOM (Mitochondrial intermembrane (Potential).);TOPO_DOM (Mitochondrial matrix (Potential).);CHAIN (LETM1 and EF-hand domain-containing protein 1, mitochondrial.);COILED (Potential.);TRANSMEM (Helical; (Potential).);MOD_RES (N6-acetyllysine.);DOMAIN (LETM1.);DOMAIN (EF-hand.);CA_BIND (Potential.)			-114	0
O95822	ASGQAAGALER	YES	Malonyl-CoA decarboxylase, mitochondrial	MLYCD;Malonyl-CoA decarboxylase, mitochondrial;DCMC;	(Human)	16	LPPRPPGPRL	ASGQAAGALE	28	493					unknown;Subtiligase Based Positive Selection		TRANSIT (Mitochondrion.)	CHAIN (Malonyl-CoA decarboxylase, mitochondrial.)	DISULFID (Interchain (Potential).);MOTIF (Microbody targeting signal (Potential).);MOD_RES (N6-acetyllysine (By similarity).);MOD_RES (N6-acetyllysine; alternate (By similarity).);MOD_RES (N6-succinyllysine; alternate (By similarity).);MOD_RES (N6-succinyllysine (By similarity).);REGION (Malonyl-CoA binding (Probable).);BINDING (Malonyl-CoA (Probable).);MUTAGEN (C->S: Abolishes formation of disul…				27
O95822	MANYR	YES	Malonyl-CoA decarboxylase, mitochondrial	MLYCD;Malonyl-CoA decarboxylase, mitochondrial;DCMC;	(Human)	16	LRGITGSCGL	MANYRYFLEE	451	493							DISULFID (Interchain (Potential).);MOD_RES (N6-acetyllysine (By similarity).);MOD_RES (N6-acetyllysine; alternate (By similarity).);MOD_RES (N6-succinyllysine; alternate (By similarity).);MOD_RES (N6-succinyllysine (By similarity).);REGION (Malonyl-CoA binding (Probable).);TRANSIT (Mitochondrion.);BINDING (Malonyl-CoA (Probable).);MUTAGEN (C->S: Abolishes formation of disulfide- linked homotetram…	CHAIN (Malonyl-CoA decarboxylase, mitochondrial.)	MOTIF (Microbody targeting signal (Potential).);MOD_RES (N6-acetyllysine (By similarity).)				450
O95831	AKATAQDNPKSATEQSGTGIR	YES	Apoptosis-inducing factor 1, mitochondrial	AIFM1;Apoptosis-inducing factor 1, mitochondrial;Programmed cell death protein 8;AIFM1;	(Human)	X	DSSLPTVGVF	AKATAQDNPK	509	613							MOTIF (Nuclear localization signal (Potential).);NP_BIND (FAD.);CROSSLNK (Glycyl lysine isopeptide (Lys-Gly) (interchain with G-Cter in ubiquitin).);MOD_RES (Phosphothreonine.);MOD_RES (N6-succinyllysine (By similarity).);MOD_RES (Phosphoserine.);MOD_RES (N6-acetyllysine (By similarity).);BINDING (FAD.);BINDING (FAD; via amide nitrogen and carbonyl oxygen.);BINDING (FAD; via carbonyl oxygen.);TRA…	CHAIN (Apoptosis-inducing factor 1, mitochondrial.)	MOD_RES (N6-acetyllysine (By similarity).)		407		454
P00403	LLDVDNR	YES	Cytochrome c oxidase subunit 2	MT-CO2;Cytochrome c oxidase subunit 2;Cytochrome c oxidase polypeptide II;COX2;	(Human)	Mitochondrion	PLFLEPGDLR	LLDVDNRVVL	135	227							TOPO_DOM (Mitochondrial intermembrane (Potential).);TOPO_DOM (Mitochondrial matrix (Potential).);TRANSMEM (Helical; (Potential).)	TOPO_DOM (Mitochondrial intermembrane (Potential).);CHAIN (Cytochrome c oxidase subunit 2.)	METAL (Copper A (Probable).)			52
P00403	VVLPIEAPIR	YES	Cytochrome c oxidase subunit 2	MT-CO2;Cytochrome c oxidase subunit 2;Cytochrome c oxidase polypeptide II;COX2;	(Human)	Mitochondrion	DLRLLDVDNR	VVLPIEAPIR	142	227							TOPO_DOM (Mitochondrial intermembrane (Potential).);TOPO_DOM (Mitochondrial matrix (Potential).);TRANSMEM (Helical; (Potential).)	TOPO_DOM (Mitochondrial intermembrane (Potential).);CHAIN (Cytochrome c oxidase subunit 2.)	METAL (Copper A (Probable).)			59
P00505	AILNTPDLR	YES	Aspartate aminotransferase, mitochondrial	GOT2;Aspartate aminotransferase, mitochondrial;Fatty acid-binding protein Short=FABP-1 ;Glutamate oxaloacetate transaminase 2 ;Kynurenine aminotransferase 4 ;Kynurenine aminotransferase IV ;Kynurenine--oxoglutarate transaminase 4 ;Kynurenine--oxoglutarate transaminase IV ;Plasma membrane-associated fatty acid-binding protein Short=FABPpm ;Transaminase A;AATM;	(Human)	16	PPLNGARIAA	AILNTPDLRK	329	430							MOD_RES (N6-acetyllysine (By similarity).);MOD_RES (N6-acetyllysine; alternate.);MOD_RES (N6-succinyllysine; alternate (By similarity).);MOD_RES (Nitrated tyrosine (By similarity).);MOD_RES (N6-acetyllysine; alternate (By similarity).);MOD_RES (N6-succinyllysine (By similarity).);MOD_RES (N6-acetyllysine.);MOD_RES (N6-(pyridoxal phosphate)lysine; alternate (By similarity).);BINDING (Substrate; vi…	CHAIN (Aspartate aminotransferase, mitochondrial.)	MOD_RES (N6-acetyllysine; alternate (By similarity).);MOD_RES (N6-succinyllysine; alternate (By similarity).);MOD_RES (N6-acetyllysine (By similarity).);MOD_RES (N6-acetyllysine; alternate.);BINDING (Substrate (By similarity).)				299
P00505	AKNMGLYGER	YES	Aspartate aminotransferase, mitochondrial	GOT2;Aspartate aminotransferase, mitochondrial;Fatty acid-binding protein Short=FABP-1 ;Glutamate oxaloacetate transaminase 2 ;Kynurenine aminotransferase 4 ;Kynurenine aminotransferase IV ;Kynurenine--oxoglutarate transaminase 4 ;Kynurenine--oxoglutarate transaminase IV ;Plasma membrane-associated fatty acid-binding protein Short=FABPpm ;Transaminase A;AATM;	(Human)	16	GINVCLCQSY	AKNMGLYGER	278	430							MOD_RES (N6-acetyllysine (By similarity).);MOD_RES (N6-acetyllysine; alternate.);MOD_RES (N6-succinyllysine; alternate (By similarity).);MOD_RES (Nitrated tyrosine (By similarity).);MOD_RES (N6-acetyllysine; alternate (By similarity).);MOD_RES (N6-succinyllysine (By similarity).);MOD_RES (N6-acetyllysine.);BINDING (Substrate; via amide nitrogen (By similarity).);BINDING (Substrate (By similarity)…	CHAIN (Aspartate aminotransferase, mitochondrial.)	MOD_RES (N6-(pyridoxal phosphate)lysine; alternate (By similarity).);MOD_RES (N6-acetyllysine; alternate (By similarity).);MOD_RES (N6-acetyllysine; alternate.);MOD_RES (N6-succinyllysine; alternate (By similarity).);MOD_RES (N6-acetyllysine (By similarity).);BINDING (Substrate (By similarity).)				248
P00505	DAGMQLQGYR	YES	Aspartate aminotransferase, mitochondrial	GOT2;Aspartate aminotransferase, mitochondrial;Fatty acid-binding protein Short=FABP-1 ;Glutamate oxaloacetate transaminase 2 ;Kynurenine aminotransferase 4 ;Kynurenine aminotransferase IV ;Kynurenine--oxoglutarate transaminase 4 ;Kynurenine--oxoglutarate transaminase IV ;Plasma membrane-associated fatty acid-binding protein Short=FABPpm ;Transaminase A;AATM;	(Human)	16	TWGNHTPIFR	DAGMQLQGYR	171	430							MOD_RES (N6-acetyllysine (By similarity).);MOD_RES (N6-acetyllysine; alternate.);MOD_RES (N6-succinyllysine; alternate (By similarity).);MOD_RES (Nitrated tyrosine (By similarity).);MOD_RES (N6-acetyllysine; alternate (By similarity).);BINDING (Substrate; via amide nitrogen (By similarity).);BINDING (Substrate (By similarity).);TRANSIT (Mitochondrion.)	CHAIN (Aspartate aminotransferase, mitochondrial.)	MOD_RES (N6-acetyllysine; alternate (By similarity).);MOD_RES (N6-succinyllysine; alternate (By similarity).);MOD_RES (N6-succinyllysine (By similarity).);MOD_RES (N6-acetyllysine.);MOD_RES (N6-(pyridoxal phosphate)lysine; alternate (By similarity).);MOD_RES (N6-acetyllysine; alternate.);MOD_RES (N6-acetyllysine (By similarity).);BINDING (Substrate (By similarity).)				141
P00505	DDNGKPYVLPSVR	YES	Aspartate aminotransferase, mitochondrial	GOT2;Aspartate aminotransferase, mitochondrial;Fatty acid-binding protein Short=FABP-1 ;Glutamate oxaloacetate transaminase 2 ;Kynurenine aminotransferase 4 ;Kynurenine aminotransferase IV ;Kynurenine--oxoglutarate transaminase 4 ;Kynurenine--oxoglutarate transaminase IV ;Plasma membrane-associated fatty acid-binding protein Short=FABPpm ;Transaminase A;AATM;	(Human)	16	KMNLGVGAYR	DDNGKPYVLP	69	430							MOD_RES (N6-acetyllysine (By similarity).);BINDING (Substrate; via amide nitrogen (By similarity).);TRANSIT (Mitochondrion.)	CHAIN (Aspartate aminotransferase, mitochondrial.)	MOD_RES (N6-acetyllysine; alternate.);MOD_RES (N6-succinyllysine; alternate (By similarity).);MOD_RES (N6-acetyllysine (By similarity).);MOD_RES (Nitrated tyrosine (By similarity).);MOD_RES (N6-acetyllysine; alternate (By similarity).);MOD_RES (N6-succinyllysine (By similarity).);MOD_RES (N6-acetyllysine.);MOD_RES (N6-(pyridoxal phosphate)lysine; alternate (By similarity).);BINDING (Substrate (By…				39
P00505	FVTVQTISGTGALR	YES	Aspartate aminotransferase, mitochondrial	GOT2;Aspartate aminotransferase, mitochondrial;Fatty acid-binding protein Short=FABP-1 ;Glutamate oxaloacetate transaminase 2 ;Kynurenine aminotransferase 4 ;Kynurenine aminotransferase IV ;Kynurenine--oxoglutarate transaminase 4 ;Kynurenine--oxoglutarate transaminase IV ;Plasma membrane-associated fatty acid-binding protein Short=FABPpm ;Transaminase A;AATM;	(Human)	16	ENSEVLKSGR	FVTVQTISGT	126	430							MOD_RES (N6-acetyllysine (By similarity).);MOD_RES (N6-acetyllysine; alternate.);MOD_RES (N6-succinyllysine; alternate (By similarity).);MOD_RES (Nitrated tyrosine (By similarity).);MOD_RES (N6-acetyllysine; alternate (By similarity).);BINDING (Substrate; via amide nitrogen (By similarity).);TRANSIT (Mitochondrion.)	CHAIN (Aspartate aminotransferase, mitochondrial.)	MOD_RES (N6-acetyllysine; alternate.);MOD_RES (N6-succinyllysine; alternate (By similarity).);MOD_RES (N6-acetyllysine; alternate (By similarity).);MOD_RES (N6-succinyllysine (By similarity).);MOD_RES (N6-acetyllysine.);MOD_RES (N6-(pyridoxal phosphate)lysine; alternate (By similarity).);MOD_RES (N6-acetyllysine (By similarity).);BINDING (Substrate (By similarity).)				96
P00505	IAAAILNTPDLR	YES	Aspartate aminotransferase, mitochondrial	GOT2;Aspartate aminotransferase, mitochondrial;Fatty acid-binding protein Short=FABP-1 ;Glutamate oxaloacetate transaminase 2 ;Kynurenine aminotransferase 4 ;Kynurenine aminotransferase IV ;Kynurenine--oxoglutarate transaminase 4 ;Kynurenine--oxoglutarate transaminase IV ;Plasma membrane-associated fatty acid-binding protein Short=FABPpm ;Transaminase A;AATM;	(Human)	16	YSNPPLNGAR	IAAAILNTPD	326	430							MOD_RES (N6-acetyllysine (By similarity).);MOD_RES (N6-acetyllysine; alternate.);MOD_RES (N6-succinyllysine; alternate (By similarity).);MOD_RES (Nitrated tyrosine (By similarity).);MOD_RES (N6-acetyllysine; alternate (By similarity).);MOD_RES (N6-succinyllysine (By similarity).);MOD_RES (N6-acetyllysine.);MOD_RES (N6-(pyridoxal phosphate)lysine; alternate (By similarity).);BINDING (Substrate; vi…	CHAIN (Aspartate aminotransferase, mitochondrial.)	MOD_RES (N6-acetyllysine; alternate (By similarity).);MOD_RES (N6-succinyllysine; alternate (By similarity).);MOD_RES (N6-acetyllysine (By similarity).);MOD_RES (N6-acetyllysine; alternate.);BINDING (Substrate (By similarity).)				296
P00505	IGASFLQR	YES	Aspartate aminotransferase, mitochondrial	GOT2;Aspartate aminotransferase, mitochondrial;Fatty acid-binding protein Short=FABP-1 ;Glutamate oxaloacetate transaminase 2 ;Kynurenine aminotransferase 4 ;Kynurenine aminotransferase IV ;Kynurenine--oxoglutarate transaminase 4 ;Kynurenine--oxoglutarate transaminase IV ;Plasma membrane-associated fatty acid-binding protein Short=FABPpm ;Transaminase A;AATM;	(Human)	16	QTISGTGALR	IGASFLQRFF	140	430							MOD_RES (N6-acetyllysine (By similarity).);MOD_RES (N6-acetyllysine; alternate.);MOD_RES (N6-succinyllysine; alternate (By similarity).);MOD_RES (Nitrated tyrosine (By similarity).);MOD_RES (N6-acetyllysine; alternate (By similarity).);BINDING (Substrate; via amide nitrogen (By similarity).);TRANSIT (Mitochondrion.)	CHAIN (Aspartate aminotransferase, mitochondrial.)	MOD_RES (N6-acetyllysine; alternate.);MOD_RES (N6-succinyllysine; alternate (By similarity).);MOD_RES (N6-acetyllysine; alternate (By similarity).);MOD_RES (N6-succinyllysine (By similarity).);MOD_RES (N6-acetyllysine.);MOD_RES (N6-(pyridoxal phosphate)lysine; alternate (By similarity).);MOD_RES (N6-acetyllysine (By similarity).);BINDING (Substrate (By similarity).)				110
P00505	PMYSNPPLNGAR	YES	Aspartate aminotransferase, mitochondrial	GOT2;Aspartate aminotransferase, mitochondrial;Fatty acid-binding protein Short=FABP-1 ;Glutamate oxaloacetate transaminase 2 ;Kynurenine aminotransferase 4 ;Kynurenine aminotransferase IV ;Kynurenine--oxoglutarate transaminase 4 ;Kynurenine--oxoglutarate transaminase IV ;Plasma membrane-associated fatty acid-binding protein Short=FABPpm ;Transaminase A;AATM;	(Human)	16	VESQLKILIR	PMYSNPPLNG	314	430							MOD_RES (N6-acetyllysine (By similarity).);MOD_RES (N6-acetyllysine; alternate.);MOD_RES (N6-succinyllysine; alternate (By similarity).);MOD_RES (Nitrated tyrosine (By similarity).);MOD_RES (N6-acetyllysine; alternate (By similarity).);MOD_RES (N6-succinyllysine (By similarity).);MOD_RES (N6-acetyllysine.);MOD_RES (N6-(pyridoxal phosphate)lysine; alternate (By similarity).);BINDING (Substrate; vi…	CHAIN (Aspartate aminotransferase, mitochondrial.)	MOD_RES (N6-acetyllysine; alternate (By similarity).);MOD_RES (N6-succinyllysine; alternate (By similarity).);MOD_RES (N6-acetyllysine (By similarity).);MOD_RES (N6-acetyllysine; alternate.);BINDING (Substrate (By similarity).)				284
P00505	VGAFTMVCKDADEAKR	YES	Aspartate aminotransferase, mitochondrial	GOT2;Aspartate aminotransferase, mitochondrial;Fatty acid-binding protein Short=FABP-1 ;Glutamate oxaloacetate transaminase 2 ;Kynurenine aminotransferase 4 ;Kynurenine aminotransferase IV ;Kynurenine--oxoglutarate transaminase 4 ;Kynurenine--oxoglutarate transaminase IV ;Plasma membrane-associated fatty acid-binding protein Short=FABPpm ;Transaminase A;AATM;	(Human)	16	AKNMGLYGER	VGAFTMVCKD	288	430							MOD_RES (N6-acetyllysine (By similarity).);MOD_RES (N6-acetyllysine; alternate.);MOD_RES (N6-succinyllysine; alternate (By similarity).);MOD_RES (Nitrated tyrosine (By similarity).);MOD_RES (N6-acetyllysine; alternate (By similarity).);MOD_RES (N6-succinyllysine (By similarity).);MOD_RES (N6-acetyllysine.);MOD_RES (N6-(pyridoxal phosphate)lysine; alternate (By similarity).);BINDING (Substrate; vi…	CHAIN (Aspartate aminotransferase, mitochondrial.)	MOD_RES (N6-acetyllysine; alternate.);MOD_RES (N6-succinyllysine; alternate (By similarity).);MOD_RES (N6-acetyllysine (By similarity).);MOD_RES (N6-acetyllysine; alternate (By similarity).);BINDING (Substrate (By similarity).)				258
P04181	TSVATKKTVQGPPTSDDIFER	YES	Ornithine aminotransferase, mitochondrial	OAT;Ornithine aminotransferase, mitochondrial;Ornithine delta-aminotransferase ;Ornithine--oxo-acid aminotransferase;OAT;	(Human)	10	RGVHSSVASA	TSVATKKTVQ	26	439		X					TRANSIT (Mitochondrion; in hepatic form.)	TRANSIT (Mitochondrion; in renal form.)	CHAIN (Ornithine aminotransferase, hepatic form.);CHAIN (Ornithine aminotransferase, renal form.);MOD_RES (N6-acetyllysine (By similarity).);MOD_RES (N6-succinyllysine (By similarity).);MOD_RES (N6-acetyllysine; alternate (By similarity).);MOD_RES (N6-succinyllysine; alternate (By similarity).);MOD_RES (N6-(pyridoxal phosphate)lysine.)				-10
P04181	VHSSVASATSVATKKTVQGPPTSDDIFER	YES	Ornithine aminotransferase, mitochondrial	OAT;Ornithine aminotransferase, mitochondrial;Ornithine delta-aminotransferase ;Ornithine--oxo-acid aminotransferase;OAT;	(Human)	10	LQRFAVLSRG	VHSSVASATS	18	439				MPPB	unknown;Subtiligase Based Positive Selection			TRANSIT (Mitochondrion; in renal form.);TRANSIT (Mitochondrion; in hepatic form.)	CHAIN (Ornithine aminotransferase, hepatic form.);CHAIN (Ornithine aminotransferase, renal form.);MOD_RES (N6-acetyllysine (By similarity).);MOD_RES (N6-succinyllysine (By similarity).);MOD_RES (N6-acetyllysine; alternate (By similarity).);MOD_RES (N6-succinyllysine; alternate (By similarity).);MOD_RES (N6-(pyridoxal phosphate)lysine.)				-18
P04406	TMEKAGAHLQGGAKR	YES	Glyceraldehyde-3-phosphate dehydrogenase	GAPDH;Glyceraldehyde-3-phosphate dehydrogenase;Peptidyl-cysteine S-nitrosylase GAPDH EC=2.6.99.-;G3P;	(Human)	12	YVVESTGVFT	TMEKAGAHLQ	104	335					Subtiligase Based Positive Selection		MOD_RES (N6,N6-dimethyllysine.);MOD_RES (Deamidated asparagine.);MOD_RES (Phosphotyrosine.);MOD_RES (N6-acetyllysine.);MOD_RES (Phosphothreonine.);MOD_RES (Phosphoserine.);NP_BIND (NAD.);BINDING (NAD.);BINDING (NAD; via carbonyl oxygen.);INIT_MET (Removed.)	CHAIN (Glyceraldehyde-3-phosphate dehydrogenase.);REGION (Interaction with WARS.)	MOD_RES (Phosphoserine.);MOD_RES (Deamidated asparagine.);MOD_RES (ADP-ribosylcysteine; by autocatalysis; in irreversibly inhibited form (By similarity).);MOD_RES (Cysteine persulfide (By similarity).);MOD_RES (S-nitrosocysteine; in reversibly inhibited form (By similarity).);MOD_RES (Phosphothreonine.);MOD_RES (N6,N6-dimethyllysine; alternate.);MOD_RES (N6-acetyllysine; alternate.);MOD_RES (N6-m…
P04406	VPTANVSVVDLTCR	YES	Glyceraldehyde-3-phosphate dehydrogenase	GAPDH;Glyceraldehyde-3-phosphate dehydrogenase;Peptidyl-cysteine S-nitrosylase GAPDH EC=2.6.99.-;G3P;	(Human)	12	NGKLTGMAFR	VPTANVSVVD	235	335					unknown;N-TAILS		MOD_RES (N6,N6-dimethyllysine.);MOD_RES (Deamidated asparagine.);MOD_RES (Phosphotyrosine.);MOD_RES (N6-acetyllysine.);MOD_RES (Phosphothreonine.);MOD_RES (Phosphoserine.);MOD_RES (ADP-ribosylcysteine; by autocatalysis; in irreversibly inhibited form (By similarity).);MOD_RES (Cysteine persulfide (By similarity).);MOD_RES (S-nitrosocysteine; in reversibly inhibited form (By similarity).);MOD_RES …	CHAIN (Glyceraldehyde-3-phosphate dehydrogenase.)	MOD_RES (Phosphothreonine.);MOD_RES (N6-acetyllysine.);MOD_RES (N6,N6-dimethyllysine.);MOD_RES (Phosphoserine.);MOD_RES (Deamidated asparagine.);BINDING (NAD.)
P04406	VSVVDLTCR	YES	Glyceraldehyde-3-phosphate dehydrogenase	GAPDH;Glyceraldehyde-3-phosphate dehydrogenase;Peptidyl-cysteine S-nitrosylase GAPDH EC=2.6.99.-;G3P;	(Human)	12	GMAFRVPTAN	VSVVDLTCRL	240	335				MEP1B;MEP1A			MOD_RES (N6,N6-dimethyllysine.);MOD_RES (Deamidated asparagine.);MOD_RES (Phosphotyrosine.);MOD_RES (N6-acetyllysine.);MOD_RES (Phosphothreonine.);MOD_RES (Phosphoserine.);MOD_RES (ADP-ribosylcysteine; by autocatalysis; in irreversibly inhibited form (By similarity).);MOD_RES (Cysteine persulfide (By similarity).);MOD_RES (S-nitrosocysteine; in reversibly inhibited form (By similarity).);MOD_RES …	CHAIN (Glyceraldehyde-3-phosphate dehydrogenase.)	MOD_RES (N6-acetyllysine.);MOD_RES (N6,N6-dimethyllysine.);MOD_RES (Phosphoserine.);MOD_RES (Deamidated asparagine.);BINDING (NAD.)
P04406	VVDLMAHMASKE	YES	Glyceraldehyde-3-phosphate dehydrogenase	GAPDH;Glyceraldehyde-3-phosphate dehydrogenase;Peptidyl-cysteine S-nitrosylase GAPDH EC=2.6.99.-;G3P;	(Human)	12	YDNEFGYSNR	VVDLMAHMAS	324	335							MOD_RES (N6,N6-dimethyllysine.);MOD_RES (Deamidated asparagine.);MOD_RES (Phosphotyrosine.);MOD_RES (N6-acetyllysine.);MOD_RES (Phosphothreonine.);MOD_RES (Phosphoserine.);MOD_RES (ADP-ribosylcysteine; by autocatalysis; in irreversibly inhibited form (By similarity).);MOD_RES (Cysteine persulfide (By similarity).);MOD_RES (S-nitrosocysteine; in reversibly inhibited form (By similarity).);MOD_RES …	CHAIN (Glyceraldehyde-3-phosphate dehydrogenase.)	MOD_RES (N6,N6-dimethyllysine.)
P05141	GNLANVIR	YES	ADP/ATP translocase 2	SLC25A5;ADP/ATP translocase 2;ADP,ATP carrier protein 2 ;ADP,ATP carrier protein, fibroblast isoform ;Adenine nucleotide translocator 2 Short=ANT 2 ;Solute carrier family 25 member 5;ADT2;	(Human)	X	KEQGVLSFWR	GNLANVIRYF	73	298							TRANSMEM (Helical; Name=1; (By similarity).);INIT_MET (Removed; alternate.);MOD_RES (N-acetylmethionine.);MOD_RES (N-acetylthreonine; in ADP/ATP translocase 2, N-terminally processed.);MOD_RES (N6-malonyllysine.);MOD_RES (N6-succinyllysine (By similarity).);MOD_RES (N6,N6-dimethyllysine; alternate.);MOD_RES (N6-methyllysine; alternate.)	REPEAT (Solcar 1.);CHAIN (ADP/ATP translocase 2.);CHAIN (ADP/ATP translocase 2, N-terminally processed.)	MOTIF (Substrate recognition (By similarity).);REPEAT (Solcar 2.);REPEAT (Solcar 3.);TRANSMEM (Helical; Name=2; (By similarity).);TRANSMEM (Helical; Name=3; (By similarity).);TRANSMEM (Helical; Name=4; (By similarity).);TRANSMEM (Helical; Name=5; (By similarity).);TRANSMEM (Helical; Name=6; (By similarity).);MOD_RES (N6-malonyllysine.);MOD_RES (N6-acetyllysine; alternate.);MOD_RES (N6-succinyllys…			33
P05141	KGTDIMYTGTLDCWR	YES	ADP/ATP translocase 2	SLC25A5;ADP/ATP translocase 2;ADP,ATP carrier protein 2 ;ADP,ATP carrier protein, fibroblast isoform ;Adenine nucleotide translocator 2 Short=ANT 2 ;Solute carrier family 25 member 5;ADT2;	(Human)	X	RRRMMMQSGR	KGTDIMYTGT	245	298							MOTIF (Substrate recognition (By similarity).);REPEAT (Solcar 1.);REPEAT (Solcar 2.);TRANSMEM (Helical; Name=1; (By similarity).);TRANSMEM (Helical; Name=2; (By similarity).);TRANSMEM (Helical; Name=3; (By similarity).);TRANSMEM (Helical; Name=4; (By similarity).);TRANSMEM (Helical; Name=5; (By similarity).);INIT_MET (Removed; alternate.);MOD_RES (N-acetylmethionine.);MOD_RES (N-acetylthreonine; …	REPEAT (Solcar 3.);CHAIN (ADP/ATP translocase 2.);CHAIN (ADP/ATP translocase 2, N-terminally processed.)	TRANSMEM (Helical; Name=6; (By similarity).);MOD_RES (N6-acetyllysine; alternate (By similarity).);MOD_RES (N6-succinyllysine; alternate (By similarity).)			205
P05141	LAADVGKAGAER	YES	ADP/ATP translocase 2	SLC25A5;ADP/ATP translocase 2;ADP,ATP carrier protein 2 ;ADP,ATP carrier protein, fibroblast isoform ;Adenine nucleotide translocator 2 Short=ANT 2 ;Solute carrier family 25 member 5;ADT2;	(Human)	X	VYPLDFARTR	LAADVGKAGA	141	298					Subtiligase Based Positive Selection		REPEAT (Solcar 1.);TRANSMEM (Helical; Name=1; (By similarity).);TRANSMEM (Helical; Name=2; (By similarity).);INIT_MET (Removed; alternate.);MOD_RES (N-acetylmethionine.);MOD_RES (N-acetylthreonine; in ADP/ATP translocase 2, N-terminally processed.);MOD_RES (N6-malonyllysine.);MOD_RES (N6-succinyllysine (By similarity).);MOD_RES (N6,N6-dimethyllysine; alternate.);MOD_RES (N6-methyllysine; alternat…	REPEAT (Solcar 2.);TRANSMEM (Helical; Name=3; (By similarity).);CHAIN (ADP/ATP translocase 2.);CHAIN (ADP/ATP translocase 2, N-terminally processed.)	MOTIF (Substrate recognition (By similarity).);REPEAT (Solcar 3.);TRANSMEM (Helical; Name=4; (By similarity).);TRANSMEM (Helical; Name=5; (By similarity).);TRANSMEM (Helical; Name=6; (By similarity).);MOD_RES (N6-acetyllysine; alternate (By similarity).);MOD_RES (N6-malonyllysine; alternate.);MOD_RES (N6-succinyllysine; alternate (By similarity).);MOD_RES (N6-acetyllysine.);MOD_RES (N6-acetyllysi…			101
P05141	TAVAPIER	YES	ADP/ATP translocase 2	SLC25A5;ADP/ATP translocase 2;ADP,ATP carrier protein 2 ;ADP,ATP carrier protein, fibroblast isoform ;Adenine nucleotide translocator 2 Short=ANT 2 ;Solute carrier family 25 member 5;ADT2;	(Human)	X	AGGVAAAISK	TAVAPIERVK	24	298							INIT_MET (Removed; alternate.);MOD_RES (N-acetylmethionine.);MOD_RES (N-acetylthreonine; in ADP/ATP translocase 2, N-terminally processed.);MOD_RES (N6-malonyllysine.)	REPEAT (Solcar 1.);TRANSMEM (Helical; Name=1; (By similarity).);CHAIN (ADP/ATP translocase 2.);CHAIN (ADP/ATP translocase 2, N-terminally processed.)	MOTIF (Substrate recognition (By similarity).);REPEAT (Solcar 2.);REPEAT (Solcar 3.);TRANSMEM (Helical; Name=2; (By similarity).);TRANSMEM (Helical; Name=3; (By similarity).);TRANSMEM (Helical; Name=4; (By similarity).);TRANSMEM (Helical; Name=5; (By similarity).);TRANSMEM (Helical; Name=6; (By similarity).);MOD_RES (N6-succinyllysine (By similarity).);MOD_RES (N6,N6-dimethyllysine; alternate.);M…			-16
P05141	TRLAADVGKAGAER	YES	ADP/ATP translocase 2	SLC25A5;ADP/ATP translocase 2;ADP,ATP carrier protein 2 ;ADP,ATP carrier protein, fibroblast isoform ;Adenine nucleotide translocator 2 Short=ANT 2 ;Solute carrier family 25 member 5;ADT2;	(Human)	X	CFVYPLDFAR	TRLAADVGKA	139	298					Subtiligase Based Positive Selection		REPEAT (Solcar 1.);TRANSMEM (Helical; Name=1; (By similarity).);TRANSMEM (Helical; Name=2; (By similarity).);INIT_MET (Removed; alternate.);MOD_RES (N-acetylmethionine.);MOD_RES (N-acetylthreonine; in ADP/ATP translocase 2, N-terminally processed.);MOD_RES (N6-malonyllysine.);MOD_RES (N6-succinyllysine (By similarity).);MOD_RES (N6,N6-dimethyllysine; alternate.);MOD_RES (N6-methyllysine; alternat…	REPEAT (Solcar 2.);TRANSMEM (Helical; Name=3; (By similarity).);CHAIN (ADP/ATP translocase 2.);CHAIN (ADP/ATP translocase 2, N-terminally processed.)	MOTIF (Substrate recognition (By similarity).);REPEAT (Solcar 3.);TRANSMEM (Helical; Name=4; (By similarity).);TRANSMEM (Helical; Name=5; (By similarity).);TRANSMEM (Helical; Name=6; (By similarity).);MOD_RES (N6-acetyllysine; alternate (By similarity).);MOD_RES (N6-malonyllysine; alternate.);MOD_RES (N6-succinyllysine; alternate (By similarity).);MOD_RES (N6-acetyllysine.);MOD_RES (N6-acetyllysi…			99
P06576	AAQTSPSPKAGAATGR	YES	ATP synthase subunit beta, mitochondrial	ATP5B;ATP synthase subunit beta, mitochondrial;ATPB;	(Human)	12	PTAVHPVRDY	AAQTSPSPKA	47	529	X	X			Subtiligase Based Positive Selection;unknown			TRANSIT (Mitochondrion.)	NP_BIND (ATP (By similarity).);MOD_RES (N6-acetyllysine; alternate (By similarity).);MOD_RES (N6-succinyllysine; alternate (By similarity).);MOD_RES (N6-acetyllysine; alternate.);MOD_RES (N6-acetyllysine.);MOD_RES (N6-acetyllysine (By similarity).);MOD_RES (Phosphoserine (By similarity).);CHAIN (ATP synthase subunit beta, mitochondrial.)				-1
P06576	AIAELGIYPAVD	YES	ATP synthase subunit beta, mitochondrial	ATP5B;ATP synthase subunit beta, mitochondrial;ATPB;	(Human)	12	HLDATTVLSR	AIAELGIYPA	388	529							NP_BIND (ATP (By similarity).);MOD_RES (N6-acetyllysine; alternate (By similarity).);MOD_RES (N6-succinyllysine; alternate (By similarity).);MOD_RES (N6-acetyllysine; alternate.);MOD_RES (N6-acetyllysine.);TRANSIT (Mitochondrion.)	CHAIN (ATP synthase subunit beta, mitochondrial.)	MOD_RES (N6-acetyllysine.);MOD_RES (N6-acetyllysine (By similarity).);MOD_RES (N6-acetyllysine; alternate (By similarity).);MOD_RES (N6-succinyllysine; alternate (By similarity).);MOD_RES (Phosphoserine (By similarity).)				340
P06576	AIAELGIYPAVDPLDSTSR	YES	ATP synthase subunit beta, mitochondrial	ATP5B;ATP synthase subunit beta, mitochondrial;ATPB;	(Human)	12	HLDATTVLSR	AIAELGIYPA	388	529							NP_BIND (ATP (By similarity).);MOD_RES (N6-acetyllysine; alternate (By similarity).);MOD_RES (N6-succinyllysine; alternate (By similarity).);MOD_RES (N6-acetyllysine; alternate.);MOD_RES (N6-acetyllysine.);TRANSIT (Mitochondrion.)	CHAIN (ATP synthase subunit beta, mitochondrial.)	MOD_RES (N6-acetyllysine.);MOD_RES (N6-acetyllysine (By similarity).);MOD_RES (N6-acetyllysine; alternate (By similarity).);MOD_RES (N6-succinyllysine; alternate (By similarity).);MOD_RES (Phosphoserine (By similarity).)				340
P06576	AQTSPSPKAGAATGR	YES	ATP synthase subunit beta, mitochondrial	ATP5B;ATP synthase subunit beta, mitochondrial;ATPB;	(Human)	12	TAVHPVRDYA	AQTSPSPKAG	48	529	X	X			Subtiligase Based Positive Selection;unknown		TRANSIT (Mitochondrion.)		NP_BIND (ATP (By similarity).);MOD_RES (N6-acetyllysine; alternate (By similarity).);MOD_RES (N6-succinyllysine; alternate (By similarity).);MOD_RES (N6-acetyllysine; alternate.);MOD_RES (N6-acetyllysine.);MOD_RES (N6-acetyllysine (By similarity).);MOD_RES (Phosphoserine (By similarity).);CHAIN (ATP synthase subunit beta, mitochondrial.)				0
P06576	FTQAGSEVSALLGR	YES	ATP synthase subunit beta, mitochondrial	ATP5B;ATP synthase subunit beta, mitochondrial;ATPB;	(Human)	12	VLLFIDNIFR	FTQAGSEVSA	311	529					Subtiligase Based Positive Selection		NP_BIND (ATP (By similarity).);MOD_RES (N6-acetyllysine; alternate (By similarity).);MOD_RES (N6-succinyllysine; alternate (By similarity).);MOD_RES (N6-acetyllysine; alternate.);MOD_RES (N6-acetyllysine.);TRANSIT (Mitochondrion.)	CHAIN (ATP synthase subunit beta, mitochondrial.)	MOD_RES (N6-acetyllysine.);MOD_RES (N6-acetyllysine (By similarity).);MOD_RES (N6-acetyllysine; alternate (By similarity).);MOD_RES (N6-succinyllysine; alternate (By similarity).);MOD_RES (Phosphoserine (By similarity).)				263
P06576	GQKVLDSGAPIKIPVGPETLGR	YES	ATP synthase subunit beta, mitochondrial	ATP5B;ATP synthase subunit beta, mitochondrial;ATPB;	(Human)	12	AMDGTEGLVR	GQKVLDSGAP	122	529							TRANSIT (Mitochondrion.)	CHAIN (ATP synthase subunit beta, mitochondrial.)	NP_BIND (ATP (By similarity).);MOD_RES (N6-acetyllysine; alternate (By similarity).);MOD_RES (N6-succinyllysine; alternate (By similarity).);MOD_RES (N6-acetyllysine; alternate.);MOD_RES (N6-acetyllysine.);MOD_RES (N6-acetyllysine (By similarity).);MOD_RES (Phosphoserine (By similarity).)				74
P06576	IMDPNIVGSEHYDVAR	YES	ATP synthase subunit beta, mitochondrial	ATP5B;ATP synthase subunit beta, mitochondrial;ATPB;	(Human)	12	AVDPLDSTSR	IMDPNIVGSE	407	529							NP_BIND (ATP (By similarity).);MOD_RES (N6-acetyllysine; alternate (By similarity).);MOD_RES (N6-succinyllysine; alternate (By similarity).);MOD_RES (N6-acetyllysine; alternate.);MOD_RES (N6-acetyllysine.);TRANSIT (Mitochondrion.)	CHAIN (ATP synthase subunit beta, mitochondrial.)	MOD_RES (N6-acetyllysine.);MOD_RES (N6-acetyllysine (By similarity).);MOD_RES (N6-acetyllysine; alternate (By similarity).);MOD_RES (N6-succinyllysine; alternate (By similarity).);MOD_RES (Phosphoserine (By similarity).)				359
P06576	IMNVIGEPIDER	YES	ATP synthase subunit beta, mitochondrial	ATP5B;ATP synthase subunit beta, mitochondrial;ATPB;	(Human)	12	IPVGPETLGR	IMNVIGEPID	144	529					Subtiligase Based Positive Selection		MOD_RES (N6-acetyllysine; alternate (By similarity).);MOD_RES (N6-succinyllysine; alternate (By similarity).);MOD_RES (N6-acetyllysine; alternate.);TRANSIT (Mitochondrion.)	CHAIN (ATP synthase subunit beta, mitochondrial.)	NP_BIND (ATP (By similarity).);MOD_RES (N6-acetyllysine; alternate (By similarity).);MOD_RES (N6-succinyllysine; alternate (By similarity).);MOD_RES (N6-acetyllysine.);MOD_RES (N6-acetyllysine (By similarity).);MOD_RES (Phosphoserine (By similarity).)				96
P06576	IPSAVGYQPTLATDMGTMQER	YES	ATP synthase subunit beta, mitochondrial	ATP5B;ATP synthase subunit beta, mitochondrial;ATPB;	(Human)	12	GSEVSALLGR	IPSAVGYQPT	325	529							NP_BIND (ATP (By similarity).);MOD_RES (N6-acetyllysine; alternate (By similarity).);MOD_RES (N6-succinyllysine; alternate (By similarity).);MOD_RES (N6-acetyllysine; alternate.);MOD_RES (N6-acetyllysine.);TRANSIT (Mitochondrion.)	CHAIN (ATP synthase subunit beta, mitochondrial.)	MOD_RES (N6-acetyllysine.);MOD_RES (N6-acetyllysine (By similarity).);MOD_RES (N6-acetyllysine; alternate (By similarity).);MOD_RES (N6-succinyllysine; alternate (By similarity).);MOD_RES (Phosphoserine (By similarity).)				277
P06576	IVGSEHYDVAR	YES	ATP synthase subunit beta, mitochondrial	ATP5B;ATP synthase subunit beta, mitochondrial;ATPB;	(Human)	12	DSTSRIMDPN	IVGSEHYDVA	412	529				CATS			NP_BIND (ATP (By similarity).);MOD_RES (N6-acetyllysine; alternate (By similarity).);MOD_RES (N6-succinyllysine; alternate (By similarity).);MOD_RES (N6-acetyllysine; alternate.);MOD_RES (N6-acetyllysine.);TRANSIT (Mitochondrion.)	CHAIN (ATP synthase subunit beta, mitochondrial.)	MOD_RES (N6-acetyllysine.);MOD_RES (N6-acetyllysine (By similarity).);MOD_RES (N6-acetyllysine; alternate (By similarity).);MOD_RES (N6-succinyllysine; alternate (By similarity).);MOD_RES (Phosphoserine (By similarity).)				364
P06576	LDATTVLSR	YES	ATP synthase subunit beta, mitochondrial	ATP5B;ATP synthase subunit beta, mitochondrial;ATPB;	(Human)	12	DPAPATTFAH	LDATTVLSRA	379	529							NP_BIND (ATP (By similarity).);MOD_RES (N6-acetyllysine; alternate (By similarity).);MOD_RES (N6-succinyllysine; alternate (By similarity).);MOD_RES (N6-acetyllysine; alternate.);MOD_RES (N6-acetyllysine.);TRANSIT (Mitochondrion.)	CHAIN (ATP synthase subunit beta, mitochondrial.)	MOD_RES (N6-acetyllysine.);MOD_RES (N6-acetyllysine (By similarity).);MOD_RES (N6-acetyllysine; alternate (By similarity).);MOD_RES (N6-succinyllysine; alternate (By similarity).);MOD_RES (Phosphoserine (By similarity).)				331
P06576	LVLEVAQHLGESTVR	YES	ATP synthase subunit beta, mitochondrial	ATP5B;ATP synthase subunit beta, mitochondrial;ATPB;	(Human)	12	ALEVQGRETR	LVLEVAQHLG	95	529							TRANSIT (Mitochondrion.)	CHAIN (ATP synthase subunit beta, mitochondrial.)	NP_BIND (ATP (By similarity).);MOD_RES (N6-acetyllysine; alternate (By similarity).);MOD_RES (N6-succinyllysine; alternate (By similarity).);MOD_RES (N6-acetyllysine; alternate.);MOD_RES (N6-acetyllysine.);MOD_RES (N6-acetyllysine (By similarity).);MOD_RES (Phosphoserine (By similarity).)				47
P06576	SVFAGVGER	YES	ATP synthase subunit beta, mitochondrial	ATP5B;ATP synthase subunit beta, mitochondrial;ATPB;	(Human)	12	NNVAKAHGGY	SVFAGVGERT	231	529							NP_BIND (ATP (By similarity).);MOD_RES (N6-acetyllysine; alternate (By similarity).);MOD_RES (N6-succinyllysine; alternate (By similarity).);MOD_RES (N6-acetyllysine; alternate.);MOD_RES (N6-acetyllysine.);TRANSIT (Mitochondrion.)	CHAIN (ATP synthase subunit beta, mitochondrial.)	MOD_RES (N6-acetyllysine; alternate (By similarity).);MOD_RES (N6-succinyllysine; alternate (By similarity).);MOD_RES (N6-acetyllysine.);MOD_RES (N6-acetyllysine (By similarity).);MOD_RES (Phosphoserine (By similarity).)				183
P06576	TIAMDGTEGLVR	YES	ATP synthase subunit beta, mitochondrial	ATP5B;ATP synthase subunit beta, mitochondrial;ATPB;	(Human)	12	AQHLGESTVR	TIAMDGTEGL	110	529					Subtiligase Based Positive Selection;unknown		TRANSIT (Mitochondrion.)	CHAIN (ATP synthase subunit beta, mitochondrial.)	NP_BIND (ATP (By similarity).);MOD_RES (N6-acetyllysine; alternate (By similarity).);MOD_RES (N6-succinyllysine; alternate (By similarity).);MOD_RES (N6-acetyllysine; alternate.);MOD_RES (N6-acetyllysine.);MOD_RES (N6-acetyllysine (By similarity).);MOD_RES (Phosphoserine (By similarity).)				62
P06576	TQAGSEVSALLGR	YES	ATP synthase subunit beta, mitochondrial	ATP5B;ATP synthase subunit beta, mitochondrial;ATPB;	(Human)	12	LLFIDNIFRF	TQAGSEVSAL	312	529					Subtiligase Based Positive Selection		NP_BIND (ATP (By similarity).);MOD_RES (N6-acetyllysine; alternate (By similarity).);MOD_RES (N6-succinyllysine; alternate (By similarity).);MOD_RES (N6-acetyllysine; alternate.);MOD_RES (N6-acetyllysine.);TRANSIT (Mitochondrion.)	CHAIN (ATP synthase subunit beta, mitochondrial.)	MOD_RES (N6-acetyllysine.);MOD_RES (N6-acetyllysine (By similarity).);MOD_RES (N6-acetyllysine; alternate (By similarity).);MOD_RES (N6-succinyllysine; alternate (By similarity).);MOD_RES (Phosphoserine (By similarity).)				264
P06576	TSPSPKAGAATGR	YES	ATP synthase subunit beta, mitochondrial	ATP5B;ATP synthase subunit beta, mitochondrial;ATPB;	(Human)	12	VHPVRDYAAQ	TSPSPKAGAA	50	529	X	X			Subtiligase Based Positive Selection;unknown		TRANSIT (Mitochondrion.)	CHAIN (ATP synthase subunit beta, mitochondrial.)	NP_BIND (ATP (By similarity).);MOD_RES (N6-acetyllysine; alternate (By similarity).);MOD_RES (N6-succinyllysine; alternate (By similarity).);MOD_RES (N6-acetyllysine; alternate.);MOD_RES (N6-acetyllysine.);MOD_RES (N6-acetyllysine (By similarity).);MOD_RES (Phosphoserine (By similarity).)				2
P06576	VALTGLTVAEYFR	YES	ATP synthase subunit beta, mitochondrial	ATP5B;ATP synthase subunit beta, mitochondrial;ATPB;	(Human)	12	MNEPPGARAR	VALTGLTVAE	282	529							NP_BIND (ATP (By similarity).);MOD_RES (N6-acetyllysine; alternate (By similarity).);MOD_RES (N6-succinyllysine; alternate (By similarity).);MOD_RES (N6-acetyllysine; alternate.);MOD_RES (N6-acetyllysine.);TRANSIT (Mitochondrion.)	CHAIN (ATP synthase subunit beta, mitochondrial.)	MOD_RES (N6-acetyllysine.);MOD_RES (N6-acetyllysine (By similarity).);MOD_RES (N6-acetyllysine; alternate (By similarity).);MOD_RES (N6-succinyllysine; alternate (By similarity).);MOD_RES (Phosphoserine (By similarity).)				234
P07237	DAPEEEDHVLVLR	YES	Protein disulfide-isomerase	P4HB;Protein disulfide-isomerase;Cellular thyroid hormone-binding protein ;Prolyl 4-hydroxylase subunit beta ;p55;PDIA1;	(Human)	17	CLAVAALVRA	DAPEEEDHVL	18	508	X	X			unknown;Subtiligase Based Positive Selection;N-TAILS		SIGNAL ()		MOD_RES (N6-acetyllysine (By similarity).);MOD_RES (N6-succinyllysine (By similarity).);ACT_SITE (Nucleophile.);ACT_SITE (Nucleophile (By similarity).);DISULFID (Redox-active.);DISULFID (Redox-active (By similarity).);DOMAIN (Thioredoxin 1.);DOMAIN (Thioredoxin 2.);MOTIF (Prevents secretion from ER.);CHAIN (Protein disulfide-isomerase.);SITE (Contributes to redox potential value.);SITE (Lowers pK…	0
P07237	EADDIVNWLKKR	YES	Protein disulfide-isomerase	P4HB;Protein disulfide-isomerase;Cellular thyroid hormone-binding protein ;Prolyl 4-hydroxylase subunit beta ;p55;PDIA1;	(Human)	17	ASPKEYTAGR	EADDIVNWLK	121	508							ACT_SITE (Nucleophile.);DISULFID (Redox-active.);SIGNAL ();SITE (Contributes to redox potential value.);SITE (Lowers pKa of C-terminal Cys of first active site.)	DOMAIN (Thioredoxin 1.);CHAIN (Protein disulfide-isomerase.)	MOD_RES (N6-acetyllysine (By similarity).);MOD_RES (N6-succinyllysine (By similarity).);ACT_SITE (Nucleophile (By similarity).);DISULFID (Redox-active (By similarity).);DOMAIN (Thioredoxin 2.);MOTIF (Prevents secretion from ER.);SITE (Contributes to redox potential value (By similarity).);SITE (Lowers pKa of C-terminal Cys of second active site (By similarity).)	103
P07237	IFIDSDHTDNQR	YES	Protein disulfide-isomerase	P4HB;Protein disulfide-isomerase;Cellular thyroid hormone-binding protein ;Prolyl 4-hydroxylase subunit beta ;p55;PDIA1;	(Human)	17	AESFKGKILF	IFIDSDHTDN	289	508							MOD_RES (N6-acetyllysine (By similarity).);MOD_RES (N6-succinyllysine (By similarity).);ACT_SITE (Nucleophile.);DISULFID (Redox-active.);SIGNAL ();DOMAIN (Thioredoxin 1.);SITE (Contributes to redox potential value.);SITE (Lowers pKa of C-terminal Cys of first active site.)	CHAIN (Protein disulfide-isomerase.)	ACT_SITE (Nucleophile (By similarity).);DISULFID (Redox-active (By similarity).);DOMAIN (Thioredoxin 2.);MOTIF (Prevents secretion from ER.);SITE (Contributes to redox potential value (By similarity).);SITE (Lowers pKa of C-terminal Cys of second active site (By similarity).)	271
P07237	ILEFFGLKKEECPAVR	YES	Protein disulfide-isomerase	P4HB;Protein disulfide-isomerase;Cellular thyroid hormone-binding protein ;Prolyl 4-hydroxylase subunit beta ;p55;PDIA1;	(Human)	17	IDSDHTDNQR	ILEFFGLKKE	301	508							MOD_RES (N6-acetyllysine (By similarity).);MOD_RES (N6-succinyllysine (By similarity).);ACT_SITE (Nucleophile.);DISULFID (Redox-active.);SIGNAL ();DOMAIN (Thioredoxin 1.);SITE (Contributes to redox potential value.);SITE (Lowers pKa of C-terminal Cys of first active site.)	CHAIN (Protein disulfide-isomerase.)	ACT_SITE (Nucleophile (By similarity).);DISULFID (Redox-active (By similarity).);DOMAIN (Thioredoxin 2.);MOTIF (Prevents secretion from ER.);SITE (Contributes to redox potential value (By similarity).);SITE (Lowers pKa of C-terminal Cys of second active site (By similarity).)	283
P07237	LAKVDATEESDLAQQYGVR	YES	Protein disulfide-isomerase	P4HB;Protein disulfide-isomerase;Cellular thyroid hormone-binding protein ;Prolyl 4-hydroxylase subunit beta ;p55;PDIA1;	(Human)	17	KLKAEGSEIR	LAKVDATEES	79	508							ACT_SITE (Nucleophile.);DISULFID (Redox-active.);SIGNAL ();SITE (Contributes to redox potential value.)	DOMAIN (Thioredoxin 1.);CHAIN (Protein disulfide-isomerase.)	MOD_RES (N6-acetyllysine (By similarity).);MOD_RES (N6-succinyllysine (By similarity).);ACT_SITE (Nucleophile (By similarity).);DISULFID (Redox-active (By similarity).);DOMAIN (Thioredoxin 2.);MOTIF (Prevents secretion from ER.);SITE (Lowers pKa of C-terminal Cys of first active site.);SITE (Contributes to redox potential value (By similarity).);SITE (Lowers pKa of C-terminal Cys of second active…	61
P07237	LKAEGSEIR	YES	Protein disulfide-isomerase	P4HB;Protein disulfide-isomerase;Cellular thyroid hormone-binding protein ;Prolyl 4-hydroxylase subunit beta ;p55;PDIA1;	(Human)	17	APEYAKAAGK	LKAEGSEIRL	70	508							ACT_SITE (Nucleophile.);DISULFID (Redox-active.);SIGNAL ();SITE (Contributes to redox potential value.)	DOMAIN (Thioredoxin 1.);CHAIN (Protein disulfide-isomerase.)	MOD_RES (N6-acetyllysine (By similarity).);MOD_RES (N6-succinyllysine (By similarity).);ACT_SITE (Nucleophile (By similarity).);DISULFID (Redox-active (By similarity).);DOMAIN (Thioredoxin 2.);MOTIF (Prevents secretion from ER.);SITE (Lowers pKa of C-terminal Cys of first active site.);SITE (Contributes to redox potential value (By similarity).);SITE (Lowers pKa of C-terminal Cys of second active…	52
P07237	NGDTASPKEYTAGR	YES	Protein disulfide-isomerase	P4HB;Protein disulfide-isomerase;Cellular thyroid hormone-binding protein ;Prolyl 4-hydroxylase subunit beta ;p55;PDIA1;	(Human)	17	RGYPTIKFFR	NGDTASPKEY	107	508							ACT_SITE (Nucleophile.);DISULFID (Redox-active.);SIGNAL ();SITE (Contributes to redox potential value.)	DOMAIN (Thioredoxin 1.);CHAIN (Protein disulfide-isomerase.)	MOD_RES (N6-acetyllysine (By similarity).);MOD_RES (N6-succinyllysine (By similarity).);ACT_SITE (Nucleophile (By similarity).);DISULFID (Redox-active (By similarity).);DOMAIN (Thioredoxin 2.);MOTIF (Prevents secretion from ER.);SITE (Lowers pKa of C-terminal Cys of first active site.);SITE (Contributes to redox potential value (By similarity).);SITE (Lowers pKa of C-terminal Cys of second active…	89
P07237	TASPKEYTAGR	YES	Protein disulfide-isomerase	P4HB;Protein disulfide-isomerase;Cellular thyroid hormone-binding protein ;Prolyl 4-hydroxylase subunit beta ;p55;PDIA1;	(Human)	17	PTIKFFRNGD	TASPKEYTAG	110	508							ACT_SITE (Nucleophile.);DISULFID (Redox-active.);SIGNAL ();SITE (Contributes to redox potential value.)	DOMAIN (Thioredoxin 1.);CHAIN (Protein disulfide-isomerase.)	MOD_RES (N6-acetyllysine (By similarity).);MOD_RES (N6-succinyllysine (By similarity).);ACT_SITE (Nucleophile (By similarity).);DISULFID (Redox-active (By similarity).);DOMAIN (Thioredoxin 2.);MOTIF (Prevents secretion from ER.);SITE (Lowers pKa of C-terminal Cys of first active site.);SITE (Contributes to redox potential value (By similarity).);SITE (Lowers pKa of C-terminal Cys of second active…	92
P07237	TVIDYNGER	YES	Protein disulfide-isomerase	P4HB;Protein disulfide-isomerase;Cellular thyroid hormone-binding protein ;Prolyl 4-hydroxylase subunit beta ;p55;PDIA1;	(Human)	17	LKFFPASADR	TVIDYNGERT	453	508							MOD_RES (N6-acetyllysine (By similarity).);MOD_RES (N6-succinyllysine (By similarity).);ACT_SITE (Nucleophile.);ACT_SITE (Nucleophile (By similarity).);DISULFID (Redox-active.);DISULFID (Redox-active (By similarity).);SIGNAL ();DOMAIN (Thioredoxin 1.);SITE (Contributes to redox potential value.);SITE (Lowers pKa of C-terminal Cys of first active site.);SITE (Contributes to redox potential value (…	DOMAIN (Thioredoxin 2.);CHAIN (Protein disulfide-isomerase.)	MOTIF (Prevents secretion from ER.);SITE (Lowers pKa of C-terminal Cys of second active site (By similarity).)	435
P07437	AILVDLEPGTMDSVR	YES	Tubulin beta chain	TUBB;Tubulin beta chain;Tubulin beta-5 chain;TBB5;	(Human)	6	EATGGKYVPR	AILVDLEPGT	63	444				GRAA	Subtiligase Based Positive Selection		MOD_RES (N6-acetyllysine; alternate.);MOD_RES (N6-succinyllysine; alternate (By similarity).);CROSSLNK (Glycyl lysine isopeptide (Lys-Gly) (interchain with G-Cter in ubiquitin); alternate.)	CHAIN (Tubulin beta chain.)	MOD_RES (Phosphoserine; by CDK1 (By similarity).);MOD_RES (Omega-N-methylarginine.);NP_BIND (GTP (Potential).);CROSSLNK (Glycyl lysine isopeptide (Lys-Gly) (interchain with G-Cter in ubiquitin).)
P07954	IYELAAGGTAVGTGLNTR	YES	Fumarate hydratase, mitochondrial	FH;Fumarate hydratase, mitochondrial;FUMH;	(Human)	1	MTRIKAAMPR	IYELAAGGTA	269	510							MOD_RES (N6-acetyllysine; alternate (By similarity).);MOD_RES (N6-succinyllysine; alternate (By similarity).);MOD_RES (N6-acetyllysine; alternate.);MOD_RES (N6-acetyllysine.);MOD_RES (N6-acetyllysine (By similarity).);REGION (B site (By similarity).);REGION (Substrate binding (By similarity).);TRANSIT (Mitochondrion (By similarity).);BINDING (Substrate (By similarity).)	CHAIN (Fumarate hydratase, mitochondrial.)	MOD_RES (N6-acetyllysine; alternate.);MOD_RES (N6-succinyllysine; alternate (By similarity).);MOD_RES (N6-succinyllysine (By similarity).);MOD_RES (N6-acetyllysine (By similarity).)				224
P08559	ANDATFEIKKCDLHR	YES	Pyruvate dehydrogenase E1 component subunit alpha, somatic form, mitochondrial	PDHA1;Pyruvate dehydrogenase E1 component subunit alpha, somatic form, mitochondrial;PDHE1-A type I;ODPA;	(Human)	X	SRVLVASRNF	ANDATFEIKK	31	390	X	X			Subtiligase Based Positive Selection		TRANSIT (Mitochondrion.)		CHAIN (Pyruvate dehydrogenase E1 component subunit alpha, somatic form, mitochondrial.);MOD_RES (N6-acetyllysine; alternate (By similarity).);MOD_RES (N6-succinyllysine; alternate (By similarity).);MOD_RES (Phosphoserine; by PDK1.);MOD_RES (N6-succinyllysine (By similarity).);MOD_RES (Phosphoserine; by PDK1, PDK2, PDK3 and PDK4.);MOD_RES (Phosphoserine (By similarity).);MOD_RES (Phosphotyrosine (…				0
P08559	EILAELTGR	YES	Pyruvate dehydrogenase E1 component subunit alpha, somatic form, mitochondrial	PDHA1;Pyruvate dehydrogenase E1 component subunit alpha, somatic form, mitochondrial;PDHE1-A type I;ODPA;	(Human)	X	FTFTRGLSVR	EILAELTGRK	133	390							MOD_RES (N6-acetyllysine; alternate (By similarity).);MOD_RES (N6-succinyllysine; alternate (By similarity).);TRANSIT (Mitochondrion.)	CHAIN (Pyruvate dehydrogenase E1 component subunit alpha, somatic form, mitochondrial.)	MOD_RES (Phosphoserine; by PDK1.);MOD_RES (N6-acetyllysine; alternate (By similarity).);MOD_RES (N6-succinyllysine; alternate (By similarity).);MOD_RES (N6-succinyllysine (By similarity).);MOD_RES (Phosphoserine; by PDK1, PDK2, PDK3 and PDK4.);MOD_RES (Phosphoserine (By similarity).);MOD_RES (Phosphotyrosine (By similarity).);MOD_RES (N6-acetyllysine.);MOD_RES (N6-acetyllysine (By similarity).);M…				102
P08559	FANDATFEIKKCDLHR	YES	Pyruvate dehydrogenase E1 component subunit alpha, somatic form, mitochondrial	PDHA1;Pyruvate dehydrogenase E1 component subunit alpha, somatic form, mitochondrial;PDHE1-A type I;ODPA;	(Human)	X	ASRVLVASRN	FANDATFEIK	30	390	X	X			Subtiligase Based Positive Selection			TRANSIT (Mitochondrion.)	CHAIN (Pyruvate dehydrogenase E1 component subunit alpha, somatic form, mitochondrial.);MOD_RES (N6-acetyllysine; alternate (By similarity).);MOD_RES (N6-succinyllysine; alternate (By similarity).);MOD_RES (Phosphoserine; by PDK1.);MOD_RES (N6-succinyllysine (By similarity).);MOD_RES (Phosphoserine; by PDK1, PDK2, PDK3 and PDK4.);MOD_RES (Phosphoserine (By similarity).);MOD_RES (Phosphotyrosine (…				-1
P08559	GDFIPGLR	YES	Pyruvate dehydrogenase E1 component subunit alpha, somatic form, mitochondrial	PDHA1;Pyruvate dehydrogenase E1 component subunit alpha, somatic form, mitochondrial;PDHE1-A type I;ODPA;	(Human)	X	AAASTDYYKR	GDFIPGLRVD	246	390							MOD_RES (N6-acetyllysine; alternate (By similarity).);MOD_RES (N6-succinyllysine; alternate (By similarity).);MOD_RES (Phosphoserine; by PDK1.);TRANSIT (Mitochondrion.);MUTAGEN (S->A: Abolishes inactivation by phosphorylation; when associated with A- 293 and A-300.)	CHAIN (Pyruvate dehydrogenase E1 component subunit alpha, somatic form, mitochondrial.)	MOD_RES (N6-succinyllysine (By similarity).);MOD_RES (Phosphoserine; by PDK1, PDK2, PDK3 and PDK4.);MOD_RES (Phosphoserine (By similarity).);MOD_RES (Phosphotyrosine (By similarity).);MOD_RES (N6-acetyllysine; alternate (By similarity).);MOD_RES (N6-succinyllysine; alternate (By similarity).);MOD_RES (N6-acetyllysine.);MOD_RES (N6-acetyllysine (By similarity).);MUTAGEN (S->A: Reduces enzyme activ…				215
P08559	SKSDPIMLLKDR	YES	Pyruvate dehydrogenase E1 component subunit alpha, somatic form, mitochondrial	PDHA1;Pyruvate dehydrogenase E1 component subunit alpha, somatic form, mitochondrial;PDHE1-A type I;ODPA;	(Human)	X	RTREEIQEVR	SKSDPIMLLK	312	390							MOD_RES (N6-acetyllysine; alternate (By similarity).);MOD_RES (N6-succinyllysine; alternate (By similarity).);MOD_RES (Phosphoserine; by PDK1.);MOD_RES (N6-succinyllysine (By similarity).);MOD_RES (Phosphoserine; by PDK1, PDK2, PDK3 and PDK4.);MOD_RES (Phosphoserine (By similarity).);MOD_RES (Phosphotyrosine (By similarity).);TRANSIT (Mitochondrion.);MUTAGEN (S->A: Abolishes inactivation by phosp…	CHAIN (Pyruvate dehydrogenase E1 component subunit alpha, somatic form, mitochondrial.)	MOD_RES (N6-acetyllysine; alternate (By similarity).);MOD_RES (N6-succinyllysine; alternate (By similarity).);MOD_RES (N6-acetyllysine.);MOD_RES (N6-acetyllysine (By similarity).);MOD_RES (N6-succinyllysine (By similarity).)				281
P08559	TREEIQEVR	YES	Pyruvate dehydrogenase E1 component subunit alpha, somatic form, mitochondrial	PDHA1;Pyruvate dehydrogenase E1 component subunit alpha, somatic form, mitochondrial;PDHE1-A type I;ODPA;	(Human)	X	SMSDPGVSYR	TREEIQEVRS	303	390							MOD_RES (N6-acetyllysine; alternate (By similarity).);MOD_RES (N6-succinyllysine; alternate (By similarity).);MOD_RES (Phosphoserine; by PDK1.);MOD_RES (N6-succinyllysine (By similarity).);MOD_RES (Phosphoserine; by PDK1, PDK2, PDK3 and PDK4.);MOD_RES (Phosphoserine (By similarity).);MOD_RES (Phosphotyrosine (By similarity).);TRANSIT (Mitochondrion.);MUTAGEN (S->A: Abolishes inactivation by phosp…	CHAIN (Pyruvate dehydrogenase E1 component subunit alpha, somatic form, mitochondrial.)	MOD_RES (N6-acetyllysine; alternate (By similarity).);MOD_RES (N6-succinyllysine; alternate (By similarity).);MOD_RES (N6-acetyllysine.);MOD_RES (N6-acetyllysine (By similarity).);MOD_RES (N6-succinyllysine (By similarity).)				272
P08559	VDGMDILCVR	YES	Pyruvate dehydrogenase E1 component subunit alpha, somatic form, mitochondrial	PDHA1;Pyruvate dehydrogenase E1 component subunit alpha, somatic form, mitochondrial;PDHE1-A type I;ODPA;	(Human)	X	KRGDFIPGLR	VDGMDILCVR	254	390							MOD_RES (N6-acetyllysine; alternate (By similarity).);MOD_RES (N6-succinyllysine; alternate (By similarity).);MOD_RES (Phosphoserine; by PDK1.);TRANSIT (Mitochondrion.);MUTAGEN (S->A: Abolishes inactivation by phosphorylation; when associated with A- 293 and A-300.)	CHAIN (Pyruvate dehydrogenase E1 component subunit alpha, somatic form, mitochondrial.)	MOD_RES (N6-succinyllysine (By similarity).);MOD_RES (Phosphoserine; by PDK1, PDK2, PDK3 and PDK4.);MOD_RES (Phosphoserine (By similarity).);MOD_RES (Phosphotyrosine (By similarity).);MOD_RES (N6-acetyllysine; alternate (By similarity).);MOD_RES (N6-succinyllysine; alternate (By similarity).);MOD_RES (N6-acetyllysine.);MOD_RES (N6-acetyllysine (By similarity).);MUTAGEN (S->A: Reduces enzyme activ…				223
P08574	SDLELHPPSYPWSHR	YES	Cytochrome c1, heme protein, mitochondrial	CYC1;Cytochrome c1, heme protein, mitochondrial;Complex III subunit 4 ;Complex III subunit IV ;Cytochrome b-c1 complex subunit 4 ;Ubiquinol-cytochrome-c reductase complex cytochrome c1 subunit Short=Cytochrome c-1;CY1;	(Human)	8	AMALHSAVSA	SDLELHPPSY	85	325	X	X			Subtiligase Based Positive Selection		TRANSIT (Mitochondrion.)		CHAIN (Cytochrome c1, heme protein, mitochondrial.);METAL (Iron (heme axial ligand).);METAL (Iron (heme axial ligand) (By similarity).);TRANSMEM (Helical; Note=Anchors to the membrane; (Potential).);BINDING (Heme (covalent).);DOMAIN (Cytochrome c.)			-222	0
P09110	LSGAPQASAADVVVVHGR	YES	3-ketoacyl-CoA thiolase, peroxisomal	ACAA1;3-ketoacyl-CoA thiolase, peroxisomal;Acetyl-CoA acyltransferase ;Beta-ketothiolase ;Peroxisomal 3-oxoacyl-CoA thiolase;THIK;	(Human)	3	SGWMPQAAPC	LSGAPQASAA	27	424	X	X			Subtiligase Based Positive Selection;unknown		TRANSIT (Peroxisome.)		MOD_RES (Phosphothreonine.);ACT_SITE (Acyl-thioester intermediate (By similarity).);ACT_SITE (Proton acceptor (By similarity).);CHAIN (3-ketoacyl-CoA thiolase, peroxisomal.)				0
P09622	VCHAHPTLSEAFR	YES	Dihydrolipoyl dehydrogenase, mitochondrial	DLD;Dihydrolipoyl dehydrogenase, mitochondrial;Dihydrolipoamide dehydrogenase ;Glycine cleavage system L protein;DLDH;	(Human)	7	YGASCEDIAR	VCHAHPTLSE	483	509							DISULFID (Redox-active.);MOD_RES (N6-acetyllysine; alternate (By similarity).);MOD_RES (N6-succinyllysine; alternate (By similarity).);MOD_RES (N6-acetyllysine; alternate.);MOD_RES (N6-succinyllysine (By similarity).);MOD_RES (N6-acetyllysine (By similarity).);MOD_RES (N6-acetyllysine.);NP_BIND (FAD.);NP_BIND (NAD.);TRANSIT (Mitochondrion.);BINDING (FAD.);BINDING (FAD; via amide nitrogen and carb…	CHAIN (Dihydrolipoyl dehydrogenase, mitochondrial.)	MOD_RES (N6-acetyllysine; alternate (By similarity).);MOD_RES (N6-succinyllysine; alternate (By similarity).);ACT_SITE (Proton acceptor (By similarity).)				447
P10109	SSSEDKITVH	YES	Adrenodoxin, mitochondrial	FDX1;Adrenodoxin, mitochondrial;Adrenal ferredoxin ;Ferredoxin-1 ;Hepatoredoxin;ADX;	(Human)	11	RSLSVSARAR	SSSEDKITVH	61	184	X	X			unknown;Subtiligase Based Positive Selection		TRANSIT (Mitochondrion.)		DOMAIN (2Fe-2S ferredoxin-type.);MOD_RES (N6-acetyllysine; alternate (By similarity).);MOD_RES (N6-succinyllysine; alternate (By similarity).);MOD_RES (N6-succinyllysine (By similarity).);CHAIN (Adrenodoxin, mitochondrial.);METAL (Iron-sulfur (2Fe-2S).)				0
P10606	ASGGGVPTDEEQATGLER	YES	Cytochrome c oxidase subunit 5B, mitochondrial	COX5B;Cytochrome c oxidase subunit 5B, mitochondrial;Cytochrome c oxidase polypeptide Vb;COX5B;	(Human)	2	PSGAAAMRSM	ASGGGVPTDE	32	129	X	X			Subtiligase Based Positive Selection;unknown		TRANSIT (Mitochondrion.)		MOD_RES (N6-acetyllysine (By similarity).);CHAIN (Cytochrome c oxidase subunit 5B, mitochondrial.);METAL (Zinc (By similarity).)				0
P10809	AAVEEGIVLGGGCALLR	YES	60 kDa heat shock protein, mitochondrial	HSPD1;60 kDa heat shock protein, mitochondrial;60 kDa chaperonin ;Chaperonin 60 Short=CPN60 ;Heat shock protein 60 Short=HSP-60 Short=Hsp60 ;HuCHA60 ;Mitochondrial matrix protein P1 ;P60 lymphocyte protein;CH60;	(Human)	2	RVTDALNATR	AAVEEGIVLG	430	573							MOD_RES (N6-succinyllysine (By similarity).);MOD_RES (Phosphoserine.);MOD_RES (N6-acetyllysine (By similarity).);MOD_RES (N6-acetyllysine; alternate.);MOD_RES (N6-succinyllysine; alternate (By similarity).);MOD_RES (N6-acetyllysine.);MOD_RES (N6-acetyllysine; alternate (By similarity).);MOD_RES (N6-malonyllysine; alternate.);MOD_RES (Phosphoserine (By similarity).);TRANSIT (Mitochondrion.)	CHAIN (60 kDa heat shock protein, mitochondrial.)	MOD_RES (N6-acetyllysine.);MOD_RES (N6-acetyllysine; alternate (By similarity).);MOD_RES (N6-succinyllysine; alternate (By similarity).)				403
P10809	AKDVKFGADAR	YES	60 kDa heat shock protein, mitochondrial	HSPD1;60 kDa heat shock protein, mitochondrial;60 kDa chaperonin ;Chaperonin 60 Short=CPN60 ;Heat shock protein 60 Short=HSP-60 Short=Hsp60 ;HuCHA60 ;Mitochondrial matrix protein P1 ;P60 lymphocyte protein;CH60;	(Human)	2	VLAPHLTRAY	AKDVKFGADA	27	573	X	X			Subtiligase Based Positive Selection		TRANSIT (Mitochondrion.)		MOD_RES (N6-succinyllysine (By similarity).);MOD_RES (Phosphoserine.);MOD_RES (N6-acetyllysine (By similarity).);MOD_RES (N6-acetyllysine; alternate.);MOD_RES (N6-succinyllysine; alternate (By similarity).);MOD_RES (N6-acetyllysine.);MOD_RES (N6-acetyllysine; alternate (By similarity).);MOD_RES (N6-malonyllysine; alternate.);MOD_RES (Phosphoserine (By similarity).);CHAIN (60 kDa heat shock protei…				0
P10809	AYAKDVKFGADAR	YES	60 kDa heat shock protein, mitochondrial	HSPD1;60 kDa heat shock protein, mitochondrial;60 kDa chaperonin ;Chaperonin 60 Short=CPN60 ;Heat shock protein 60 Short=HSP-60 Short=Hsp60 ;HuCHA60 ;Mitochondrial matrix protein P1 ;P60 lymphocyte protein;CH60;	(Human)	2	SRVLAPHLTR	AYAKDVKFGA	25	573	X	X			Subtiligase Based Positive Selection			TRANSIT (Mitochondrion.)	MOD_RES (N6-succinyllysine (By similarity).);MOD_RES (Phosphoserine.);MOD_RES (N6-acetyllysine (By similarity).);MOD_RES (N6-acetyllysine; alternate.);MOD_RES (N6-succinyllysine; alternate (By similarity).);MOD_RES (N6-acetyllysine.);MOD_RES (N6-acetyllysine; alternate (By similarity).);MOD_RES (N6-malonyllysine; alternate.);MOD_RES (Phosphoserine (By similarity).);CHAIN (60 kDa heat shock protei…				-2
P10809	EKISKGANPVEIR	YES	60 kDa heat shock protein, mitochondrial	HSPD1;60 kDa heat shock protein, mitochondrial;60 kDa chaperonin ;Chaperonin 60 Short=CPN60 ;Heat shock protein 60 Short=HSP-60 Short=Hsp60 ;HuCHA60 ;Mitochondrial matrix protein P1 ;P60 lymphocyte protein;CH60;	(Human)	2	LARSIAKEGF	EKISKGANPV	129	573							MOD_RES (N6-succinyllysine (By similarity).);MOD_RES (Phosphoserine.);MOD_RES (N6-acetyllysine (By similarity).);MOD_RES (N6-acetyllysine; alternate.);MOD_RES (N6-succinyllysine; alternate (By similarity).);TRANSIT (Mitochondrion.)	CHAIN (60 kDa heat shock protein, mitochondrial.)	MOD_RES (N6-acetyllysine.);MOD_RES (N6-acetyllysine; alternate (By similarity).);MOD_RES (N6-malonyllysine; alternate.);MOD_RES (N6-succinyllysine; alternate (By similarity).);MOD_RES (N6-acetyllysine (By similarity).);MOD_RES (N6-acetyllysine; alternate.);MOD_RES (N6-succinyllysine (By similarity).);MOD_RES (Phosphoserine (By similarity).)				102
P10809	KVGGTSDVEVNEKKDR	YES	60 kDa heat shock protein, mitochondrial	HSPD1;60 kDa heat shock protein, mitochondrial;60 kDa chaperonin ;Chaperonin 60 Short=CPN60 ;Heat shock protein 60 Short=HSP-60 Short=Hsp60 ;HuCHA60 ;Mitochondrial matrix protein P1 ;P60 lymphocyte protein;CH60;	(Human)	2	AKLSDGVAVL	KVGGTSDVEV	405	573				CATS;CATL1	Subtiligase Based Positive Selection		MOD_RES (N6-succinyllysine (By similarity).);MOD_RES (Phosphoserine.);MOD_RES (N6-acetyllysine (By similarity).);MOD_RES (N6-acetyllysine; alternate.);MOD_RES (N6-succinyllysine; alternate (By similarity).);MOD_RES (N6-acetyllysine.);MOD_RES (N6-acetyllysine; alternate (By similarity).);MOD_RES (N6-malonyllysine; alternate.);TRANSIT (Mitochondrion.)	CHAIN (60 kDa heat shock protein, mitochondrial.)	MOD_RES (Phosphoserine (By similarity).);MOD_RES (N6-acetyllysine.);MOD_RES (N6-acetyllysine; alternate (By similarity).);MOD_RES (N6-succinyllysine; alternate (By similarity).)				378
P10809	LVQDVANNTNEEAGDGTTTATVLAR	YES	60 kDa heat shock protein, mitochondrial	HSPD1;60 kDa heat shock protein, mitochondrial;60 kDa chaperonin ;Chaperonin 60 Short=CPN60 ;Heat shock protein 60 Short=HSP-60 Short=Hsp60 ;HuCHA60 ;Mitochondrial matrix protein P1 ;P60 lymphocyte protein;CH60;	(Human)	2	KDKYKNIGAK	LVQDVANNTN	97	573					Subtiligase Based Positive Selection;unknown		MOD_RES (N6-succinyllysine (By similarity).);MOD_RES (Phosphoserine.);MOD_RES (N6-acetyllysine (By similarity).);MOD_RES (N6-acetyllysine; alternate.);MOD_RES (N6-succinyllysine; alternate (By similarity).);TRANSIT (Mitochondrion.)	CHAIN (60 kDa heat shock protein, mitochondrial.)	MOD_RES (N6-acetyllysine; alternate.);MOD_RES (N6-succinyllysine; alternate (By similarity).);MOD_RES (N6-acetyllysine.);MOD_RES (N6-acetyllysine; alternate (By similarity).);MOD_RES (N6-malonyllysine; alternate.);MOD_RES (N6-acetyllysine (By similarity).);MOD_RES (N6-succinyllysine (By similarity).);MOD_RES (Phosphoserine (By similarity).)				70
P10809	SIAKEGFEKISKGANPVEIR	YES	60 kDa heat shock protein, mitochondrial	HSPD1;60 kDa heat shock protein, mitochondrial;60 kDa chaperonin ;Chaperonin 60 Short=CPN60 ;Heat shock protein 60 Short=HSP-60 Short=Hsp60 ;HuCHA60 ;Mitochondrial matrix protein P1 ;P60 lymphocyte protein;CH60;	(Human)	2	GTTTATVLAR	SIAKEGFEKI	122	573							MOD_RES (N6-succinyllysine (By similarity).);MOD_RES (Phosphoserine.);MOD_RES (N6-acetyllysine (By similarity).);MOD_RES (N6-acetyllysine; alternate.);MOD_RES (N6-succinyllysine; alternate (By similarity).);TRANSIT (Mitochondrion.)	CHAIN (60 kDa heat shock protein, mitochondrial.)	MOD_RES (N6-acetyllysine; alternate.);MOD_RES (N6-succinyllysine; alternate (By similarity).);MOD_RES (N6-acetyllysine.);MOD_RES (N6-acetyllysine; alternate (By similarity).);MOD_RES (N6-malonyllysine; alternate.);MOD_RES (N6-acetyllysine (By similarity).);MOD_RES (N6-succinyllysine (By similarity).);MOD_RES (Phosphoserine (By similarity).)				95
P10809	SIQSIVPALEIANAHR	YES	60 kDa heat shock protein, mitochondrial	HSPD1;60 kDa heat shock protein, mitochondrial;60 kDa chaperonin ;Chaperonin 60 Short=CPN60 ;Heat shock protein 60 Short=HSP-60 Short=Hsp60 ;HuCHA60 ;Mitochondrial matrix protein P1 ;P60 lymphocyte protein;CH60;	(Human)	2	YVLLSEKKIS	SIQSIVPALE	253	573					Subtiligase Based Positive Selection		MOD_RES (N6-succinyllysine (By similarity).);MOD_RES (Phosphoserine.);MOD_RES (N6-acetyllysine (By similarity).);MOD_RES (N6-acetyllysine; alternate.);MOD_RES (N6-succinyllysine; alternate (By similarity).);MOD_RES (N6-acetyllysine.);MOD_RES (N6-acetyllysine; alternate (By similarity).);MOD_RES (N6-malonyllysine; alternate.);TRANSIT (Mitochondrion.)	CHAIN (60 kDa heat shock protein, mitochondrial.)	MOD_RES (N6-acetyllysine.);MOD_RES (N6-acetyllysine (By similarity).);MOD_RES (N6-succinyllysine (By similarity).);MOD_RES (N6-acetyllysine; alternate.);MOD_RES (N6-succinyllysine; alternate (By similarity).);MOD_RES (Phosphoserine (By similarity).);MOD_RES (N6-acetyllysine; alternate (By similarity).)				226
P10809	SIVPALEIANAHR	YES	60 kDa heat shock protein, mitochondrial	HSPD1;60 kDa heat shock protein, mitochondrial;60 kDa chaperonin ;Chaperonin 60 Short=CPN60 ;Heat shock protein 60 Short=HSP-60 Short=Hsp60 ;HuCHA60 ;Mitochondrial matrix protein P1 ;P60 lymphocyte protein;CH60;	(Human)	2	LSEKKISSIQ	SIVPALEIAN	256	573				MEP1A;MEP1B	Subtiligase Based Positive Selection		MOD_RES (N6-succinyllysine (By similarity).);MOD_RES (Phosphoserine.);MOD_RES (N6-acetyllysine (By similarity).);MOD_RES (N6-acetyllysine; alternate.);MOD_RES (N6-succinyllysine; alternate (By similarity).);MOD_RES (N6-acetyllysine.);MOD_RES (N6-acetyllysine; alternate (By similarity).);MOD_RES (N6-malonyllysine; alternate.);TRANSIT (Mitochondrion.)	CHAIN (60 kDa heat shock protein, mitochondrial.)	MOD_RES (N6-acetyllysine.);MOD_RES (N6-acetyllysine (By similarity).);MOD_RES (N6-succinyllysine (By similarity).);MOD_RES (N6-acetyllysine; alternate.);MOD_RES (N6-succinyllysine; alternate (By similarity).);MOD_RES (Phosphoserine (By similarity).);MOD_RES (N6-acetyllysine; alternate (By similarity).)				229
P10809	TALLDAAGVA	YES	60 kDa heat shock protein, mitochondrial	HSPD1;60 kDa heat shock protein, mitochondrial;60 kDa chaperonin ;Chaperonin 60 Short=CPN60 ;Heat shock protein 60 Short=HSP-60 Short=Hsp60 ;HuCHA60 ;Mitochondrial matrix protein P1 ;P60 lymphocyte protein;CH60;	(Human)	2	GIIDPTKVVR	TALLDAAGVA	527	573							MOD_RES (N6-succinyllysine (By similarity).);MOD_RES (Phosphoserine.);MOD_RES (N6-acetyllysine (By similarity).);MOD_RES (N6-acetyllysine; alternate.);MOD_RES (N6-succinyllysine; alternate (By similarity).);MOD_RES (N6-acetyllysine.);MOD_RES (N6-acetyllysine; alternate (By similarity).);MOD_RES (N6-malonyllysine; alternate.);MOD_RES (Phosphoserine (By similarity).);TRANSIT (Mitochondrion.)	CHAIN (60 kDa heat shock protein, mitochondrial.)					500
P10809	TNEEAGDGTTTATVLAR	YES	60 kDa heat shock protein, mitochondrial	HSPD1;60 kDa heat shock protein, mitochondrial;60 kDa chaperonin ;Chaperonin 60 Short=CPN60 ;Heat shock protein 60 Short=HSP-60 Short=Hsp60 ;HuCHA60 ;Mitochondrial matrix protein P1 ;P60 lymphocyte protein;CH60;	(Human)	2	AKLVQDVANN	TNEEAGDGTT	105	573					Subtiligase Based Positive Selection		MOD_RES (N6-succinyllysine (By similarity).);MOD_RES (Phosphoserine.);MOD_RES (N6-acetyllysine (By similarity).);MOD_RES (N6-acetyllysine; alternate.);MOD_RES (N6-succinyllysine; alternate (By similarity).);TRANSIT (Mitochondrion.)	CHAIN (60 kDa heat shock protein, mitochondrial.)	MOD_RES (N6-acetyllysine; alternate.);MOD_RES (N6-succinyllysine; alternate (By similarity).);MOD_RES (N6-acetyllysine.);MOD_RES (N6-acetyllysine; alternate (By similarity).);MOD_RES (N6-malonyllysine; alternate.);MOD_RES (N6-acetyllysine (By similarity).);MOD_RES (N6-succinyllysine (By similarity).);MOD_RES (Phosphoserine (By similarity).)				78
P10809	TPANEDQKIGIEIIKR	YES	60 kDa heat shock protein, mitochondrial	HSPD1;60 kDa heat shock protein, mitochondrial;60 kDa chaperonin ;Chaperonin 60 Short=CPN60 ;Heat shock protein 60 Short=HSP-60 Short=Hsp60 ;HuCHA60 ;Mitochondrial matrix protein P1 ;P60 lymphocyte protein;CH60;	(Human)	2	LRCIPALDSL	TPANEDQKIG	455	573				MEP1A;MEP1B	Subtiligase Based Positive Selection		MOD_RES (N6-succinyllysine (By similarity).);MOD_RES (Phosphoserine.);MOD_RES (N6-acetyllysine (By similarity).);MOD_RES (N6-acetyllysine; alternate.);MOD_RES (N6-succinyllysine; alternate (By similarity).);MOD_RES (N6-acetyllysine.);MOD_RES (N6-acetyllysine; alternate (By similarity).);MOD_RES (N6-malonyllysine; alternate.);MOD_RES (Phosphoserine (By similarity).);TRANSIT (Mitochondrion.)	CHAIN (60 kDa heat shock protein, mitochondrial.)	MOD_RES (N6-acetyllysine.);MOD_RES (N6-acetyllysine; alternate (By similarity).);MOD_RES (N6-succinyllysine; alternate (By similarity).)				428
P10809	TSDVEVNEKKDR	YES	60 kDa heat shock protein, mitochondrial	HSPD1;60 kDa heat shock protein, mitochondrial;60 kDa chaperonin ;Chaperonin 60 Short=CPN60 ;Heat shock protein 60 Short=HSP-60 Short=Hsp60 ;HuCHA60 ;Mitochondrial matrix protein P1 ;P60 lymphocyte protein;CH60;	(Human)	2	DGVAVLKVGG	TSDVEVNEKK	409	573				CATS;CATL1	Subtiligase Based Positive Selection		MOD_RES (N6-succinyllysine (By similarity).);MOD_RES (Phosphoserine.);MOD_RES (N6-acetyllysine (By similarity).);MOD_RES (N6-acetyllysine; alternate.);MOD_RES (N6-succinyllysine; alternate (By similarity).);MOD_RES (N6-acetyllysine.);MOD_RES (N6-acetyllysine; alternate (By similarity).);MOD_RES (N6-malonyllysine; alternate.);TRANSIT (Mitochondrion.)	CHAIN (60 kDa heat shock protein, mitochondrial.)	MOD_RES (Phosphoserine (By similarity).);MOD_RES (N6-acetyllysine.);MOD_RES (N6-acetyllysine; alternate (By similarity).);MOD_RES (N6-succinyllysine; alternate (By similarity).)				382
P10809	TSEYEKEKLNER	YES	60 kDa heat shock protein, mitochondrial	HSPD1;60 kDa heat shock protein, mitochondrial;60 kDa chaperonin ;Chaperonin 60 Short=CPN60 ;Heat shock protein 60 Short=HSP-60 Short=Hsp60 ;HuCHA60 ;Mitochondrial matrix protein P1 ;P60 lymphocyte protein;CH60;	(Human)	2	QEIIEQLDVT	TSEYEKEKLN	382	573				MEP1A;CATS			MOD_RES (N6-succinyllysine (By similarity).);MOD_RES (Phosphoserine.);MOD_RES (N6-acetyllysine (By similarity).);MOD_RES (N6-acetyllysine; alternate.);MOD_RES (N6-succinyllysine; alternate (By similarity).);MOD_RES (N6-acetyllysine.);MOD_RES (N6-acetyllysine; alternate (By similarity).);MOD_RES (N6-malonyllysine; alternate.);TRANSIT (Mitochondrion.)	CHAIN (60 kDa heat shock protein, mitochondrial.)	MOD_RES (N6-acetyllysine (By similarity).);MOD_RES (N6-acetyllysine; alternate.);MOD_RES (N6-succinyllysine; alternate (By similarity).);MOD_RES (Phosphoserine (By similarity).);MOD_RES (N6-acetyllysine.);MOD_RES (N6-acetyllysine; alternate (By similarity).)				355
P10809	TTATVLAR	YES	60 kDa heat shock protein, mitochondrial	HSPD1;60 kDa heat shock protein, mitochondrial;60 kDa chaperonin ;Chaperonin 60 Short=CPN60 ;Heat shock protein 60 Short=HSP-60 Short=Hsp60 ;HuCHA60 ;Mitochondrial matrix protein P1 ;P60 lymphocyte protein;CH60;	(Human)	2	NTNEEAGDGT	TTATVLARSI	114	573					Subtiligase Based Positive Selection		MOD_RES (N6-succinyllysine (By similarity).);MOD_RES (Phosphoserine.);MOD_RES (N6-acetyllysine (By similarity).);MOD_RES (N6-acetyllysine; alternate.);MOD_RES (N6-succinyllysine; alternate (By similarity).);TRANSIT (Mitochondrion.)	CHAIN (60 kDa heat shock protein, mitochondrial.)	MOD_RES (N6-acetyllysine; alternate.);MOD_RES (N6-succinyllysine; alternate (By similarity).);MOD_RES (N6-acetyllysine.);MOD_RES (N6-acetyllysine; alternate (By similarity).);MOD_RES (N6-malonyllysine; alternate.);MOD_RES (N6-acetyllysine (By similarity).);MOD_RES (N6-succinyllysine (By similarity).);MOD_RES (Phosphoserine (By similarity).)				87
P10809	TTTATVLAR	YES	60 kDa heat shock protein, mitochondrial	HSPD1;60 kDa heat shock protein, mitochondrial;60 kDa chaperonin ;Chaperonin 60 Short=CPN60 ;Heat shock protein 60 Short=HSP-60 Short=Hsp60 ;HuCHA60 ;Mitochondrial matrix protein P1 ;P60 lymphocyte protein;CH60;	(Human)	2	NNTNEEAGDG	TTTATVLARS	113	573					Subtiligase Based Positive Selection		MOD_RES (N6-succinyllysine (By similarity).);MOD_RES (Phosphoserine.);MOD_RES (N6-acetyllysine (By similarity).);MOD_RES (N6-acetyllysine; alternate.);MOD_RES (N6-succinyllysine; alternate (By similarity).);TRANSIT (Mitochondrion.)	CHAIN (60 kDa heat shock protein, mitochondrial.)	MOD_RES (N6-acetyllysine; alternate.);MOD_RES (N6-succinyllysine; alternate (By similarity).);MOD_RES (N6-acetyllysine.);MOD_RES (N6-acetyllysine; alternate (By similarity).);MOD_RES (N6-malonyllysine; alternate.);MOD_RES (N6-acetyllysine (By similarity).);MOD_RES (N6-succinyllysine (By similarity).);MOD_RES (Phosphoserine (By similarity).)				86
P10809	VTDALNATR	YES	60 kDa heat shock protein, mitochondrial	HSPD1;60 kDa heat shock protein, mitochondrial;60 kDa chaperonin ;Chaperonin 60 Short=CPN60 ;Heat shock protein 60 Short=HSP-60 Short=Hsp60 ;HuCHA60 ;Mitochondrial matrix protein P1 ;P60 lymphocyte protein;CH60;	(Human)	2	DVEVNEKKDR	VTDALNATRA	421	573							MOD_RES (N6-succinyllysine (By similarity).);MOD_RES (Phosphoserine.);MOD_RES (N6-acetyllysine (By similarity).);MOD_RES (N6-acetyllysine; alternate.);MOD_RES (N6-succinyllysine; alternate (By similarity).);MOD_RES (N6-acetyllysine.);MOD_RES (N6-acetyllysine; alternate (By similarity).);MOD_RES (N6-malonyllysine; alternate.);MOD_RES (Phosphoserine (By similarity).);TRANSIT (Mitochondrion.)	CHAIN (60 kDa heat shock protein, mitochondrial.)	MOD_RES (N6-acetyllysine.);MOD_RES (N6-acetyllysine; alternate (By similarity).);MOD_RES (N6-succinyllysine; alternate (By similarity).)				394
P10809	YAKDVKFGADAR	YES	60 kDa heat shock protein, mitochondrial	HSPD1;60 kDa heat shock protein, mitochondrial;60 kDa chaperonin ;Chaperonin 60 Short=CPN60 ;Heat shock protein 60 Short=HSP-60 Short=Hsp60 ;HuCHA60 ;Mitochondrial matrix protein P1 ;P60 lymphocyte protein;CH60;	(Human)	2	RVLAPHLTRA	YAKDVKFGAD	26	573	X	X			Subtiligase Based Positive Selection			TRANSIT (Mitochondrion.)	MOD_RES (N6-succinyllysine (By similarity).);MOD_RES (Phosphoserine.);MOD_RES (N6-acetyllysine (By similarity).);MOD_RES (N6-acetyllysine; alternate.);MOD_RES (N6-succinyllysine; alternate (By similarity).);MOD_RES (N6-acetyllysine.);MOD_RES (N6-acetyllysine; alternate (By similarity).);MOD_RES (N6-malonyllysine; alternate.);MOD_RES (Phosphoserine (By similarity).);CHAIN (60 kDa heat shock protei…				-1
P11047	AMDECTDEGGRPQR	YES	Laminin subunit gamma-1	LAMC1;Laminin subunit gamma-1;Laminin B2 chain ;Laminin-1 subunit gamma ;Laminin-10 subunit gamma ;Laminin-11 subunit gamma ;Laminin-2 subunit gamma ;Laminin-3 subunit gamma ;Laminin-4 subunit gamma ;Laminin-6 subunit gamma ;Laminin-7 subunit gamma ;Laminin-8 subunit gamma ;Laminin-9 subunit gamma ;S-laminin subunit gamma Short=S-LAM gamma;LAMC1;	(Human)	1	AAAAAGCAQA	AMDECTDEGG	36	1609	X	X					SIGNAL ()	CHAIN (Laminin subunit gamma-1.)	DISULFID (By similarity.);DISULFID (Interchain (Probable).);CARBOHYD (N-linked (GlcNAc...) (Potential).);CARBOHYD (N-linked (GlcNAc...).);COILED (Potential.);MOD_RES (Phosphoserine.);REGION (Domain II and I.);DOMAIN (Laminin N-terminal.);DOMAIN (Laminin EGF-like 1.);DOMAIN (Laminin EGF-like 2.);DOMAIN (Laminin EGF-like 3.);DOMAIN (Laminin EGF-like 4.);DOMAIN (Laminin EGF-like 5; first part.);DOMA…	2
P11177	DAINQGMDEELER	YES	Pyruvate dehydrogenase E1 component subunit beta, mitochondrial	PDHB;Pyruvate dehydrogenase E1 component subunit beta, mitochondrial;ODPB;	(Human)	3	APAALQVTVR	DAINQGMDEE	37	359					Subtiligase Based Positive Selection		TRANSIT (Mitochondrion.)	CHAIN (Pyruvate dehydrogenase E1 component subunit beta, mitochondrial.)	MOD_RES (Phosphotyrosine (By similarity).);MOD_RES (N6-acetyllysine (By similarity).);BINDING (Thiamine pyrophosphate.)				6
P11177	IMEGPAFNFLDAPAVR	YES	Pyruvate dehydrogenase E1 component subunit beta, mitochondrial	PDHB;Pyruvate dehydrogenase E1 component subunit beta, mitochondrial;ODPB;	(Human)	3	FGVGAEICAR	IMEGPAFNFL	309	359							MOD_RES (Phosphotyrosine (By similarity).);TRANSIT (Mitochondrion.);BINDING (Thiamine pyrophosphate.)	CHAIN (Pyruvate dehydrogenase E1 component subunit beta, mitochondrial.)	MOD_RES (N6-acetyllysine (By similarity).)				278
P11310	PVVAAGAVGLAQR	YES	Medium-chain specific acyl-CoA dehydrogenase, mitochondrial	ACADM;Medium-chain specific acyl-CoA dehydrogenase, mitochondrial;ACADM;	(Human)	1	VAMGAFDKTR	PVVAAGAVGL	282	421							NP_BIND (FAD.);MOD_RES (N6-acetyllysine; alternate (By similarity).);MOD_RES (N6-succinyllysine; alternate (By similarity).);MOD_RES (N6-succinyllysine (By similarity).);MOD_RES (N6-acetyllysine.);MUTAGEN (L->M: Strongly reduced rate of electron transfer to ETF.);MUTAGEN (L->W: Strongly reduced rate of electron transfer to ETF.);MUTAGEN (L->Y: Strongly reduced rate of electron transfer to ETF.);M…	CHAIN (Medium-chain specific acyl-CoA dehydrogenase, mitochondrial.)	NP_BIND (FAD.);MOD_RES (N6-acetyllysine.);ACT_SITE (Proton acceptor.);MUTAGEN (E->A: Reduces rate of electron transfer to ETF three-fold.);MUTAGEN (E->Q: Reduces rate of electron transfer to ETF two-fold.);BINDING (Substrate; via amide nitrogen.);BINDING (Substrate.)				256
P11498	ADFAQACQDAGVR	YES	Pyruvate carboxylase, mitochondrial	PC;Pyruvate carboxylase, mitochondrial;Pyruvic carboxylase Short=PCB;PYC;	(Human)	11	HPGYGFLSER	ADFAQACQDA	125	1178							MOD_RES (N6-acetyllysine; alternate (By similarity).);MOD_RES (N6-succinyllysine; alternate (By similarity).);TRANSIT (Mitochondrion (Potential).)	DOMAIN (Biotin carboxylation.);CHAIN (Pyruvate carboxylase, mitochondrial.)	MOD_RES (N6-acetyllysine (By similarity).);MOD_RES (N6-succinyllysine (By similarity).);MOD_RES (N6-carboxylysine.);MOD_RES (N6-acetyllysine.);MOD_RES (N6-biotinyllysine.);ACT_SITE (By similarity.);REGION (Substrate binding.);METAL (Manganese.);METAL (Manganese; via carbamate group.);DOMAIN (ATP-grasp.);DOMAIN (Carboxyltransferase.);DOMAIN (Biotinyl-binding.);MUTAGEN (F->A,E: Loss of tetramerizat…				104
P11498	DAHQSLLATR	YES	Pyruvate carboxylase, mitochondrial	PC;Pyruvate carboxylase, mitochondrial;Pyruvic carboxylase Short=PCB;PYC;	(Human)	11	GLLLMDTTFR	DAHQSLLATR	572	1178							MOD_RES (N6-acetyllysine; alternate (By similarity).);MOD_RES (N6-succinyllysine; alternate (By similarity).);MOD_RES (N6-acetyllysine (By similarity).);MOD_RES (N6-succinyllysine (By similarity).);ACT_SITE (By similarity.);DOMAIN (Biotin carboxylation.);DOMAIN (ATP-grasp.);TRANSIT (Mitochondrion (Potential).);BINDING (ATP (By similarity).)	REGION (Substrate binding.);DOMAIN (Carboxyltransferase.);CHAIN (Pyruvate carboxylase, mitochondrial.)	MOD_RES (N6-acetyllysine (By similarity).);MOD_RES (N6-carboxylysine.);MOD_RES (N6-acetyllysine.);MOD_RES (N6-biotinyllysine.);METAL (Manganese.);METAL (Manganese; via carbamate group.);DOMAIN (Biotinyl-binding.);MUTAGEN (F->A,E: Loss of tetramerization and enzyme activity, resulting in an inactive homodimer.);BINDING (Substrate.)				551
P11498	NGLSR	YES	Pyruvate carboxylase, mitochondrial	PC;Pyruvate carboxylase, mitochondrial;Pyruvic carboxylase Short=PCB;PYC;	(Human)	11	VGDLAQFMVQ	NGLSRAEAEA	924	1178							MOD_RES (N6-acetyllysine; alternate (By similarity).);MOD_RES (N6-succinyllysine; alternate (By similarity).);MOD_RES (N6-acetyllysine (By similarity).);MOD_RES (N6-succinyllysine (By similarity).);MOD_RES (N6-carboxylysine.);ACT_SITE (By similarity.);REGION (Substrate binding.);METAL (Manganese.);METAL (Manganese; via carbamate group.);DOMAIN (Biotin carboxylation.);DOMAIN (ATP-grasp.);DOMAIN (C…	CHAIN (Pyruvate carboxylase, mitochondrial.)	MOD_RES (N6-acetyllysine (By similarity).);MOD_RES (N6-acetyllysine.);MOD_RES (N6-biotinyllysine.);DOMAIN (Biotinyl-binding.);MUTAGEN (F->A,E: Loss of tetramerization and enzyme activity, resulting in an inactive homodimer.)				903
P11498	SFQPDTGR	YES	Pyruvate carboxylase, mitochondrial	PC;Pyruvate carboxylase, mitochondrial;Pyruvic carboxylase Short=PCB;PYC;	(Human)	11	CRVTTEDPAR	SFQPDTGRIE	386	1178							MOD_RES (N6-acetyllysine; alternate (By similarity).);MOD_RES (N6-succinyllysine; alternate (By similarity).);MOD_RES (N6-acetyllysine (By similarity).);ACT_SITE (By similarity.);DOMAIN (ATP-grasp.);TRANSIT (Mitochondrion (Potential).);BINDING (ATP (By similarity).)	DOMAIN (Biotin carboxylation.);CHAIN (Pyruvate carboxylase, mitochondrial.)	MOD_RES (N6-acetyllysine (By similarity).);MOD_RES (N6-succinyllysine (By similarity).);MOD_RES (N6-carboxylysine.);MOD_RES (N6-acetyllysine.);MOD_RES (N6-biotinyllysine.);REGION (Substrate binding.);METAL (Manganese.);METAL (Manganese; via carbamate group.);DOMAIN (Carboxyltransferase.);DOMAIN (Biotinyl-binding.);MUTAGEN (F->A,E: Loss of tetramerization and enzyme activity, resulting in an inact…				365
P11498	TSTAPAASPN	YES	Pyruvate carboxylase, mitochondrial	PC;Pyruvate carboxylase, mitochondrial;Pyruvic carboxylase Short=PCB;PYC;	(Human)	11	GGLRLLGIRR	TSTAPAASPN	19	1178	X	X			Subtiligase Based Positive Selection;unknown			TRANSIT (Mitochondrion (Potential).)	MOD_RES (N6-acetyllysine; alternate (By similarity).);MOD_RES (N6-succinyllysine; alternate (By similarity).);MOD_RES (N6-acetyllysine (By similarity).);MOD_RES (N6-succinyllysine (By similarity).);MOD_RES (N6-carboxylysine.);MOD_RES (N6-acetyllysine.);MOD_RES (N6-biotinyllysine.);ACT_SITE (By similarity.);REGION (Substrate binding.);METAL (Manganese.);METAL (Manganese; via carbamate group.);DOMA…				-2
P11498	TSTAPAASPNVR	YES	Pyruvate carboxylase, mitochondrial	PC;Pyruvate carboxylase, mitochondrial;Pyruvic carboxylase Short=PCB;PYC;	(Human)	11	GGLRLLGIRR	TSTAPAASPN	19	1178	X	X			Subtiligase Based Positive Selection;unknown			TRANSIT (Mitochondrion (Potential).)	MOD_RES (N6-acetyllysine; alternate (By similarity).);MOD_RES (N6-succinyllysine; alternate (By similarity).);MOD_RES (N6-acetyllysine (By similarity).);MOD_RES (N6-succinyllysine (By similarity).);MOD_RES (N6-carboxylysine.);MOD_RES (N6-acetyllysine.);MOD_RES (N6-biotinyllysine.);ACT_SITE (By similarity.);REGION (Substrate binding.);METAL (Manganese.);METAL (Manganese; via carbamate group.);DOMA…				-2
P12235	LAADVGKGAAQR	YES	ADP/ATP translocase 1	SLC25A4;ADP/ATP translocase 1;ADP,ATP carrier protein 1 ;ADP,ATP carrier protein, heart/skeletal muscle isoform T1 ;Adenine nucleotide translocator 1 Short=ANT 1 ;Solute carrier family 25 member 4;ADT1;	(Human)	4	VYPLDFARTR	LAADVGKGAA	141	298							CROSSLNK (Glycyl lysine isopeptide (Lys-Gly) (interchain with G-Cter in ubiquitin) (By similarity).);REPEAT (Solcar 1.);TRANSMEM (Helical; Name=1; (By similarity).);TRANSMEM (Helical; Name=2; (By similarity).);INIT_MET (Removed.);MOD_RES (N-acetylglycine.);BINDING (Nucleotide (By similarity).)	REPEAT (Solcar 2.);TRANSMEM (Helical; Name=3; (By similarity).);CHAIN (ADP/ATP translocase 1.)	MOTIF (Substrate recognition (By similarity).);REPEAT (Solcar 3.);TRANSMEM (Helical; Name=4; (By similarity).);TRANSMEM (Helical; Name=5; (By similarity).);TRANSMEM (Helical; Name=6; (By similarity).);MOD_RES (N6-succinyllysine (By similarity).);MOD_RES (S-nitrosocysteine (By similarity).)			101
P12236	ANVIR	YES	ADP/ATP translocase 3	SLC25A6;ADP/ATP translocase 3;ADP,ATP carrier protein 3 ;ADP,ATP carrier protein, isoform T2 Short=ANT 2 ;Adenine nucleotide translocator 3 Short=ANT 3 ;Solute carrier family 25 member 6;ADT3;	(Human)	X	GVLSFWRGNL	ANVIRYFPTQ	76	298							TRANSMEM (Helical; Name=1; (By similarity).);INIT_MET (Removed; alternate.);MOD_RES (N-acetylmethionine.);MOD_RES (N-acetylthreonine; in ADP/ATP translocase 3, N-terminally processed.)	REPEAT (Solcar 1.);TRANSMEM (Helical; Name=2; (By similarity).);CHAIN (ADP/ATP translocase 3.);CHAIN (ADP/ATP translocase 3, N-terminally processed.)	MOTIF (Substrate recognition (By similarity).);REPEAT (Solcar 2.);REPEAT (Solcar 3.);TRANSMEM (Helical; Name=3; (By similarity).);TRANSMEM (Helical; Name=4; (By similarity).);TRANSMEM (Helical; Name=5; (By similarity).);TRANSMEM (Helical; Name=6; (By similarity).);MOD_RES (N6-acetyllysine.);BINDING (Nucleotide (By similarity).)			36
P12236	GNLANVIR	YES	ADP/ATP translocase 3	SLC25A6;ADP/ATP translocase 3;ADP,ATP carrier protein 3 ;ADP,ATP carrier protein, isoform T2 Short=ANT 2 ;Adenine nucleotide translocator 3 Short=ANT 3 ;Solute carrier family 25 member 6;ADT3;	(Human)	X	KEQGVLSFWR	GNLANVIRYF	73	298							TRANSMEM (Helical; Name=1; (By similarity).);INIT_MET (Removed; alternate.);MOD_RES (N-acetylmethionine.);MOD_RES (N-acetylthreonine; in ADP/ATP translocase 3, N-terminally processed.)	REPEAT (Solcar 1.);CHAIN (ADP/ATP translocase 3.);CHAIN (ADP/ATP translocase 3, N-terminally processed.)	MOTIF (Substrate recognition (By similarity).);REPEAT (Solcar 2.);REPEAT (Solcar 3.);TRANSMEM (Helical; Name=2; (By similarity).);TRANSMEM (Helical; Name=3; (By similarity).);TRANSMEM (Helical; Name=4; (By similarity).);TRANSMEM (Helical; Name=5; (By similarity).);TRANSMEM (Helical; Name=6; (By similarity).);MOD_RES (N6-acetyllysine.);BINDING (Nucleotide (By similarity).)			33
P12236	KGADIMYTGTVDCWR	YES	ADP/ATP translocase 3	SLC25A6;ADP/ATP translocase 3;ADP,ATP carrier protein 3 ;ADP,ATP carrier protein, isoform T2 Short=ANT 2 ;Adenine nucleotide translocator 3 Short=ANT 3 ;Solute carrier family 25 member 6;ADT3;	(Human)	X	RRRMMMQSGR	KGADIMYTGT	245	298							MOTIF (Substrate recognition (By similarity).);REPEAT (Solcar 1.);REPEAT (Solcar 2.);TRANSMEM (Helical; Name=1; (By similarity).);TRANSMEM (Helical; Name=2; (By similarity).);TRANSMEM (Helical; Name=3; (By similarity).);TRANSMEM (Helical; Name=4; (By similarity).);TRANSMEM (Helical; Name=5; (By similarity).);INIT_MET (Removed; alternate.);MOD_RES (N-acetylmethionine.);MOD_RES (N-acetylthreonine; …	REPEAT (Solcar 3.);CHAIN (ADP/ATP translocase 3.);CHAIN (ADP/ATP translocase 3, N-terminally processed.)	TRANSMEM (Helical; Name=6; (By similarity).);MOD_RES (N6-acetyllysine.)			205
P12236	LAADVGKSGTER	YES	ADP/ATP translocase 3	SLC25A6;ADP/ATP translocase 3;ADP,ATP carrier protein 3 ;ADP,ATP carrier protein, isoform T2 Short=ANT 2 ;Adenine nucleotide translocator 3 Short=ANT 3 ;Solute carrier family 25 member 6;ADT3;	(Human)	X	VYPLDFARTR	LAADVGKSGT	141	298							REPEAT (Solcar 1.);TRANSMEM (Helical; Name=1; (By similarity).);TRANSMEM (Helical; Name=2; (By similarity).);INIT_MET (Removed; alternate.);MOD_RES (N-acetylmethionine.);MOD_RES (N-acetylthreonine; in ADP/ATP translocase 3, N-terminally processed.);MOD_RES (N6-acetyllysine.);BINDING (Nucleotide (By similarity).)	REPEAT (Solcar 2.);TRANSMEM (Helical; Name=3; (By similarity).);CHAIN (ADP/ATP translocase 3.);CHAIN (ADP/ATP translocase 3, N-terminally processed.)	MOTIF (Substrate recognition (By similarity).);REPEAT (Solcar 3.);TRANSMEM (Helical; Name=4; (By similarity).);TRANSMEM (Helical; Name=5; (By similarity).);TRANSMEM (Helical; Name=6; (By similarity).);MOD_RES (N6-acetyllysine.)			101
P12236	TRLAADVGKSGTER	YES	ADP/ATP translocase 3	SLC25A6;ADP/ATP translocase 3;ADP,ATP carrier protein 3 ;ADP,ATP carrier protein, isoform T2 Short=ANT 2 ;Adenine nucleotide translocator 3 Short=ANT 3 ;Solute carrier family 25 member 6;ADT3;	(Human)	X	CFVYPLDFAR	TRLAADVGKS	139	298							REPEAT (Solcar 1.);TRANSMEM (Helical; Name=1; (By similarity).);TRANSMEM (Helical; Name=2; (By similarity).);INIT_MET (Removed; alternate.);MOD_RES (N-acetylmethionine.);MOD_RES (N-acetylthreonine; in ADP/ATP translocase 3, N-terminally processed.);MOD_RES (N6-acetyllysine.);BINDING (Nucleotide (By similarity).)	REPEAT (Solcar 2.);TRANSMEM (Helical; Name=3; (By similarity).);CHAIN (ADP/ATP translocase 3.);CHAIN (ADP/ATP translocase 3, N-terminally processed.)	MOTIF (Substrate recognition (By similarity).);REPEAT (Solcar 3.);TRANSMEM (Helical; Name=4; (By similarity).);TRANSMEM (Helical; Name=5; (By similarity).);TRANSMEM (Helical; Name=6; (By similarity).);MOD_RES (N6-acetyllysine.)			99
P13073	AHESVVKSEDFSLPAYMDR	YES	Cytochrome c oxidase subunit 4 isoform 1, mitochondrial	COX4I1;Cytochrome c oxidase subunit 4 isoform 1, mitochondrial;Cytochrome c oxidase polypeptide IV ;Cytochrome c oxidase subunit IV isoform 1 Short=COX IV-1;COX41;	(Human)	16	RAISTSVCVR	AHESVVKSED	23	169	X	X			unknown;Subtiligase Based Positive Selection		TRANSIT (Mitochondrion.)		MOD_RES (N6-acetyllysine; alternate (By similarity).);MOD_RES (N6-succinyllysine; alternate (By similarity).);MOD_RES (N6-acetyllysine.);MOD_RES (N6-acetyllysine; alternate.);MOD_RES (N6-acetyllysine (By similarity).);CHAIN (Cytochrome c oxidase subunit 4 isoform 1, mitochondrial.)				0
P13073	SEDFSLPAYMDR	YES	Cytochrome c oxidase subunit 4 isoform 1, mitochondrial	COX4I1;Cytochrome c oxidase subunit 4 isoform 1, mitochondrial;Cytochrome c oxidase polypeptide IV ;Cytochrome c oxidase subunit IV isoform 1 Short=COX IV-1;COX41;	(Human)	16	CVRAHESVVK	SEDFSLPAYM	30	169							MOD_RES (N6-acetyllysine; alternate (By similarity).);MOD_RES (N6-succinyllysine; alternate (By similarity).);TRANSIT (Mitochondrion.)	CHAIN (Cytochrome c oxidase subunit 4 isoform 1, mitochondrial.)	MOD_RES (N6-acetyllysine.);MOD_RES (N6-acetyllysine; alternate.);MOD_RES (N6-succinyllysine; alternate (By similarity).);MOD_RES (N6-acetyllysine (By similarity).)				7
P13995	EAVVISGR	YES	Bifunctional methylenetetrahydrofolate dehydrogenase/cyclohydrolase, mitochondrial	MTHFD2;Bifunctional methylenetetrahydrofolate dehydrogenase/cyclohydrolase, mitochondrial;NAD-dependent methylenetetrahydrofolate dehydrogenase EC=1.5.1.15 Includes: ;Methenyltetrahydrofolate cyclohydrolase EC=3.5.4.9 Flags: Precursor;MTDC;	(Human)	2	RPFHLAAVRN	EAVVISGRKL	36	350	X	X					TRANSIT (Mitochondrion (By similarity).)		CHAIN (Bifunctional methylenetetrahydrofolate dehydrogenase/cyclohydrolase, mitochondrial.);MOD_RES (N6-acetyllysine.)				0
P18077	DETEFYLGKR	YES	60S ribosomal protein L35a	RPL35A;60S ribosomal protein L35a;Cell growth-inhibiting gene 33 protein;RL35A;	(Human)	3	LLKIEGVYAR	DETEFYLGKR	37	110							MOD_RES (N6-acetyllysine.)	CHAIN (60S ribosomal protein L35a.)	MOD_RES (N6-acetyllysine; alternate (By similarity).);MOD_RES (N6-succinyllysine; alternate (By similarity).)
P19404	GAGGALFVHR	YES	NADH dehydrogenase [ubiquinone] flavoprotein 2, mitochondrial	NDUFV2;NADH dehydrogenase [ubiquinone] flavoprotein 2, mitochondrial;NADH-ubiquinone oxidoreductase 24 kDa subunit;NDUV2;	(Human)	18	RNLHKTVMQN	GAGGALFVHR	33	249	X	X			unknown;Subtiligase Based Positive Selection	X	TRANSIT (Mitochondrion.)		CHAIN (NADH dehydrogenase [ubiquinone] flavoprotein 2, mitochondrial.);METAL (Iron-sulfur (2Fe-2S) (Potential).);MOD_RES (N6-acetyllysine (By similarity).);MOD_RES (Phosphotyrosine; by SRC.)				0
P20674	NKPDIDAWELR	YES	Cytochrome c oxidase subunit 5A, mitochondrial	COX5A;Cytochrome c oxidase subunit 5A, mitochondrial;Cytochrome c oxidase polypeptide Va;COX5A;	(Human)	15	EFDARWVTYF	NKPDIDAWEL	61	150							TRANSIT (Mitochondrion.)	CHAIN (Cytochrome c oxidase subunit 5A, mitochondrial.)	MOD_RES (N6-acetyllysine (By similarity).)				19
P20674	SHGSQETDEEFDAR	YES	Cytochrome c oxidase subunit 5A, mitochondrial	COX5A;Cytochrome c oxidase subunit 5A, mitochondrial;Cytochrome c oxidase polypeptide Va;COX5A;	(Human)	15	AVAIQSVRCY	SHGSQETDEE	42	150	X	X			Subtiligase Based Positive Selection;unknown		TRANSIT (Mitochondrion.)		MOD_RES (N6-acetyllysine (By similarity).);CHAIN (Cytochrome c oxidase subunit 5A, mitochondrial.)				0
P20674	YSHGSQETDEEFDAR	YES	Cytochrome c oxidase subunit 5A, mitochondrial	COX5A;Cytochrome c oxidase subunit 5A, mitochondrial;Cytochrome c oxidase polypeptide Va;COX5A;	(Human)	15	PAVAIQSVRC	YSHGSQETDE	41	150	X	X			Subtiligase Based Positive Selection;unknown			TRANSIT (Mitochondrion.)	MOD_RES (N6-acetyllysine (By similarity).);CHAIN (Cytochrome c oxidase subunit 5A, mitochondrial.)				-1
P21953	VAHFTFQPDPEPR	YES	2-oxoisovalerate dehydrogenase subunit beta, mitochondrial	BCKDHB;2-oxoisovalerate dehydrogenase subunit beta, mitochondrial;Branched-chain alpha-keto acid dehydrogenase E1 component beta chain Short=BCKDE1B Short=BCKDH E1-beta;ODBB;	(Human)	6	TVEDAAQRRQ	VAHFTFQPDP	51	392	X	X			Subtiligase Based Positive Selection		TRANSIT (Mitochondrion.)		CHAIN (2-oxoisovalerate dehydrogenase subunit beta, mitochondrial.);MOD_RES (N6-acetyllysine (By similarity).);MOD_RES (N6-acetyllysine.)				0
P23368	LFTPDVIR	YES	NAD-dependent malic enzyme, mitochondrial	ME2;NAD-dependent malic enzyme, mitochondrial;Malic enzyme 2;MAOM;	(Human)	18	TIIGVAGAGR	LFTPDVIRAM	398	584							METAL (Divalent metal cation.);MOD_RES (N6-acetyllysine.);NP_BIND (NAD.);TRANSIT (Mitochondrion.);BINDING (Allosteric activator.);BINDING (Substrate.);BINDING (NAD.);ACT_SITE (Proton donor.);ACT_SITE (Proton acceptor.);MUTAGEN (R->S: Abolishes activation by fumarate.);MUTAGEN (R->T: Abolishes activation by fumarate.);SITE (Important for activity (By similarity).)	CHAIN (NAD-dependent malic enzyme, mitochondrial.)	BINDING (Substrate.)				379
P23786	LSAGSGPGQYLQR	YES	Carnitine O-palmitoyltransferase 2, mitochondrial	CPT2;Carnitine O-palmitoyltransferase 2, mitochondrial;Carnitine palmitoyltransferase II Short=CPT II;CPT2;	(Human)	1	AVGPGAPSRP	LSAGSGPGQY	25	658	X	X			Subtiligase Based Positive Selection;unknown			TRANSIT (Mitochondrion.)	TOPO_DOM (Mitochondrial matrix (By similarity).);INTRAMEM (Note=Mitochondrial inner membrane; (By similarity).);MOD_RES (N6-succinyllysine (By similarity).);MOD_RES (N6-acetyllysine (By similarity).);MOD_RES (N6-acetyllysine; alternate (By similarity).);MOD_RES (N6-succinyllysine; alternate (By similarity).);ACT_SITE (Proton acceptor (By similarity).);CHAIN (Carnitine O-palmitoyltransferase 2, mi…				-1
P23786	SAGSGPGQYLQR	YES	Carnitine O-palmitoyltransferase 2, mitochondrial	CPT2;Carnitine O-palmitoyltransferase 2, mitochondrial;Carnitine palmitoyltransferase II Short=CPT II;CPT2;	(Human)	1	VGPGAPSRPL	SAGSGPGQYL	26	658	X	X			Subtiligase Based Positive Selection;unknown		TRANSIT (Mitochondrion.)		TOPO_DOM (Mitochondrial matrix (By similarity).);INTRAMEM (Note=Mitochondrial inner membrane; (By similarity).);MOD_RES (N6-succinyllysine (By similarity).);MOD_RES (N6-acetyllysine (By similarity).);MOD_RES (N6-acetyllysine; alternate (By similarity).);MOD_RES (N6-succinyllysine; alternate (By similarity).);ACT_SITE (Proton acceptor (By similarity).);CHAIN (Carnitine O-palmitoyltransferase 2, mi…				0
P24752	MGNVLQGGEGQAPTR	YES	Acetyl-CoA acetyltransferase, mitochondrial	ACAT1;Acetyl-CoA acetyltransferase, mitochondrial;Acetoacetyl-CoA thiolase ;T2;THIL;	(Human)	11	IPKEEVKEAY	MGNVLQGGEG	91	427			X				MOD_RES (N6-acetyllysine; alternate (By similarity).);MOD_RES (N6-succinyllysine; alternate (By similarity).);MOD_RES (N6-succinyllysine (By similarity).);TRANSIT (Mitochondrion (By similarity).)	CHAIN (Acetyl-CoA acetyltransferase, mitochondrial.)	MOD_RES (N6-acetyllysine; alternate.);MOD_RES (N6-succinyllysine; alternate (By similarity).);MOD_RES (N6-acetyllysine; alternate (By similarity).);MOD_RES (N6-succinyllysine (By similarity).);MOD_RES (N6-acetyllysine.);MOD_RES (N6-acetyllysine (By similarity).);ACT_SITE (Acyl-thioester intermediate (Probable).);ACT_SITE (Proton acceptor (Probable).);REGION (Coenzyme A binding.);METAL (Potassium.…				57
P24752	NEQDAYAINSYTR	YES	Acetyl-CoA acetyltransferase, mitochondrial	ACAT1;Acetyl-CoA acetyltransferase, mitochondrial;Acetoacetyl-CoA thiolase ;T2;THIL;	(Human)	11	NTAKKLNIAR	NEQDAYAINS	209	427							MOD_RES (N6-acetyllysine; alternate (By similarity).);MOD_RES (N6-succinyllysine; alternate (By similarity).);MOD_RES (N6-succinyllysine (By similarity).);MOD_RES (N6-acetyllysine; alternate.);ACT_SITE (Acyl-thioester intermediate (Probable).);TRANSIT (Mitochondrion (By similarity).)	CHAIN (Acetyl-CoA acetyltransferase, mitochondrial.)	MOD_RES (N6-acetyllysine; alternate (By similarity).);MOD_RES (N6-succinyllysine; alternate (By similarity).);MOD_RES (N6-succinyllysine (By similarity).);MOD_RES (N6-acetyllysine.);MOD_RES (N6-acetyllysine (By similarity).);MOD_RES (N6-acetyllysine; alternate.);ACT_SITE (Proton acceptor (Probable).);REGION (Coenzyme A binding.);METAL (Potassium.);METAL (Potassium; via carbonyl oxygen.);BINDING (…				175
P24752	VLQGGEGQAPTR	YES	Acetyl-CoA acetyltransferase, mitochondrial	ACAT1;Acetyl-CoA acetyltransferase, mitochondrial;Acetoacetyl-CoA thiolase ;T2;THIL;	(Human)	11	EEVKEAYMGN	VLQGGEGQAP	94	427			X	CATL1;CATS			MOD_RES (N6-acetyllysine; alternate (By similarity).);MOD_RES (N6-succinyllysine; alternate (By similarity).);MOD_RES (N6-succinyllysine (By similarity).);TRANSIT (Mitochondrion (By similarity).)	CHAIN (Acetyl-CoA acetyltransferase, mitochondrial.)	MOD_RES (N6-acetyllysine; alternate.);MOD_RES (N6-succinyllysine; alternate (By similarity).);MOD_RES (N6-acetyllysine; alternate (By similarity).);MOD_RES (N6-succinyllysine (By similarity).);MOD_RES (N6-acetyllysine.);MOD_RES (N6-acetyllysine (By similarity).);ACT_SITE (Acyl-thioester intermediate (Probable).);ACT_SITE (Proton acceptor (Probable).);REGION (Coenzyme A binding.);METAL (Potassium.…				60
P24752	VSKPTLKEVVIVSATR	YES	Acetyl-CoA acetyltransferase, mitochondrial	ACAT1;Acetyl-CoA acetyltransferase, mitochondrial;Acetoacetyl-CoA thiolase ;T2;THIL;	(Human)	11	QEIRYVERSY	VSKPTLKEVV	34	427	X	X			Subtiligase Based Positive Selection;unknown		TRANSIT (Mitochondrion (By similarity).)		MOD_RES (N6-acetyllysine; alternate (By similarity).);MOD_RES (N6-succinyllysine; alternate (By similarity).);MOD_RES (N6-succinyllysine (By similarity).);MOD_RES (N6-acetyllysine; alternate.);MOD_RES (N6-acetyllysine.);MOD_RES (N6-acetyllysine (By similarity).);ACT_SITE (Acyl-thioester intermediate (Probable).);ACT_SITE (Proton acceptor (Probable).);REGION (Coenzyme A binding.);METAL (Potassium.…				0
P25705	AIEEQVAVIYAGVR	YES	ATP synthase subunit alpha, mitochondrial	ATP5A1;ATP synthase subunit alpha, mitochondrial;ATPA;	(Human)	18	LLKQGQYSPM	AIEEQVAVIY	480	553							NP_BIND (ATP (By similarity).);SITE (Required for activity (By similarity).);MOD_RES (Pyrrolidone carboxylic acid (By similarity).);MOD_RES (Phosphoserine (By similarity).);MOD_RES (N6-acetyllysine (By similarity).);MOD_RES (N6-acetyllysine; alternate.);MOD_RES (N6-succinyllysine; alternate (By similarity).);MOD_RES (Phosphoserine.);MOD_RES (N6-acetyllysine; alternate (By similarity).);MOD_RES (N…	CHAIN (ATP synthase subunit alpha, mitochondrial.)	MOD_RES (N6-acetyllysine; alternate.);MOD_RES (N6-succinyllysine; alternate (By similarity).);MOD_RES (N6-acetyllysine; alternate (By similarity).);MOD_RES (N6-acetyllysine (By similarity).)				436
P25705	AQFGSDLDAATQQLLSR	YES	ATP synthase subunit alpha, mitochondrial	ATP5A1;ATP synthase subunit alpha, mitochondrial;ATPA;	(Human)	18	LAQYREVAAF	AQFGSDLDAA	447	553							NP_BIND (ATP (By similarity).);SITE (Required for activity (By similarity).);MOD_RES (Pyrrolidone carboxylic acid (By similarity).);MOD_RES (Phosphoserine (By similarity).);MOD_RES (N6-acetyllysine (By similarity).);MOD_RES (N6-acetyllysine; alternate.);MOD_RES (N6-succinyllysine; alternate (By similarity).);MOD_RES (Phosphoserine.);MOD_RES (N6-acetyllysine; alternate (By similarity).);MOD_RES (N…	CHAIN (ATP synthase subunit alpha, mitochondrial.)	MOD_RES (N6-acetyllysine; alternate.);MOD_RES (N6-succinyllysine; alternate (By similarity).);MOD_RES (N6-acetyllysine; alternate (By similarity).);MOD_RES (N6-acetyllysine (By similarity).)				403
P25705	DNGKHALIIYDDLSKQAVAYR	YES	ATP synthase subunit alpha, mitochondrial	ATP5A1;ATP synthase subunit alpha, mitochondrial;ATPA;	(Human)	18	SGCSMGEYFR	DNGKHALIIY	302	553							NP_BIND (ATP (By similarity).);MOD_RES (Pyrrolidone carboxylic acid (By similarity).);MOD_RES (Phosphoserine (By similarity).);MOD_RES (N6-acetyllysine (By similarity).);MOD_RES (N6-acetyllysine; alternate.);MOD_RES (N6-succinyllysine; alternate (By similarity).);MOD_RES (Phosphoserine.);MOD_RES (N6-acetyllysine; alternate (By similarity).);TRANSIT (Mitochondrion.)	CHAIN (ATP synthase subunit alpha, mitochondrial.)	SITE (Required for activity (By similarity).);MOD_RES (N6-acetyllysine; alternate (By similarity).);MOD_RES (N6-succinyllysine; alternate (By similarity).);MOD_RES (N6-acetyllysine.);MOD_RES (N6-acetyllysine; alternate.);MOD_RES (N6-acetyllysine (By similarity).)				258
P25705	EAYPGDVF	YES	ATP synthase subunit alpha, mitochondrial	ATP5A1;ATP synthase subunit alpha, mitochondrial;ATPA;	(Human)	18	SLLLRRPPGR	EAYPGDVFYL	335	553							NP_BIND (ATP (By similarity).);MOD_RES (Pyrrolidone carboxylic acid (By similarity).);MOD_RES (Phosphoserine (By similarity).);MOD_RES (N6-acetyllysine (By similarity).);MOD_RES (N6-acetyllysine; alternate.);MOD_RES (N6-succinyllysine; alternate (By similarity).);MOD_RES (Phosphoserine.);MOD_RES (N6-acetyllysine; alternate (By similarity).);TRANSIT (Mitochondrion.)	CHAIN (ATP synthase subunit alpha, mitochondrial.)	SITE (Required for activity (By similarity).);MOD_RES (N6-acetyllysine; alternate (By similarity).);MOD_RES (N6-succinyllysine; alternate (By similarity).);MOD_RES (N6-acetyllysine.);MOD_RES (N6-acetyllysine; alternate.);MOD_RES (N6-acetyllysine (By similarity).)				291
P25705	EAYPGDVFYLH	YES	ATP synthase subunit alpha, mitochondrial	ATP5A1;ATP synthase subunit alpha, mitochondrial;ATPA;	(Human)	18	SLLLRRPPGR	EAYPGDVFYL	335	553							NP_BIND (ATP (By similarity).);MOD_RES (Pyrrolidone carboxylic acid (By similarity).);MOD_RES (Phosphoserine (By similarity).);MOD_RES (N6-acetyllysine (By similarity).);MOD_RES (N6-acetyllysine; alternate.);MOD_RES (N6-succinyllysine; alternate (By similarity).);MOD_RES (Phosphoserine.);MOD_RES (N6-acetyllysine; alternate (By similarity).);TRANSIT (Mitochondrion.)	CHAIN (ATP synthase subunit alpha, mitochondrial.)	SITE (Required for activity (By similarity).);MOD_RES (N6-acetyllysine; alternate (By similarity).);MOD_RES (N6-succinyllysine; alternate (By similarity).);MOD_RES (N6-acetyllysine.);MOD_RES (N6-acetyllysine; alternate.);MOD_RES (N6-acetyllysine (By similarity).)				291
P25705	EAYPGDVFYLHSR	YES	ATP synthase subunit alpha, mitochondrial	ATP5A1;ATP synthase subunit alpha, mitochondrial;ATPA;	(Human)	18	SLLLRRPPGR	EAYPGDVFYL	335	553							NP_BIND (ATP (By similarity).);MOD_RES (Pyrrolidone carboxylic acid (By similarity).);MOD_RES (Phosphoserine (By similarity).);MOD_RES (N6-acetyllysine (By similarity).);MOD_RES (N6-acetyllysine; alternate.);MOD_RES (N6-succinyllysine; alternate (By similarity).);MOD_RES (Phosphoserine.);MOD_RES (N6-acetyllysine; alternate (By similarity).);TRANSIT (Mitochondrion.)	CHAIN (ATP synthase subunit alpha, mitochondrial.)	SITE (Required for activity (By similarity).);MOD_RES (N6-acetyllysine; alternate (By similarity).);MOD_RES (N6-succinyllysine; alternate (By similarity).);MOD_RES (N6-acetyllysine.);MOD_RES (N6-acetyllysine; alternate.);MOD_RES (N6-acetyllysine (By similarity).)				291
P25705	ELIIGDR	YES	ATP synthase subunit alpha, mitochondrial	ATP5A1;ATP synthase subunit alpha, mitochondrial;ATPA;	(Human)	18	SLVPIGRGQR	ELIIGDRQTG	208	553							MOD_RES (Pyrrolidone carboxylic acid (By similarity).);MOD_RES (Phosphoserine (By similarity).);MOD_RES (N6-acetyllysine (By similarity).);MOD_RES (N6-acetyllysine; alternate.);MOD_RES (N6-succinyllysine; alternate (By similarity).);MOD_RES (Phosphoserine.);MOD_RES (N6-acetyllysine; alternate (By similarity).);TRANSIT (Mitochondrion.)	CHAIN (ATP synthase subunit alpha, mitochondrial.)	NP_BIND (ATP (By similarity).);SITE (Required for activity (By similarity).);MOD_RES (N6-acetyllysine; alternate (By similarity).);MOD_RES (N6-succinyllysine; alternate (By similarity).);MOD_RES (N6-acetyllysine (By similarity).);MOD_RES (N6-acetyllysine; alternate.);MOD_RES (N6-acetyllysine.)				164
P25705	EPMQTGIKAVDSLVPIGR	YES	ATP synthase subunit alpha, mitochondrial	ATP5A1;ATP synthase subunit alpha, mitochondrial;ATPA;	(Human)	18	PGIIPRISVR	EPMQTGIKAV	187	553							MOD_RES (Pyrrolidone carboxylic acid (By similarity).);MOD_RES (Phosphoserine (By similarity).);MOD_RES (N6-acetyllysine (By similarity).);MOD_RES (N6-acetyllysine; alternate.);MOD_RES (N6-succinyllysine; alternate (By similarity).);MOD_RES (Phosphoserine.);MOD_RES (N6-acetyllysine; alternate (By similarity).);TRANSIT (Mitochondrion.)	CHAIN (ATP synthase subunit alpha, mitochondrial.)	NP_BIND (ATP (By similarity).);SITE (Required for activity (By similarity).);MOD_RES (N6-acetyllysine; alternate (By similarity).);MOD_RES (N6-succinyllysine; alternate (By similarity).);MOD_RES (N6-acetyllysine (By similarity).);MOD_RES (N6-acetyllysine; alternate.);MOD_RES (N6-acetyllysine.)				143
P25705	IIYDDLSKQAVAYR	YES	ATP synthase subunit alpha, mitochondrial	ATP5A1;ATP synthase subunit alpha, mitochondrial;ATPA;	(Human)	18	YFRDNGKHAL	IIYDDLSKQA	309	553							NP_BIND (ATP (By similarity).);MOD_RES (Pyrrolidone carboxylic acid (By similarity).);MOD_RES (Phosphoserine (By similarity).);MOD_RES (N6-acetyllysine (By similarity).);MOD_RES (N6-acetyllysine; alternate.);MOD_RES (N6-succinyllysine; alternate (By similarity).);MOD_RES (Phosphoserine.);MOD_RES (N6-acetyllysine; alternate (By similarity).);TRANSIT (Mitochondrion.)	CHAIN (ATP synthase subunit alpha, mitochondrial.)	SITE (Required for activity (By similarity).);MOD_RES (N6-acetyllysine; alternate (By similarity).);MOD_RES (N6-succinyllysine; alternate (By similarity).);MOD_RES (N6-acetyllysine.);MOD_RES (N6-acetyllysine; alternate.);MOD_RES (N6-acetyllysine (By similarity).)				265
P25705	ILGADTSVDLEETGR	YES	ATP synthase subunit alpha, mitochondrial	ATP5A1;ATP synthase subunit alpha, mitochondrial;ATPA;	(Human)	18	AEMSSILEER	ILGADTSVDL	59	553							MOD_RES (Pyrrolidone carboxylic acid (By similarity).);TRANSIT (Mitochondrion.)	CHAIN (ATP synthase subunit alpha, mitochondrial.)	NP_BIND (ATP (By similarity).);SITE (Required for activity (By similarity).);MOD_RES (Phosphoserine (By similarity).);MOD_RES (N6-acetyllysine (By similarity).);MOD_RES (N6-acetyllysine; alternate.);MOD_RES (N6-succinyllysine; alternate (By similarity).);MOD_RES (Phosphoserine.);MOD_RES (N6-acetyllysine; alternate (By similarity).);MOD_RES (N6-acetyllysine.)				15
P25705	IYVAIGQKRSTVAQLVKR	YES	ATP synthase subunit alpha, mitochondrial	ATP5A1;ATP synthase subunit alpha, mitochondrial;ATPA;	(Human)	18	GSDEKKKLYC	IYVAIGQKRS	245	553							NP_BIND (ATP (By similarity).);MOD_RES (Pyrrolidone carboxylic acid (By similarity).);MOD_RES (Phosphoserine (By similarity).);MOD_RES (N6-acetyllysine (By similarity).);MOD_RES (N6-acetyllysine; alternate.);MOD_RES (N6-succinyllysine; alternate (By similarity).);MOD_RES (Phosphoserine.);MOD_RES (N6-acetyllysine; alternate (By similarity).);TRANSIT (Mitochondrion.)	CHAIN (ATP synthase subunit alpha, mitochondrial.)	SITE (Required for activity (By similarity).);MOD_RES (N6-acetyllysine; alternate.);MOD_RES (N6-succinyllysine; alternate (By similarity).);MOD_RES (N6-acetyllysine; alternate (By similarity).);MOD_RES (N6-acetyllysine.);MOD_RES (N6-acetyllysine (By similarity).)				201
P25705	LTELLKQGQYSPM	YES	ATP synthase subunit alpha, mitochondrial	ATP5A1;ATP synthase subunit alpha, mitochondrial;ATPA;	(Human)	18	TQQLLSRGVR	LTELLKQGQY	467	553							NP_BIND (ATP (By similarity).);SITE (Required for activity (By similarity).);MOD_RES (Pyrrolidone carboxylic acid (By similarity).);MOD_RES (Phosphoserine (By similarity).);MOD_RES (N6-acetyllysine (By similarity).);MOD_RES (N6-acetyllysine; alternate.);MOD_RES (N6-succinyllysine; alternate (By similarity).);MOD_RES (Phosphoserine.);MOD_RES (N6-acetyllysine; alternate (By similarity).);MOD_RES (N…	CHAIN (ATP synthase subunit alpha, mitochondrial.)	MOD_RES (N6-acetyllysine; alternate.);MOD_RES (N6-succinyllysine; alternate (By similarity).);MOD_RES (N6-acetyllysine; alternate (By similarity).);MOD_RES (N6-acetyllysine (By similarity).)				423
P25705	NVQAEEMVEFSSGLKGM	YES	ATP synthase subunit alpha, mitochondrial	ATP5A1;ATP synthase subunit alpha, mitochondrial;ATPA;	(Human)	18	DGIARVHGLR	NVQAEEMVEF	89	553							MOD_RES (Pyrrolidone carboxylic acid (By similarity).);MOD_RES (Phosphoserine (By similarity).);TRANSIT (Mitochondrion.)	CHAIN (ATP synthase subunit alpha, mitochondrial.)	NP_BIND (ATP (By similarity).);SITE (Required for activity (By similarity).);MOD_RES (N6-acetyllysine (By similarity).);MOD_RES (N6-acetyllysine; alternate.);MOD_RES (N6-succinyllysine; alternate (By similarity).);MOD_RES (Phosphoserine.);MOD_RES (N6-acetyllysine; alternate (By similarity).);MOD_RES (N6-acetyllysine.)				45
P25705	QKTGTAEMSSILEER	YES	ATP synthase subunit alpha, mitochondrial	ATP5A1;ATP synthase subunit alpha, mitochondrial;ATPA;	(Human)	18	RNFHASNTHL	QKTGTAEMSS	44	553	X	X			Subtiligase Based Positive Selection;unknown		TRANSIT (Mitochondrion.)		NP_BIND (ATP (By similarity).);SITE (Required for activity (By similarity).);MOD_RES (Pyrrolidone carboxylic acid (By similarity).);MOD_RES (Phosphoserine (By similarity).);MOD_RES (N6-acetyllysine (By similarity).);MOD_RES (N6-acetyllysine; alternate.);MOD_RES (N6-succinyllysine; alternate (By similarity).);MOD_RES (Phosphoserine.);MOD_RES (N6-acetyllysine; alternate (By similarity).);MOD_RES (N…				0
P25705	QMSLLLR	YES	ATP synthase subunit alpha, mitochondrial	ATP5A1;ATP synthase subunit alpha, mitochondrial;ATPA;	(Human)	18	DLSKQAVAYR	QMSLLLRRPP	323	553							NP_BIND (ATP (By similarity).);MOD_RES (Pyrrolidone carboxylic acid (By similarity).);MOD_RES (Phosphoserine (By similarity).);MOD_RES (N6-acetyllysine (By similarity).);MOD_RES (N6-acetyllysine; alternate.);MOD_RES (N6-succinyllysine; alternate (By similarity).);MOD_RES (Phosphoserine.);MOD_RES (N6-acetyllysine; alternate (By similarity).);TRANSIT (Mitochondrion.)	CHAIN (ATP synthase subunit alpha, mitochondrial.)	SITE (Required for activity (By similarity).);MOD_RES (N6-acetyllysine; alternate (By similarity).);MOD_RES (N6-succinyllysine; alternate (By similarity).);MOD_RES (N6-acetyllysine.);MOD_RES (N6-acetyllysine; alternate.);MOD_RES (N6-acetyllysine (By similarity).)				279
P25705	QTGKTSIAIDTIINQKR	YES	ATP synthase subunit alpha, mitochondrial	ATP5A1;ATP synthase subunit alpha, mitochondrial;ATPA;	(Human)	18	GQRELIIGDR	QTGKTSIAID	215	553							MOD_RES (Pyrrolidone carboxylic acid (By similarity).);MOD_RES (Phosphoserine (By similarity).);MOD_RES (N6-acetyllysine (By similarity).);MOD_RES (N6-acetyllysine; alternate.);MOD_RES (N6-succinyllysine; alternate (By similarity).);MOD_RES (Phosphoserine.);MOD_RES (N6-acetyllysine; alternate (By similarity).);TRANSIT (Mitochondrion.)	NP_BIND (ATP (By similarity).);CHAIN (ATP synthase subunit alpha, mitochondrial.)	SITE (Required for activity (By similarity).);MOD_RES (N6-acetyllysine; alternate (By similarity).);MOD_RES (N6-succinyllysine; alternate (By similarity).);MOD_RES (N6-acetyllysine (By similarity).);MOD_RES (N6-acetyllysine; alternate.);MOD_RES (N6-acetyllysine.)				171
P25705	STVAQLVKR	YES	ATP synthase subunit alpha, mitochondrial	ATP5A1;ATP synthase subunit alpha, mitochondrial;ATPA;	(Human)	18	CIYVAIGQKR	STVAQLVKRL	254	553							NP_BIND (ATP (By similarity).);MOD_RES (Pyrrolidone carboxylic acid (By similarity).);MOD_RES (Phosphoserine (By similarity).);MOD_RES (N6-acetyllysine (By similarity).);MOD_RES (N6-acetyllysine; alternate.);MOD_RES (N6-succinyllysine; alternate (By similarity).);MOD_RES (Phosphoserine.);MOD_RES (N6-acetyllysine; alternate (By similarity).);TRANSIT (Mitochondrion.)	CHAIN (ATP synthase subunit alpha, mitochondrial.)	SITE (Required for activity (By similarity).);MOD_RES (N6-acetyllysine; alternate.);MOD_RES (N6-succinyllysine; alternate (By similarity).);MOD_RES (N6-acetyllysine; alternate (By similarity).);MOD_RES (N6-acetyllysine.);MOD_RES (N6-acetyllysine (By similarity).)				210
P25705	TGAIVDVPVGEELLGR	YES	ATP synthase subunit alpha, mitochondrial	ATP5A1;ATP synthase subunit alpha, mitochondrial;ATPA;	(Human)	18	LIKEGDIVKR	TGAIVDVPVG	134	553							MOD_RES (Pyrrolidone carboxylic acid (By similarity).);MOD_RES (Phosphoserine (By similarity).);MOD_RES (N6-acetyllysine (By similarity).);TRANSIT (Mitochondrion.)	CHAIN (ATP synthase subunit alpha, mitochondrial.)	NP_BIND (ATP (By similarity).);SITE (Required for activity (By similarity).);MOD_RES (N6-acetyllysine; alternate.);MOD_RES (N6-succinyllysine; alternate (By similarity).);MOD_RES (Phosphoserine.);MOD_RES (N6-acetyllysine; alternate (By similarity).);MOD_RES (N6-acetyllysine (By similarity).);MOD_RES (N6-acetyllysine.)				90
P25705	TGIKAVDSLVPIGR	YES	ATP synthase subunit alpha, mitochondrial	ATP5A1;ATP synthase subunit alpha, mitochondrial;ATPA;	(Human)	18	PRISVREPMQ	TGIKAVDSLV	191	553							MOD_RES (Pyrrolidone carboxylic acid (By similarity).);MOD_RES (Phosphoserine (By similarity).);MOD_RES (N6-acetyllysine (By similarity).);MOD_RES (N6-acetyllysine; alternate.);MOD_RES (N6-succinyllysine; alternate (By similarity).);MOD_RES (Phosphoserine.);MOD_RES (N6-acetyllysine; alternate (By similarity).);TRANSIT (Mitochondrion.)	CHAIN (ATP synthase subunit alpha, mitochondrial.)	NP_BIND (ATP (By similarity).);SITE (Required for activity (By similarity).);MOD_RES (N6-acetyllysine; alternate (By similarity).);MOD_RES (N6-succinyllysine; alternate (By similarity).);MOD_RES (N6-acetyllysine (By similarity).);MOD_RES (N6-acetyllysine; alternate.);MOD_RES (N6-acetyllysine.)				147
P25705	TGTAEMSSILEER	YES	ATP synthase subunit alpha, mitochondrial	ATP5A1;ATP synthase subunit alpha, mitochondrial;ATPA;	(Human)	18	FHASNTHLQK	TGTAEMSSIL	46	553	X	X			Subtiligase Based Positive Selection;unknown		MOD_RES (Pyrrolidone carboxylic acid (By similarity).);TRANSIT (Mitochondrion.)	CHAIN (ATP synthase subunit alpha, mitochondrial.)	NP_BIND (ATP (By similarity).);SITE (Required for activity (By similarity).);MOD_RES (Phosphoserine (By similarity).);MOD_RES (N6-acetyllysine (By similarity).);MOD_RES (N6-acetyllysine; alternate.);MOD_RES (N6-succinyllysine; alternate (By similarity).);MOD_RES (Phosphoserine.);MOD_RES (N6-acetyllysine; alternate (By similarity).);MOD_RES (N6-acetyllysine.)				2
P25705	TSVDLEETGR	YES	ATP synthase subunit alpha, mitochondrial	ATP5A1;ATP synthase subunit alpha, mitochondrial;ATPA;	(Human)	18	ILEERILGAD	TSVDLEETGR	64	553				GRAB	Subtiligase Based Positive Selection		MOD_RES (Pyrrolidone carboxylic acid (By similarity).);TRANSIT (Mitochondrion.)	CHAIN (ATP synthase subunit alpha, mitochondrial.)	NP_BIND (ATP (By similarity).);SITE (Required for activity (By similarity).);MOD_RES (Phosphoserine (By similarity).);MOD_RES (N6-acetyllysine (By similarity).);MOD_RES (N6-acetyllysine; alternate.);MOD_RES (N6-succinyllysine; alternate (By similarity).);MOD_RES (Phosphoserine.);MOD_RES (N6-acetyllysine; alternate (By similarity).);MOD_RES (N6-acetyllysine.)				20
P25705	VGLKAPGIIPR	YES	ATP synthase subunit alpha, mitochondrial	ATP5A1;ATP synthase subunit alpha, mitochondrial;ATPA;	(Human)	18	GPIGSKTRRR	VGLKAPGIIP	172	553							MOD_RES (Pyrrolidone carboxylic acid (By similarity).);MOD_RES (Phosphoserine (By similarity).);MOD_RES (N6-acetyllysine (By similarity).);MOD_RES (N6-acetyllysine; alternate.);MOD_RES (N6-succinyllysine; alternate (By similarity).);MOD_RES (Phosphoserine.);MOD_RES (N6-acetyllysine; alternate (By similarity).);TRANSIT (Mitochondrion.)	CHAIN (ATP synthase subunit alpha, mitochondrial.)	NP_BIND (ATP (By similarity).);SITE (Required for activity (By similarity).);MOD_RES (N6-acetyllysine; alternate (By similarity).);MOD_RES (N6-succinyllysine; alternate (By similarity).);MOD_RES (N6-acetyllysine (By similarity).);MOD_RES (N6-acetyllysine; alternate.);MOD_RES (N6-acetyllysine.)				128
P25705	VLSIGDGIAR	YES	ATP synthase subunit alpha, mitochondrial	ATP5A1;ATP synthase subunit alpha, mitochondrial;ATPA;	(Human)	18	TSVDLEETGR	VLSIGDGIAR	74	553							MOD_RES (Pyrrolidone carboxylic acid (By similarity).);TRANSIT (Mitochondrion.)	CHAIN (ATP synthase subunit alpha, mitochondrial.)	NP_BIND (ATP (By similarity).);SITE (Required for activity (By similarity).);MOD_RES (Phosphoserine (By similarity).);MOD_RES (N6-acetyllysine (By similarity).);MOD_RES (N6-acetyllysine; alternate.);MOD_RES (N6-succinyllysine; alternate (By similarity).);MOD_RES (Phosphoserine.);MOD_RES (N6-acetyllysine; alternate (By similarity).);MOD_RES (N6-acetyllysine.)				30
P25705	VVDALGNAIDGKGPIGSKTR	YES	ATP synthase subunit alpha, mitochondrial	ATP5A1;ATP synthase subunit alpha, mitochondrial;ATPA;	(Human)	18	VPVGEELLGR	VVDALGNAID	150	553							MOD_RES (Pyrrolidone carboxylic acid (By similarity).);MOD_RES (Phosphoserine (By similarity).);MOD_RES (N6-acetyllysine (By similarity).);TRANSIT (Mitochondrion.)	CHAIN (ATP synthase subunit alpha, mitochondrial.)	NP_BIND (ATP (By similarity).);SITE (Required for activity (By similarity).);MOD_RES (N6-acetyllysine; alternate.);MOD_RES (N6-succinyllysine; alternate (By similarity).);MOD_RES (Phosphoserine.);MOD_RES (N6-acetyllysine; alternate (By similarity).);MOD_RES (N6-acetyllysine (By similarity).);MOD_RES (N6-acetyllysine.)				106
P26440	HSLLPVDDAINGLSEEQR	YES	Isovaleryl-CoA dehydrogenase, mitochondrial	IVD;Isovaleryl-CoA dehydrogenase, mitochondrial;IVD;	(Human)	15	PLAGFVSQRA	HSLLPVDDAI	30	423	X	X			Subtiligase Based Positive Selection		TRANSIT (Mitochondrion.)		CHAIN (Isovaleryl-CoA dehydrogenase, mitochondrial.);MOD_RES (N6-acetyllysine; alternate (By similarity).);MOD_RES (N6-succinyllysine; alternate (By similarity).);MOD_RES (N6-acetyllysine; alternate.);MOD_RES (N6-acetyllysine (By similarity).);MOD_RES (N6-succinyllysine (By similarity).);REGION (Substrate binding.);NP_BIND (FAD.);BINDING (Substrate; via carbonyl oxygen.);BINDING (Substrate.);BIND…				0
P30048	DYGVLLEGSGLALR	YES	Thioredoxin-dependent peroxide reductase, mitochondrial	PRDX3;Thioredoxin-dependent peroxide reductase, mitochondrial;Antioxidant protein 1 Short=AOP-1 ;HBC189 ;Peroxiredoxin III Short=Prx-III ;Peroxiredoxin-3 ;Protein MER5 homolog;PRDX3;	(Human)	10	LSDLTKQISR	DYGVLLEGSG	171	256							MOD_RES (N6-succinyllysine (By similarity).);MOD_RES (N6-acetyllysine; alternate.);MOD_RES (N6-succinyllysine; alternate (By similarity).);MOD_RES (Phosphothreonine (Probable).);ACT_SITE (Cysteine sulfenic acid (-SOH) intermediate (By similarity).);DISULFID (Interchain (with C-229); in linked form (By similarity).);TRANSIT (Mitochondrion.);MUTAGEN (T->A: Impairs phosphorylation.)	DOMAIN (Thioredoxin.);CHAIN (Thioredoxin-dependent peroxide reductase, mitochondrial.)	DISULFID (Interchain (with C-108); in linked form (By similarity).)				108
P30084	ASGANFEYIIAEKR	YES	Enoyl-CoA hydratase, mitochondrial	ECHS1;Enoyl-CoA hydratase, mitochondrial;Enoyl-CoA hydratase 1 ;Short-chain enoyl-CoA hydratase Short=SCEH;ECHM;	(Human)	10	PVRCPAWRPF	ASGANFEYII	28	290	X	X			Subtiligase Based Positive Selection;unknown		TRANSIT (Mitochondrion.)		CHAIN (Enoyl-CoA hydratase, mitochondrial.);MOD_RES (N6-acetyllysine; alternate (By similarity).);MOD_RES (N6-succinyllysine; alternate (By similarity).);MOD_RES (N6-acetyllysine.);MOD_RES (N6-succinyllysine (By similarity).);MOD_RES (N6-acetyllysine (By similarity).);REGION (Substrate binding.);BINDING (Substrate; via amide nitrogen.);SITE (Important for catalytic activity (By similarity).)				0
P30084	AVGKSLAMEMVLTGDR	YES	Enoyl-CoA hydratase, mitochondrial	ECHS1;Enoyl-CoA hydratase, mitochondrial;Enoyl-CoA hydratase 1 ;Short-chain enoyl-CoA hydratase Short=SCEH;ECHM;	(Human)	10	GAGGTQRLTR	AVGKSLAMEM	182	290							MOD_RES (N6-acetyllysine; alternate (By similarity).);MOD_RES (N6-succinyllysine; alternate (By similarity).);MOD_RES (N6-acetyllysine.);REGION (Substrate binding.);TRANSIT (Mitochondrion.);BINDING (Substrate; via amide nitrogen.);SITE (Important for catalytic activity (By similarity).)	CHAIN (Enoyl-CoA hydratase, mitochondrial.)	MOD_RES (N6-succinyllysine (By similarity).);MOD_RES (N6-acetyllysine (By similarity).)				154
P30084	FASGANFEYIIAEKR	YES	Enoyl-CoA hydratase, mitochondrial	ECHS1;Enoyl-CoA hydratase, mitochondrial;Enoyl-CoA hydratase 1 ;Short-chain enoyl-CoA hydratase Short=SCEH;ECHM;	(Human)	10	PPVRCPAWRP	FASGANFEYI	27	290	X	X			Subtiligase Based Positive Selection;unknown			TRANSIT (Mitochondrion.)	CHAIN (Enoyl-CoA hydratase, mitochondrial.);MOD_RES (N6-acetyllysine; alternate (By similarity).);MOD_RES (N6-succinyllysine; alternate (By similarity).);MOD_RES (N6-acetyllysine.);MOD_RES (N6-succinyllysine (By similarity).);MOD_RES (N6-acetyllysine (By similarity).);REGION (Substrate binding.);BINDING (Substrate; via amide nitrogen.);SITE (Important for catalytic activity (By similarity).)				-1
P30084	KEGMTAFVEKR	YES	Enoyl-CoA hydratase, mitochondrial	ECHS1;Enoyl-CoA hydratase, mitochondrial;Enoyl-CoA hydratase 1 ;Short-chain enoyl-CoA hydratase Short=SCEH;ECHM;	(Human)	10	FYSTFATDDR	KEGMTAFVEK	273	290							MOD_RES (N6-acetyllysine; alternate (By similarity).);MOD_RES (N6-succinyllysine; alternate (By similarity).);MOD_RES (N6-acetyllysine.);MOD_RES (N6-succinyllysine (By similarity).);MOD_RES (N6-acetyllysine (By similarity).);REGION (Substrate binding.);TRANSIT (Mitochondrion.);BINDING (Substrate; via amide nitrogen.);SITE (Important for catalytic activity (By similarity).)	CHAIN (Enoyl-CoA hydratase, mitochondrial.)					245
P30084	SGANFEYIIAEKR	YES	Enoyl-CoA hydratase, mitochondrial	ECHS1;Enoyl-CoA hydratase, mitochondrial;Enoyl-CoA hydratase 1 ;Short-chain enoyl-CoA hydratase Short=SCEH;ECHM;	(Human)	10	VRCPAWRPFA	SGANFEYIIA	29	290	X	X			Subtiligase Based Positive Selection;unknown		TRANSIT (Mitochondrion.)	CHAIN (Enoyl-CoA hydratase, mitochondrial.)	MOD_RES (N6-acetyllysine; alternate (By similarity).);MOD_RES (N6-succinyllysine; alternate (By similarity).);MOD_RES (N6-acetyllysine.);MOD_RES (N6-succinyllysine (By similarity).);MOD_RES (N6-acetyllysine (By similarity).);REGION (Substrate binding.);BINDING (Substrate; via amide nitrogen.);SITE (Important for catalytic activity (By similarity).)				1
P31040	GEGGILINSQGER	YES	Succinate dehydrogenase [ubiquinone] flavoprotein subunit, mitochondrial	SDHA;Succinate dehydrogenase [ubiquinone] flavoprotein subunit, mitochondrial;Flavoprotein subunit of complex II Short=Fp;SDHA;	(Human)	5	AGCLITEGCR	GEGGILINSQ	313	664							MOD_RES (Tele-8alpha-FAD histidine (By similarity).);MOD_RES (N6-acetyllysine (By similarity).);MOD_RES (N6-acetyllysine; alternate.);MOD_RES (N6-succinyllysine; alternate (By similarity).);MOD_RES (Phosphotyrosine; by SRC.);MOD_RES (N6-acetyllysine; alternate (By similarity).);NP_BIND (FAD (By similarity).);TRANSIT (Mitochondrion (By similarity).);BINDING (FAD (By similarity).);BINDING (Substrat…	CHAIN (Succinate dehydrogenase [ubiquinone] flavoprotein subunit, mitochondrial.)	MOD_RES (N6-acetyllysine; alternate.);MOD_RES (N6-succinyllysine; alternate (By similarity).);MOD_RES (N6-acetyllysine (By similarity).);MOD_RES (N6-acetyllysine; alternate (By similarity).);MOD_RES (N6-acetyllysine.);MOD_RES (N6-succinyllysine (By similarity).);ACT_SITE (Proton acceptor (By similarity).);NP_BIND (FAD (By similarity).);BINDING (Substrate (By similarity).);BINDING (FAD (By similar…				269
P32322	EGATVYATGTHAQVEDGR	YES	Pyrroline-5-carboxylate reductase 1, mitochondrial	PYCR1;Pyrroline-5-carboxylate reductase 1, mitochondrial;P5CR1;	(Human)	17	CMTNTPVVVR	EGATVYATGT	130	319							MOD_RES (N-acetylserine.);INIT_MET (Removed.);NP_BIND (NADP.);BINDING (NADP; via carbonyl oxygen.);BINDING (NADP.)	CHAIN (Pyrroline-5-carboxylate reductase 1, mitochondrial.)	MUTAGEN (E->A: Reduced enzyme activity.)
P32322	SLLINAVEASCIR	YES	Pyrroline-5-carboxylate reductase 1, mitochondrial	PYCR1;Pyrroline-5-carboxylate reductase 1, mitochondrial;P5CR1;	(Human)	17	LHVLESGGFR	SLLINAVEAS	252	319							MOD_RES (N-acetylserine.);INIT_MET (Removed.);NP_BIND (NADP.);MUTAGEN (E->A: Reduced enzyme activity.);BINDING (NADP; via carbonyl oxygen.);BINDING (NADP.)	CHAIN (Pyrroline-5-carboxylate reductase 1, mitochondrial.)
P34897	AFPMPGFDEH	YES	Serine hydroxymethyltransferase, mitochondrial	SHMT2;Serine hydroxymethyltransferase, mitochondrial;Glycine hydroxymethyltransferase ;Serine methylase;GLYM;	(Human)	12	LRQRVEQFAR	AFPMPGFDEH	495	504							MOD_RES (N6-acetyllysine.);MOD_RES (N6-(pyridoxal phosphate)lysine (By similarity).);TRANSIT (Mitochondrion.)	CHAIN (Serine hydroxymethyltransferase, mitochondrial.)					465
P34897	AMADALLER	YES	Serine hydroxymethyltransferase, mitochondrial	SHMT2;Serine hydroxymethyltransferase, mitochondrial;Glycine hydroxymethyltransferase ;Serine methylase;GLYM;	(Human)	12	YSLQVLKNAR	AMADALLERG	360	504							MOD_RES (N6-acetyllysine.);MOD_RES (N6-(pyridoxal phosphate)lysine (By similarity).);TRANSIT (Mitochondrion.)	CHAIN (Serine hydroxymethyltransferase, mitochondrial.)	MOD_RES (N6-acetyllysine.)				330
P34897	EIPYTFEDR	YES	Serine hydroxymethyltransferase, mitochondrial	SHMT2;Serine hydroxymethyltransferase, mitochondrial;Glycine hydroxymethyltransferase ;Serine methylase;GLYM;	(Human)	12	VKAVDPKTGR	EIPYTFEDRI	306	504							MOD_RES (N6-acetyllysine.);MOD_RES (N6-(pyridoxal phosphate)lysine (By similarity).);TRANSIT (Mitochondrion.)	CHAIN (Serine hydroxymethyltransferase, mitochondrial.)	MOD_RES (N6-acetyllysine.)				276
P34897	EVCDEVKAH	YES	Serine hydroxymethyltransferase, mitochondrial	SHMT2;Serine hydroxymethyltransferase, mitochondrial;Glycine hydroxymethyltransferase ;Serine methylase;GLYM;	(Human)	12	ARLIDYARMR	EVCDEVKAHL	239	504							MOD_RES (N6-acetyllysine.);TRANSIT (Mitochondrion.)	CHAIN (Serine hydroxymethyltransferase, mitochondrial.)	MOD_RES (N6-(pyridoxal phosphate)lysine (By similarity).);MOD_RES (N6-acetyllysine.)				209
P34897	LANLR	YES	Serine hydroxymethyltransferase, mitochondrial	SHMT2;Serine hydroxymethyltransferase, mitochondrial;Glycine hydroxymethyltransferase ;Serine methylase;GLYM;	(Human)	12	LLKDSETSQR	LANLRQRVEQ	482	504							MOD_RES (N6-acetyllysine.);MOD_RES (N6-(pyridoxal phosphate)lysine (By similarity).);TRANSIT (Mitochondrion.)	CHAIN (Serine hydroxymethyltransferase, mitochondrial.)					452
P34897	LGAPALTSR	YES	Serine hydroxymethyltransferase, mitochondrial	SHMT2;Serine hydroxymethyltransferase, mitochondrial;Glycine hydroxymethyltransferase ;Serine methylase;GLYM;	(Human)	12	RSAITPGGLR	LGAPALTSRQ	426	504							MOD_RES (N6-acetyllysine.);MOD_RES (N6-(pyridoxal phosphate)lysine (By similarity).);TRANSIT (Mitochondrion.)	CHAIN (Serine hydroxymethyltransferase, mitochondrial.)	MOD_RES (N6-acetyllysine.)				396
P34897	LIIAGTSAYAR	YES	Serine hydroxymethyltransferase, mitochondrial	SHMT2;Serine hydroxymethyltransferase, mitochondrial;Glycine hydroxymethyltransferase ;Serine methylase;GLYM;	(Human)	12	ALTARLFRPR	LIIAGTSAYA	220	504							MOD_RES (N6-acetyllysine.);TRANSIT (Mitochondrion.)	CHAIN (Serine hydroxymethyltransferase, mitochondrial.)	MOD_RES (N6-(pyridoxal phosphate)lysine (By similarity).);MOD_RES (N6-acetyllysine.)				190
P34897	QHSNAAQTQTGEANR	YES	Serine hydroxymethyltransferase, mitochondrial	SHMT2;Serine hydroxymethyltransferase, mitochondrial;Glycine hydroxymethyltransferase ;Serine methylase;GLYM;	(Human)	12	GQLVRMAIRA	QHSNAAQTQT	27	504	X	X			unknown;Subtiligase Based Positive Selection			TRANSIT (Mitochondrion.)	CHAIN (Serine hydroxymethyltransferase, mitochondrial.);MOD_RES (N6-acetyllysine.);MOD_RES (N6-(pyridoxal phosphate)lysine (By similarity).)				-3
P35232	IFTSIGEDYDER	YES	Prohibitin	PHB;Prohibitin;PHB;	(Human)	17	FRPVASQLPR	IFTSIGEDYD	106	272								CHAIN (Prohibitin.)	MOD_RES (N6-acetyllysine (By similarity).);MOD_RES (N6-acetyllysine; alternate.);MOD_RES (N6-succinyllysine; alternate (By similarity).);MOD_RES (Phosphotyrosine (By similarity).);COILED (Potential.)
P35232	KLEAAEDIAYQLSR	YES	Prohibitin	PHB;Prohibitin;PHB;	(Human)	17	TAGDGLIELR	KLEAAEDIAY	240	272							MOD_RES (N6-acetyllysine (By similarity).);MOD_RES (N6-acetyllysine; alternate.);MOD_RES (N6-succinyllysine; alternate (By similarity).);COILED (Potential.)	CHAIN (Prohibitin.)	MOD_RES (Phosphotyrosine (By similarity).)
P35232	QVSDDLTER	YES	Prohibitin	PHB;Prohibitin;PHB;	(Human)	17	LITQRELVSR	QVSDDLTERA	149	272							MOD_RES (N6-acetyllysine (By similarity).)	CHAIN (Prohibitin.)	MOD_RES (N6-acetyllysine (By similarity).);MOD_RES (N6-acetyllysine; alternate.);MOD_RES (N6-succinyllysine; alternate (By similarity).);MOD_RES (Phosphotyrosine (By similarity).);COILED (Potential.)
P35914	VSTSSMGTLPKR	YES	Hydroxymethylglutaryl-CoA lyase, mitochondrial	HMGCL;Hydroxymethylglutaryl-CoA lyase, mitochondrial;3-hydroxy-3-methylglutarate-CoA lyase;HMGCL;	(Human)	1	RLVGLASLRA	VSTSSMGTLP	21	325					Subtiligase Based Positive Selection;unknown			TRANSIT (Mitochondrion.)	DISULFID (Interchain.);CHAIN (Hydroxymethylglutaryl-CoA lyase, mitochondrial.);METAL (Divalent metal cation.);MOTIF (Microbody targeting signal (Potential).);MOD_RES (N6-acetyllysine; alternate.);MOD_RES (N6-succinyllysine; alternate (By similarity).);MOD_RES (N6-acetyllysine (By similarity).);MOD_RES (N6-acetyllysine; alternate (By similarity).);BINDING (Substrate.);ACT_SITE (By similarity.);MUT…				-7
P36542	ATLKDITR	YES	ATP synthase subunit gamma, mitochondrial	ATP5C1;ATP synthase subunit gamma, mitochondrial;F-ATPase gamma subunit;ATPG;	(Human)	10	QPQWIQVRNM	ATLKDITRRL	26	298	X	X		MPPB			TRANSIT (Mitochondrion.)		MOD_RES (N6-acetyllysine (By similarity).);MOD_RES (N6-succinyllysine (By similarity).);MOD_RES (N6-acetyllysine.);MOD_RES (N6-acetyllysine; alternate (By similarity).);MOD_RES (N6-succinyllysine; alternate (By similarity).);MOD_RES (N6-acetyllysine; alternate.);CHAIN (ATP synthase subunit gamma, mitochondrial.)				0
P36542	MATLKDITR	YES	ATP synthase subunit gamma, mitochondrial	ATP5C1;ATP synthase subunit gamma, mitochondrial;F-ATPase gamma subunit;ATPG;	(Human)	10	LQPQWIQVRN	MATLKDITRR	25	298	X	X		MPPB				TRANSIT (Mitochondrion.)	MOD_RES (N6-acetyllysine (By similarity).);MOD_RES (N6-succinyllysine (By similarity).);MOD_RES (N6-acetyllysine.);MOD_RES (N6-acetyllysine; alternate (By similarity).);MOD_RES (N6-succinyllysine; alternate (By similarity).);MOD_RES (N6-acetyllysine; alternate.);CHAIN (ATP synthase subunit gamma, mitochondrial.)				-1
P36542	SLKESTTSEQSAR	YES	ATP synthase subunit gamma, mitochondrial	ATP5C1;ATP synthase subunit gamma, mitochondrial;F-ATPase gamma subunit;ATPG;	(Human)	10	EYNLANIIYY	SLKESTTSEQ	241	298							MOD_RES (N6-acetyllysine (By similarity).);MOD_RES (N6-succinyllysine (By similarity).);MOD_RES (N6-acetyllysine.);MOD_RES (N6-acetyllysine; alternate (By similarity).);MOD_RES (N6-succinyllysine; alternate (By similarity).);MOD_RES (N6-acetyllysine; alternate.);TRANSIT (Mitochondrion.)	CHAIN (ATP synthase subunit gamma, mitochondrial.)	MOD_RES (N6-succinyllysine (By similarity).)				215
P36551	ATAAFGHVQR	YES	Oxygen-dependent coproporphyrinogen-III oxidase, mitochondrial	CPOX;Oxygen-dependent coproporphyrinogen-III oxidase, mitochondrial;HEM6;	(Human)	3	AAALAGLVGL	ATAAFGHVQR	89	454					Subtiligase Based Positive Selection;unknown			TRANSIT (Mitochondrion (By similarity).)	CHAIN (Oxygen-dependent coproporphyrinogen-III oxidase, mitochondrial.);MOD_RES (N6-acetyllysine; alternate (By similarity).);MOD_RES (N6-succinyllysine; alternate (By similarity).);REGION (Important for dimerization (Probable).);REGION (Substrate binding.);REGION (Important for dimerization.);BINDING (Substrate (Probable).);ACT_SITE (Proton donor.);MUTAGEN (Missing: Loss for dimerization.);SITE …				-22
P36551	TSLGRPEEEEDELAHR	YES	Oxygen-dependent coproporphyrinogen-III oxidase, mitochondrial	CPOX;Oxygen-dependent coproporphyrinogen-III oxidase, mitochondrial;HEM6;	(Human)	3	MLPKTSGTRA	TSLGRPEEEE	111	454	X	X			Subtiligase Based Positive Selection		TRANSIT (Mitochondrion (By similarity).)		CHAIN (Oxygen-dependent coproporphyrinogen-III oxidase, mitochondrial.);MOD_RES (N6-acetyllysine; alternate (By similarity).);MOD_RES (N6-succinyllysine; alternate (By similarity).);REGION (Important for dimerization (Probable).);REGION (Substrate binding.);REGION (Important for dimerization.);BINDING (Substrate (Probable).);ACT_SITE (Proton donor.);MUTAGEN (Missing: Loss for dimerization.);SITE …				0
P36776	DIIALNPLYR	YES	Lon protease homolog, mitochondrial	LONP1;Lon protease homolog, mitochondrial;LONHs ;Lon protease-like protein Short=LONP ;Mitochondrial ATP-dependent protease Lon ;Serine protease 15;LONM;S16.002	(Human)	19	LTAEIVKTIR	DIIALNPLYR	302	959							TRANSIT (Mitochondrion (By similarity).)	CHAIN (Lon protease homolog, mitochondrial.);DOMAIN (Lon.)	NP_BIND (ATP (By similarity).);ACT_SITE (By similarity.);MUTAGEN (S->A: Lacks both ATPase and protease activity, but retains DNA binding activity.)				234
P36776	EVEEKIKQTHR	YES	Lon protease homolog, mitochondrial	LONP1;Lon protease homolog, mitochondrial;LONHs ;Lon protease-like protein Short=LONP ;Mitochondrial ATP-dependent protease Lon ;Serine protease 15;LONM;S16.002	(Human)	19	LSKLQQRLGR	EVEEKIKQTH	382	959							TRANSIT (Mitochondrion (By similarity).);DOMAIN (Lon.)	CHAIN (Lon protease homolog, mitochondrial.)	NP_BIND (ATP (By similarity).);ACT_SITE (By similarity.);MUTAGEN (S->A: Lacks both ATPase and protease activity, but retains DNA binding activity.)				314
P36776	GKKEAEDELSAR	YES	Lon protease homolog, mitochondrial	LONP1;Lon protease homolog, mitochondrial;LONHs ;Lon protease-like protein Short=LONP ;Mitochondrial ATP-dependent protease Lon ;Serine protease 15;LONM;S16.002	(Human)	19	KHKPRRKSKR	GKKEAEDELS	242	959							TRANSIT (Mitochondrion (By similarity).)	CHAIN (Lon protease homolog, mitochondrial.);DOMAIN (Lon.)	NP_BIND (ATP (By similarity).);ACT_SITE (By similarity.);MUTAGEN (S->A: Lacks both ATPase and protease activity, but retains DNA binding activity.)				174
P36957	DDLVTVKTPAFAESVTEGDVR	YES	Dihydrolipoyllysine-residue succinyltransferase component of 2-oxoglutarate dehydrogenase complex, mitochondrial	DLST;Dihydrolipoyllysine-residue succinyltransferase component of 2-oxoglutarate dehydrogenase complex, mitochondrial;2-oxoglutarate dehydrogenase complex component E2 Short=OGDC-E2 ;Dihydrolipoamide succinyltransferase component of 2-oxoglutarate dehydrogenase complex ;E2K;ODO2;	(Human)	14	RFFRTTAVCK	DDLVTVKTPA	68	453	X	X					TRANSIT (Mitochondrion.)		CHAIN (Dihydrolipoyllysine-residue succinyltransferase component of 2- oxoglutarate dehydrogenase complex, mitochondrial.);MOD_RES (N6-lipoyllysine (Potential).);MOD_RES (N6-acetyllysine (By similarity).);ACT_SITE (Potential.);DOMAIN (Lipoyl-binding.)				0
P36957	EAVTFLR	YES	Dihydrolipoyllysine-residue succinyltransferase component of 2-oxoglutarate dehydrogenase complex, mitochondrial	DLST;Dihydrolipoyllysine-residue succinyltransferase component of 2-oxoglutarate dehydrogenase complex, mitochondrial;2-oxoglutarate dehydrogenase complex component E2 Short=OGDC-E2 ;Dihydrolipoamide succinyltransferase component of 2-oxoglutarate dehydrogenase complex ;E2K;ODO2;	(Human)	14	TYDHRLIDGR	EAVTFLRKIK	431	453							MOD_RES (N6-lipoyllysine (Potential).);MOD_RES (N6-acetyllysine (By similarity).);TRANSIT (Mitochondrion.);ACT_SITE (Potential.);DOMAIN (Lipoyl-binding.)	CHAIN (Dihydrolipoyllysine-residue succinyltransferase component of 2- oxoglutarate dehydrogenase complex, mitochondrial.)					363
P36957	GLVVPVIR	YES	Dihydrolipoyllysine-residue succinyltransferase component of 2-oxoglutarate dehydrogenase complex, mitochondrial	DLST;Dihydrolipoyllysine-residue succinyltransferase component of 2-oxoglutarate dehydrogenase complex, mitochondrial;2-oxoglutarate dehydrogenase complex component E2 Short=OGDC-E2 ;Dihydrolipoamide succinyltransferase component of 2-oxoglutarate dehydrogenase complex ;E2K;ODO2;	(Human)	14	DISVAVATPR	GLVVPVIRNV	326	453							MOD_RES (N6-lipoyllysine (Potential).);MOD_RES (N6-acetyllysine (By similarity).);TRANSIT (Mitochondrion.);DOMAIN (Lipoyl-binding.)	CHAIN (Dihydrolipoyllysine-residue succinyltransferase component of 2- oxoglutarate dehydrogenase complex, mitochondrial.)	ACT_SITE (Potential.)				258
P36957	NVEAMNFADIER	YES	Dihydrolipoyllysine-residue succinyltransferase component of 2-oxoglutarate dehydrogenase complex, mitochondrial	DLST;Dihydrolipoyllysine-residue succinyltransferase component of 2-oxoglutarate dehydrogenase complex, mitochondrial;2-oxoglutarate dehydrogenase complex component E2 Short=OGDC-E2 ;Dihydrolipoamide succinyltransferase component of 2-oxoglutarate dehydrogenase complex ;E2K;ODO2;	(Human)	14	PRGLVVPVIR	NVEAMNFADI	334	453							MOD_RES (N6-lipoyllysine (Potential).);MOD_RES (N6-acetyllysine (By similarity).);TRANSIT (Mitochondrion.);DOMAIN (Lipoyl-binding.)	CHAIN (Dihydrolipoyllysine-residue succinyltransferase component of 2- oxoglutarate dehydrogenase complex, mitochondrial.)	ACT_SITE (Potential.)				266
P36957	TITELGEKAR	YES	Dihydrolipoyllysine-residue succinyltransferase component of 2-oxoglutarate dehydrogenase complex, mitochondrial	DLST;Dihydrolipoyllysine-residue succinyltransferase component of 2-oxoglutarate dehydrogenase complex, mitochondrial;2-oxoglutarate dehydrogenase complex component E2 Short=OGDC-E2 ;Dihydrolipoamide succinyltransferase component of 2-oxoglutarate dehydrogenase complex ;E2K;ODO2;	(Human)	14	EAMNFADIER	TITELGEKAR	346	453							MOD_RES (N6-lipoyllysine (Potential).);MOD_RES (N6-acetyllysine (By similarity).);TRANSIT (Mitochondrion.);DOMAIN (Lipoyl-binding.)	CHAIN (Dihydrolipoyllysine-residue succinyltransferase component of 2- oxoglutarate dehydrogenase complex, mitochondrial.)	ACT_SITE (Potential.)				278
P36957	VLLLDL	YES	Dihydrolipoyllysine-residue succinyltransferase component of 2-oxoglutarate dehydrogenase complex, mitochondrial	DLST;Dihydrolipoyllysine-residue succinyltransferase component of 2-oxoglutarate dehydrogenase complex, mitochondrial;2-oxoglutarate dehydrogenase complex component E2 Short=OGDC-E2 ;Dihydrolipoamide succinyltransferase component of 2-oxoglutarate dehydrogenase complex ;E2K;ODO2;	(Human)	14	KIKAAVEDPR	VLLLDL	448	453							MOD_RES (N6-lipoyllysine (Potential).);MOD_RES (N6-acetyllysine (By similarity).);TRANSIT (Mitochondrion.);ACT_SITE (Potential.);DOMAIN (Lipoyl-binding.)	CHAIN (Dihydrolipoyllysine-residue succinyltransferase component of 2- oxoglutarate dehydrogenase complex, mitochondrial.)					380
P38646	AGQISGLNVLR	YES	Stress-70 protein, mitochondrial	HSPA9;Stress-70 protein, mitochondrial;75 kDa glucose-regulated protein Short=GRP-75 ;Heat shock 70 kDa protein 9 ;Mortalin Short=MOT ;Peptide-binding protein 74 Short=PBP74;GRP75;	(Human)	5	NDSQRQATKD	AGQISGLNVL	208	679							MOD_RES (N6-acetyllysine (By similarity).);MOD_RES (N6-acetyllysine; alternate.);MOD_RES (N6-succinyllysine; alternate (By similarity).);MOD_RES (N6-acetyllysine.);MOD_RES (N6-acetyllysine; alternate (By similarity).);MOD_RES (N6-malonyllysine; alternate.);TRANSIT (Mitochondrion.)	CHAIN (Stress-70 protein, mitochondrial.)	MOD_RES (N6-acetyllysine.);MOD_RES (N6-acetyllysine; alternate.);MOD_RES (N6-succinyllysine; alternate (By similarity).);MOD_RES (N6-succinyllysine (By similarity).);MOD_RES (N6-acetyllysine; alternate (By similarity).);MOD_RES (N6-acetyllysine (By similarity).)				161
P38646	AQFEGIVTDLIR	YES	Stress-70 protein, mitochondrial	HSPA9;Stress-70 protein, mitochondrial;75 kDa glucose-regulated protein Short=GRP-75 ;Heat shock 70 kDa protein 9 ;Mortalin Short=MOT ;Peptide-binding protein 74 Short=PBP74;GRP75;	(Human)	5	PKHLNMKLTR	AQFEGIVTDL	349	679				MEP1A			MOD_RES (N6-acetyllysine (By similarity).);MOD_RES (N6-acetyllysine; alternate.);MOD_RES (N6-succinyllysine; alternate (By similarity).);MOD_RES (N6-acetyllysine.);MOD_RES (N6-acetyllysine; alternate (By similarity).);MOD_RES (N6-malonyllysine; alternate.);TRANSIT (Mitochondrion.)	CHAIN (Stress-70 protein, mitochondrial.)	MOD_RES (N6-succinyllysine (By similarity).);MOD_RES (N6-acetyllysine; alternate.);MOD_RES (N6-succinyllysine; alternate (By similarity).);MOD_RES (N6-acetyllysine; alternate (By similarity).);MOD_RES (N6-acetyllysine (By similarity).)				302
P38646	ASNGDAWVEAH	YES	Stress-70 protein, mitochondrial	HSPA9;Stress-70 protein, mitochondrial;75 kDa glucose-regulated protein Short=GRP-75 ;Heat shock 70 kDa protein 9 ;Mortalin Short=MOT ;Peptide-binding protein 74 Short=PBP74;GRP75;	(Human)	5	IKNVPFKIVR	ASNGDAWVEA	147	679				MEP1B;MEP1A			MOD_RES (N6-acetyllysine (By similarity).);MOD_RES (N6-acetyllysine; alternate.);MOD_RES (N6-succinyllysine; alternate (By similarity).);MOD_RES (N6-acetyllysine.);TRANSIT (Mitochondrion.)	CHAIN (Stress-70 protein, mitochondrial.)	MOD_RES (N6-acetyllysine; alternate (By similarity).);MOD_RES (N6-malonyllysine; alternate.);MOD_RES (N6-succinyllysine; alternate (By similarity).);MOD_RES (N6-acetyllysine.);MOD_RES (N6-acetyllysine; alternate.);MOD_RES (N6-succinyllysine (By similarity).);MOD_RES (N6-acetyllysine (By similarity).)				100
P38646	ETGVDLTKDNMALQR	YES	Stress-70 protein, mitochondrial	HSPA9;Stress-70 protein, mitochondrial;75 kDa glucose-regulated protein Short=GRP-75 ;Heat shock 70 kDa protein 9 ;Mortalin Short=MOT ;Peptide-binding protein 74 Short=PBP74;GRP75;	(Human)	5	LRHIVKEFKR	ETGVDLTKDN	293	679							MOD_RES (N6-acetyllysine (By similarity).);MOD_RES (N6-acetyllysine; alternate.);MOD_RES (N6-succinyllysine; alternate (By similarity).);MOD_RES (N6-acetyllysine.);MOD_RES (N6-acetyllysine; alternate (By similarity).);MOD_RES (N6-malonyllysine; alternate.);TRANSIT (Mitochondrion.)	CHAIN (Stress-70 protein, mitochondrial.)	MOD_RES (N6-acetyllysine; alternate.);MOD_RES (N6-succinyllysine; alternate (By similarity).);MOD_RES (N6-succinyllysine (By similarity).);MOD_RES (N6-acetyllysine; alternate (By similarity).);MOD_RES (N6-acetyllysine (By similarity).)				246
P38646	EVKSTNGDTFLGGEDFDQALLR	YES	Stress-70 protein, mitochondrial	HSPA9;Stress-70 protein, mitochondrial;75 kDa glucose-regulated protein Short=GRP-75 ;Heat shock 70 kDa protein 9 ;Mortalin Short=MOT ;Peptide-binding protein 74 Short=PBP74;GRP75;	(Human)	5	SILEIQKGVF	EVKSTNGDTF	263	679					Subtiligase Based Positive Selection		MOD_RES (N6-acetyllysine (By similarity).);MOD_RES (N6-acetyllysine; alternate.);MOD_RES (N6-succinyllysine; alternate (By similarity).);MOD_RES (N6-acetyllysine.);MOD_RES (N6-acetyllysine; alternate (By similarity).);MOD_RES (N6-malonyllysine; alternate.);TRANSIT (Mitochondrion.)	CHAIN (Stress-70 protein, mitochondrial.)	MOD_RES (N6-acetyllysine.);MOD_RES (N6-acetyllysine; alternate.);MOD_RES (N6-succinyllysine; alternate (By similarity).);MOD_RES (N6-succinyllysine (By similarity).);MOD_RES (N6-acetyllysine; alternate (By similarity).);MOD_RES (N6-acetyllysine (By similarity).)				216
P38646	HIVKEFKR	YES	Stress-70 protein, mitochondrial	HSPA9;Stress-70 protein, mitochondrial;75 kDa glucose-regulated protein Short=GRP-75 ;Heat shock 70 kDa protein 9 ;Mortalin Short=MOT ;Peptide-binding protein 74 Short=PBP74;GRP75;	(Human)	5	GEDFDQALLR	HIVKEFKRET	285	679							MOD_RES (N6-acetyllysine (By similarity).);MOD_RES (N6-acetyllysine; alternate.);MOD_RES (N6-succinyllysine; alternate (By similarity).);MOD_RES (N6-acetyllysine.);MOD_RES (N6-acetyllysine; alternate (By similarity).);MOD_RES (N6-malonyllysine; alternate.);TRANSIT (Mitochondrion.)	CHAIN (Stress-70 protein, mitochondrial.)	MOD_RES (N6-acetyllysine.);MOD_RES (N6-acetyllysine; alternate.);MOD_RES (N6-succinyllysine; alternate (By similarity).);MOD_RES (N6-succinyllysine (By similarity).);MOD_RES (N6-acetyllysine; alternate (By similarity).);MOD_RES (N6-acetyllysine (By similarity).)				238
P38646	QATKDAGQISGLNVLR	YES	Stress-70 protein, mitochondrial	HSPA9;Stress-70 protein, mitochondrial;75 kDa glucose-regulated protein Short=GRP-75 ;Heat shock 70 kDa protein 9 ;Mortalin Short=MOT ;Peptide-binding protein 74 Short=PBP74;GRP75;	(Human)	5	VPAYFNDSQR	QATKDAGQIS	203	679							MOD_RES (N6-acetyllysine (By similarity).);MOD_RES (N6-acetyllysine; alternate.);MOD_RES (N6-succinyllysine; alternate (By similarity).);MOD_RES (N6-acetyllysine.);TRANSIT (Mitochondrion.)	CHAIN (Stress-70 protein, mitochondrial.)	MOD_RES (N6-acetyllysine; alternate (By similarity).);MOD_RES (N6-malonyllysine; alternate.);MOD_RES (N6-succinyllysine; alternate (By similarity).);MOD_RES (N6-acetyllysine.);MOD_RES (N6-acetyllysine; alternate.);MOD_RES (N6-succinyllysine (By similarity).);MOD_RES (N6-acetyllysine (By similarity).)				156
P38646	QAVTNPNNTFYATKR	YES	Stress-70 protein, mitochondrial	HSPA9;Stress-70 protein, mitochondrial;75 kDa glucose-regulated protein Short=GRP-75 ;Heat shock 70 kDa protein 9 ;Mortalin Short=MOT ;Peptide-binding protein 74 Short=PBP74;GRP75;	(Human)	5	ERLVGMPAKR	QAVTNPNNTF	108	679							MOD_RES (N6-acetyllysine (By similarity).);TRANSIT (Mitochondrion.)	CHAIN (Stress-70 protein, mitochondrial.)	MOD_RES (N6-acetyllysine; alternate.);MOD_RES (N6-succinyllysine; alternate (By similarity).);MOD_RES (N6-acetyllysine.);MOD_RES (N6-acetyllysine; alternate (By similarity).);MOD_RES (N6-malonyllysine; alternate.);MOD_RES (N6-succinyllysine (By similarity).);MOD_RES (N6-acetyllysine (By similarity).)				61
P38646	TFLGGEDFDQALLR	YES	Stress-70 protein, mitochondrial	HSPA9;Stress-70 protein, mitochondrial;75 kDa glucose-regulated protein Short=GRP-75 ;Heat shock 70 kDa protein 9 ;Mortalin Short=MOT ;Peptide-binding protein 74 Short=PBP74;GRP75;	(Human)	5	VFEVKSTNGD	TFLGGEDFDQ	271	679					Subtiligase Based Positive Selection		MOD_RES (N6-acetyllysine (By similarity).);MOD_RES (N6-acetyllysine; alternate.);MOD_RES (N6-succinyllysine; alternate (By similarity).);MOD_RES (N6-acetyllysine.);MOD_RES (N6-acetyllysine; alternate (By similarity).);MOD_RES (N6-malonyllysine; alternate.);TRANSIT (Mitochondrion.)	CHAIN (Stress-70 protein, mitochondrial.)	MOD_RES (N6-acetyllysine.);MOD_RES (N6-acetyllysine; alternate.);MOD_RES (N6-succinyllysine; alternate (By similarity).);MOD_RES (N6-succinyllysine (By similarity).);MOD_RES (N6-acetyllysine; alternate (By similarity).);MOD_RES (N6-acetyllysine (By similarity).)				224
P38646	TKDAGQISGLNVLR	YES	Stress-70 protein, mitochondrial	HSPA9;Stress-70 protein, mitochondrial;75 kDa glucose-regulated protein Short=GRP-75 ;Heat shock 70 kDa protein 9 ;Mortalin Short=MOT ;Peptide-binding protein 74 Short=PBP74;GRP75;	(Human)	5	AYFNDSQRQA	TKDAGQISGL	205	679							MOD_RES (N6-acetyllysine (By similarity).);MOD_RES (N6-acetyllysine; alternate.);MOD_RES (N6-succinyllysine; alternate (By similarity).);MOD_RES (N6-acetyllysine.);TRANSIT (Mitochondrion.)	CHAIN (Stress-70 protein, mitochondrial.)	MOD_RES (N6-acetyllysine; alternate (By similarity).);MOD_RES (N6-malonyllysine; alternate.);MOD_RES (N6-succinyllysine; alternate (By similarity).);MOD_RES (N6-acetyllysine.);MOD_RES (N6-acetyllysine; alternate.);MOD_RES (N6-succinyllysine (By similarity).);MOD_RES (N6-acetyllysine (By similarity).)				158
P38646	TTPSVVAFTADGER	YES	Stress-70 protein, mitochondrial	HSPA9;Stress-70 protein, mitochondrial;75 kDa glucose-regulated protein Short=GRP-75 ;Heat shock 70 kDa protein 9 ;Mortalin Short=MOT ;Peptide-binding protein 74 Short=PBP74;GRP75;	(Human)	5	KVLENAEGAR	TTPSVVAFTA	86	679							MOD_RES (N6-acetyllysine (By similarity).);TRANSIT (Mitochondrion.)	CHAIN (Stress-70 protein, mitochondrial.)	MOD_RES (N6-acetyllysine; alternate.);MOD_RES (N6-succinyllysine; alternate (By similarity).);MOD_RES (N6-acetyllysine.);MOD_RES (N6-acetyllysine; alternate (By similarity).);MOD_RES (N6-malonyllysine; alternate.);MOD_RES (N6-succinyllysine (By similarity).);MOD_RES (N6-acetyllysine (By similarity).)				39
P38646	TVQDLFGR	YES	Stress-70 protein, mitochondrial	HSPA9;Stress-70 protein, mitochondrial;75 kDa glucose-regulated protein Short=GRP-75 ;Heat shock 70 kDa protein 9 ;Mortalin Short=MOT ;Peptide-binding protein 74 Short=PBP74;GRP75;	(Human)	5	GMTRMPKVQQ	TVQDLFGRAP	398	679							MOD_RES (N6-acetyllysine (By similarity).);MOD_RES (N6-acetyllysine; alternate.);MOD_RES (N6-succinyllysine; alternate (By similarity).);MOD_RES (N6-acetyllysine.);MOD_RES (N6-acetyllysine; alternate (By similarity).);MOD_RES (N6-malonyllysine; alternate.);MOD_RES (N6-succinyllysine (By similarity).);TRANSIT (Mitochondrion.)	CHAIN (Stress-70 protein, mitochondrial.)	MOD_RES (N6-acetyllysine; alternate.);MOD_RES (N6-succinyllysine; alternate (By similarity).);MOD_RES (N6-acetyllysine; alternate (By similarity).);MOD_RES (N6-succinyllysine (By similarity).);MOD_RES (N6-acetyllysine (By similarity).)				351
P38646	VINEPTAAALAY	YES	Stress-70 protein, mitochondrial	HSPA9;Stress-70 protein, mitochondrial;75 kDa glucose-regulated protein Short=GRP-75 ;Heat shock 70 kDa protein 9 ;Mortalin Short=MOT ;Peptide-binding protein 74 Short=PBP74;GRP75;	(Human)	5	GQISGLNVLR	VINEPTAAAL	219	679							MOD_RES (N6-acetyllysine (By similarity).);MOD_RES (N6-acetyllysine; alternate.);MOD_RES (N6-succinyllysine; alternate (By similarity).);MOD_RES (N6-acetyllysine.);MOD_RES (N6-acetyllysine; alternate (By similarity).);MOD_RES (N6-malonyllysine; alternate.);TRANSIT (Mitochondrion.)	CHAIN (Stress-70 protein, mitochondrial.)	MOD_RES (N6-acetyllysine.);MOD_RES (N6-acetyllysine; alternate.);MOD_RES (N6-succinyllysine; alternate (By similarity).);MOD_RES (N6-succinyllysine (By similarity).);MOD_RES (N6-acetyllysine; alternate (By similarity).);MOD_RES (N6-acetyllysine (By similarity).)				172
P38646	VLENAEGAR	YES	Stress-70 protein, mitochondrial	HSPA9;Stress-70 protein, mitochondrial;75 kDa glucose-regulated protein Short=GRP-75 ;Heat shock 70 kDa protein 9 ;Mortalin Short=MOT ;Peptide-binding protein 74 Short=PBP74;GRP75;	(Human)	5	VAVMEGKQAK	VLENAEGART	77	679							MOD_RES (N6-acetyllysine (By similarity).);TRANSIT (Mitochondrion.)	CHAIN (Stress-70 protein, mitochondrial.)	MOD_RES (N6-acetyllysine; alternate.);MOD_RES (N6-succinyllysine; alternate (By similarity).);MOD_RES (N6-acetyllysine.);MOD_RES (N6-acetyllysine; alternate (By similarity).);MOD_RES (N6-malonyllysine; alternate.);MOD_RES (N6-succinyllysine (By similarity).);MOD_RES (N6-acetyllysine (By similarity).)				30
P38646	YDDPEVQKDIKNVPFKIVR	YES	Stress-70 protein, mitochondrial	HSPA9;Stress-70 protein, mitochondrial;75 kDa glucose-regulated protein Short=GRP-75 ;Heat shock 70 kDa protein 9 ;Mortalin Short=MOT ;Peptide-binding protein 74 Short=PBP74;GRP75;	(Human)	5	YATKRLIGRR	YDDPEVQKDI	128	679							MOD_RES (N6-acetyllysine (By similarity).);TRANSIT (Mitochondrion.)	CHAIN (Stress-70 protein, mitochondrial.)	MOD_RES (N6-acetyllysine; alternate.);MOD_RES (N6-succinyllysine; alternate (By similarity).);MOD_RES (N6-acetyllysine.);MOD_RES (N6-acetyllysine; alternate (By similarity).);MOD_RES (N6-malonyllysine; alternate.);MOD_RES (N6-succinyllysine (By similarity).);MOD_RES (N6-acetyllysine (By similarity).)				81
P40926	ANTFVAELKGLDPAR	YES	Malate dehydrogenase, mitochondrial	MDH2;Malate dehydrogenase, mitochondrial;MDHM;	(Human)	7	FGVTTLDIVR	ANTFVAELKG	177	338							MOD_RES (N6-acetyllysine; alternate (By similarity).);MOD_RES (N6-succinyllysine; alternate (By similarity).);MOD_RES (N6-acetyllysine.);NP_BIND (NAD.);TRANSIT (Mitochondrion (By similarity).);BINDING (NAD.);BINDING (Substrate.)	CHAIN (Malate dehydrogenase, mitochondrial.)	MOD_RES (N6-acetyllysine; alternate.);MOD_RES (N6-succinyllysine; alternate (By similarity).);MOD_RES (N6-succinyllysine (By similarity).);MOD_RES (N6-acetyllysine; alternate (By similarity).);MOD_RES (N6-malonyllysine; alternate (By similarity).);MOD_RES (N6-malonyllysine; alternate.);BINDING (NAD.);ACT_SITE (Proton acceptor (By similarity).);MUTAGEN (K->R: No activation of enzyme activity on tr…				152
P40926	IQEAGTEVVKAK	YES	Malate dehydrogenase, mitochondrial	MDH2;Malate dehydrogenase, mitochondrial;MDHM;	(Human)	7	QDQLTALTGR	IQEAGTEVVK	230	338							MOD_RES (N6-acetyllysine; alternate (By similarity).);MOD_RES (N6-succinyllysine; alternate (By similarity).);MOD_RES (N6-acetyllysine.);MOD_RES (N6-acetyllysine; alternate.);MOD_RES (N6-succinyllysine (By similarity).);NP_BIND (NAD.);TRANSIT (Mitochondrion (By similarity).);BINDING (NAD.);BINDING (Substrate.);ACT_SITE (Proton acceptor (By similarity).);MUTAGEN (K->R: No activation of enzyme acti…	CHAIN (Malate dehydrogenase, mitochondrial.)	MOD_RES (N6-acetyllysine; alternate (By similarity).);MOD_RES (N6-malonyllysine; alternate (By similarity).);MOD_RES (N6-succinyllysine; alternate (By similarity).);MOD_RES (N6-succinyllysine (By similarity).);MOD_RES (N6-acetyllysine; alternate.);MOD_RES (N6-malonyllysine; alternate.);BINDING (NAD.);MUTAGEN (K->R: No activation of enzyme activity on treatment with TSA or NAM; when associated wit…				205
P42704	AARAGPVAGGLLSPAR	YES	Leucine-rich PPR motif-containing protein, mitochondrial	LRPPRC;Leucine-rich PPR motif-containing protein, mitochondrial;130 kDa leucine-rich protein Short=LRP 130 ;GP130;LPPRC;	(Human)	2	GRLHAASYLP	AARAGPVAGG	42	1394								TRANSIT (Mitochondrion (Potential).)	CHAIN (Leucine-rich PPR motif-containing protein, mitochondrial.);MOD_RES (N6-acetyllysine.);MOD_RES (N6-acetyllysine (By similarity).);REGION (RNA-binding.);REPEAT (PPR 1.);REPEAT (PPR 2.);REPEAT (PPR 3.);REPEAT (PPR 4.);REPEAT (PPR 5.);REPEAT (PPR 6.);REPEAT (PPR 7.);REPEAT (PPR 8.);REPEAT (PPR 9.);REPEAT (PPR 10.);REPEAT (PPR 11.);REPEAT (PPR 12.);REPEAT (PPR 13.);REPEAT (PPR 14.);REPEAT (PPR …				-18
P42704	ADAVWNKIQEENVIPR	YES	Leucine-rich PPR motif-containing protein, mitochondrial	LRPPRC;Leucine-rich PPR motif-containing protein, mitochondrial;130 kDa leucine-rich protein Short=LRP 130 ;GP130;LPPRC;	(Human)	2	LYKINGDWQR	ADAVWNKIQE	974	1394							MOD_RES (N6-acetyllysine.);MOD_RES (N6-acetyllysine (By similarity).);REPEAT (PPR 1.);REPEAT (PPR 2.);REPEAT (PPR 3.);REPEAT (PPR 4.);REPEAT (PPR 5.);REPEAT (PPR 6.);REPEAT (PPR 7.);REPEAT (PPR 8.);REPEAT (PPR 9.);REPEAT (PPR 10.);REPEAT (PPR 11.);REPEAT (PPR 12.);REPEAT (PPR 13.);TRANSIT (Mitochondrion (Potential).)	CHAIN (Leucine-rich PPR motif-containing protein, mitochondrial.);REPEAT (PPR 14.)	REGION (RNA-binding.);REPEAT (PPR 15.);REPEAT (PPR 16.);REPEAT (PPR 17.);REPEAT (PPR 18.);REPEAT (PPR 19.);REPEAT (PPR 20.)				914
P42704	AEILR	YES	Leucine-rich PPR motif-containing protein, mitochondrial	LRPPRC;Leucine-rich PPR motif-containing protein, mitochondrial;130 kDa leucine-rich protein Short=LRP 130 ;GP130;LPPRC;	(Human)	2	IPREKTLRLL	AEILREGNQE	997	1394							MOD_RES (N6-acetyllysine.);MOD_RES (N6-acetyllysine (By similarity).);REPEAT (PPR 1.);REPEAT (PPR 2.);REPEAT (PPR 3.);REPEAT (PPR 4.);REPEAT (PPR 5.);REPEAT (PPR 6.);REPEAT (PPR 7.);REPEAT (PPR 8.);REPEAT (PPR 9.);REPEAT (PPR 10.);REPEAT (PPR 11.);REPEAT (PPR 12.);REPEAT (PPR 13.);REPEAT (PPR 14.);TRANSIT (Mitochondrion (Potential).)	CHAIN (Leucine-rich PPR motif-containing protein, mitochondrial.)	REGION (RNA-binding.);REPEAT (PPR 15.);REPEAT (PPR 16.);REPEAT (PPR 17.);REPEAT (PPR 18.);REPEAT (PPR 19.);REPEAT (PPR 20.)				937
P42704	AGDMENAENILTVMR	YES	Leucine-rich PPR motif-containing protein, mitochondrial	LRPPRC;Leucine-rich PPR motif-containing protein, mitochondrial;130 kDa leucine-rich protein Short=LRP 130 ;GP130;LPPRC;	(Human)	2	FSALVTGHAR	AGDMENAENI	245	1394							MOD_RES (N6-acetyllysine.);MOD_RES (N6-acetyllysine (By similarity).);REPEAT (PPR 1.);REPEAT (PPR 2.);REPEAT (PPR 3.);TRANSIT (Mitochondrion (Potential).)	CHAIN (Leucine-rich PPR motif-containing protein, mitochondrial.);REPEAT (PPR 4.)	MOD_RES (N6-acetyllysine.);MOD_RES (N6-acetyllysine (By similarity).);REGION (RNA-binding.);REPEAT (PPR 5.);REPEAT (PPR 6.);REPEAT (PPR 7.);REPEAT (PPR 8.);REPEAT (PPR 9.);REPEAT (PPR 10.);REPEAT (PPR 11.);REPEAT (PPR 12.);REPEAT (PPR 13.);REPEAT (PPR 14.);REPEAT (PPR 15.);REPEAT (PPR 16.);REPEAT (PPR 17.);REPEAT (PPR 18.);REPEAT (PPR 19.);REPEAT (PPR 20.)				185
P42704	AIAAKEKDIQEESTFSSR	YES	Leucine-rich PPR motif-containing protein, mitochondrial	LRPPRC;Leucine-rich PPR motif-containing protein, mitochondrial;130 kDa leucine-rich protein Short=LRP 130 ;GP130;LPPRC;	(Human)	2	GGLLSPARLY	AIAAKEKDIQ	60	1394	X	X			unknown;Subtiligase Based Positive Selection		TRANSIT (Mitochondrion (Potential).)		CHAIN (Leucine-rich PPR motif-containing protein, mitochondrial.);MOD_RES (N6-acetyllysine.);MOD_RES (N6-acetyllysine (By similarity).);REGION (RNA-binding.);REPEAT (PPR 1.);REPEAT (PPR 2.);REPEAT (PPR 3.);REPEAT (PPR 4.);REPEAT (PPR 5.);REPEAT (PPR 6.);REPEAT (PPR 7.);REPEAT (PPR 8.);REPEAT (PPR 9.);REPEAT (PPR 10.);REPEAT (PPR 11.);REPEAT (PPR 12.);REPEAT (PPR 13.);REPEAT (PPR 14.);REPEAT (PPR …				0
P42704	AILQENGCLSDSDMFSQAGLR	YES	Leucine-rich PPR motif-containing protein, mitochondrial	LRPPRC;Leucine-rich PPR motif-containing protein, mitochondrial;130 kDa leucine-rich protein Short=LRP 130 ;GP130;LPPRC;	(Human)	2	PCFDSVNSAR	AILQENGCLS	493	1394							MOD_RES (N6-acetyllysine.);MOD_RES (N6-acetyllysine (By similarity).);REPEAT (PPR 1.);REPEAT (PPR 2.);REPEAT (PPR 3.);REPEAT (PPR 4.);REPEAT (PPR 5.);REPEAT (PPR 6.);REPEAT (PPR 7.);REPEAT (PPR 8.);TRANSIT (Mitochondrion (Potential).)	CHAIN (Leucine-rich PPR motif-containing protein, mitochondrial.)	MOD_RES (N6-acetyllysine.);REGION (RNA-binding.);REPEAT (PPR 9.);REPEAT (PPR 10.);REPEAT (PPR 11.);REPEAT (PPR 12.);REPEAT (PPR 13.);REPEAT (PPR 14.);REPEAT (PPR 15.);REPEAT (PPR 16.);REPEAT (PPR 17.);REPEAT (PPR 18.);REPEAT (PPR 19.);REPEAT (PPR 20.)				433
P42704	LDSSAVLDTGKYVGLVR	YES	Leucine-rich PPR motif-containing protein, mitochondrial	LRPPRC;Leucine-rich PPR motif-containing protein, mitochondrial;130 kDa leucine-rich protein Short=LRP 130 ;GP130;LPPRC;	(Human)	2	ALNLKEEFDR	LDSSAVLDTG	740	1394					Subtiligase Based Positive Selection		MOD_RES (N6-acetyllysine.);MOD_RES (N6-acetyllysine (By similarity).);REPEAT (PPR 1.);REPEAT (PPR 2.);REPEAT (PPR 3.);REPEAT (PPR 4.);REPEAT (PPR 5.);REPEAT (PPR 6.);REPEAT (PPR 7.);REPEAT (PPR 8.);REPEAT (PPR 9.);TRANSIT (Mitochondrion (Potential).)	CHAIN (Leucine-rich PPR motif-containing protein, mitochondrial.);REPEAT (PPR 10.)	MOD_RES (N6-acetyllysine.);REGION (RNA-binding.);REPEAT (PPR 11.);REPEAT (PPR 12.);REPEAT (PPR 13.);REPEAT (PPR 14.);REPEAT (PPR 15.);REPEAT (PPR 16.);REPEAT (PPR 17.);REPEAT (PPR 18.);REPEAT (PPR 19.);REPEAT (PPR 20.)				680
P42704	QAGLR	YES	Leucine-rich PPR motif-containing protein, mitochondrial	LRPPRC;Leucine-rich PPR motif-containing protein, mitochondrial;130 kDa leucine-rich protein Short=LRP 130 ;GP130;LPPRC;	(Human)	2	GCLSDSDMFS	QAGLRSEAAN	509	1394							MOD_RES (N6-acetyllysine.);MOD_RES (N6-acetyllysine (By similarity).);REPEAT (PPR 1.);REPEAT (PPR 2.);REPEAT (PPR 3.);REPEAT (PPR 4.);REPEAT (PPR 5.);REPEAT (PPR 6.);REPEAT (PPR 7.);REPEAT (PPR 8.);TRANSIT (Mitochondrion (Potential).)	CHAIN (Leucine-rich PPR motif-containing protein, mitochondrial.)	MOD_RES (N6-acetyllysine.);REGION (RNA-binding.);REPEAT (PPR 9.);REPEAT (PPR 10.);REPEAT (PPR 11.);REPEAT (PPR 12.);REPEAT (PPR 13.);REPEAT (PPR 14.);REPEAT (PPR 15.);REPEAT (PPR 16.);REPEAT (PPR 17.);REPEAT (PPR 18.);REPEAT (PPR 19.);REPEAT (PPR 20.)				449
P42704	SGGLGGSHALLLLR	YES	Leucine-rich PPR motif-containing protein, mitochondrial	LRPPRC;Leucine-rich PPR motif-containing protein, mitochondrial;130 kDa leucine-rich protein Short=LRP 130 ;GP130;LPPRC;	(Human)	2	LQKVFNDTCR	SGGLGGSHAL	115	1394							TRANSIT (Mitochondrion (Potential).)	CHAIN (Leucine-rich PPR motif-containing protein, mitochondrial.)	MOD_RES (N6-acetyllysine.);MOD_RES (N6-acetyllysine (By similarity).);REGION (RNA-binding.);REPEAT (PPR 1.);REPEAT (PPR 2.);REPEAT (PPR 3.);REPEAT (PPR 4.);REPEAT (PPR 5.);REPEAT (PPR 6.);REPEAT (PPR 7.);REPEAT (PPR 8.);REPEAT (PPR 9.);REPEAT (PPR 10.);REPEAT (PPR 11.);REPEAT (PPR 12.);REPEAT (PPR 13.);REPEAT (PPR 14.);REPEAT (PPR 15.);REPEAT (PPR 16.);REPEAT (PPR 17.);REPEAT (PPR 18.);REPEAT (PP…				55
P42704	SSLLLGFR	YES	Leucine-rich PPR motif-containing protein, mitochondrial	LRPPRC;Leucine-rich PPR motif-containing protein, mitochondrial;130 kDa leucine-rich protein Short=LRP 130 ;GP130;LPPRC;	(Human)	2	TLPISLQSIR	SSLLLGFRRS	542	1394							MOD_RES (N6-acetyllysine.);MOD_RES (N6-acetyllysine (By similarity).);REPEAT (PPR 1.);REPEAT (PPR 2.);REPEAT (PPR 3.);REPEAT (PPR 4.);REPEAT (PPR 5.);REPEAT (PPR 6.);REPEAT (PPR 7.);REPEAT (PPR 8.);TRANSIT (Mitochondrion (Potential).)	CHAIN (Leucine-rich PPR motif-containing protein, mitochondrial.)	MOD_RES (N6-acetyllysine.);REGION (RNA-binding.);REPEAT (PPR 9.);REPEAT (PPR 10.);REPEAT (PPR 11.);REPEAT (PPR 12.);REPEAT (PPR 13.);REPEAT (PPR 14.);REPEAT (PPR 15.);REPEAT (PPR 16.);REPEAT (PPR 17.);REPEAT (PPR 18.);REPEAT (PPR 19.);REPEAT (PPR 20.)				482
P42704	TLPISLQSIR	YES	Leucine-rich PPR motif-containing protein, mitochondrial	LRPPRC;Leucine-rich PPR motif-containing protein, mitochondrial;130 kDa leucine-rich protein Short=LRP 130 ;GP130;LPPRC;	(Human)	2	DFVLSFLKSN	TLPISLQSIR	532	1394							MOD_RES (N6-acetyllysine.);MOD_RES (N6-acetyllysine (By similarity).);REPEAT (PPR 1.);REPEAT (PPR 2.);REPEAT (PPR 3.);REPEAT (PPR 4.);REPEAT (PPR 5.);REPEAT (PPR 6.);REPEAT (PPR 7.);REPEAT (PPR 8.);TRANSIT (Mitochondrion (Potential).)	CHAIN (Leucine-rich PPR motif-containing protein, mitochondrial.)	MOD_RES (N6-acetyllysine.);REGION (RNA-binding.);REPEAT (PPR 9.);REPEAT (PPR 10.);REPEAT (PPR 11.);REPEAT (PPR 12.);REPEAT (PPR 13.);REPEAT (PPR 14.);REPEAT (PPR 15.);REPEAT (PPR 16.);REPEAT (PPR 17.);REPEAT (PPR 18.);REPEAT (PPR 19.);REPEAT (PPR 20.)				472
P42704	VKIPENIYR	YES	Leucine-rich PPR motif-containing protein, mitochondrial	LRPPRC;Leucine-rich PPR motif-containing protein, mitochondrial;130 kDa leucine-rich protein Short=LRP 130 ;GP130;LPPRC;	(Human)	2	QYFHQLEKMN	VKIPENIYRG	616	1394							MOD_RES (N6-acetyllysine.);MOD_RES (N6-acetyllysine (By similarity).);REPEAT (PPR 1.);REPEAT (PPR 2.);REPEAT (PPR 3.);REPEAT (PPR 4.);REPEAT (PPR 5.);REPEAT (PPR 6.);REPEAT (PPR 7.);REPEAT (PPR 8.);TRANSIT (Mitochondrion (Potential).)	CHAIN (Leucine-rich PPR motif-containing protein, mitochondrial.)	MOD_RES (N6-acetyllysine.);REGION (RNA-binding.);REPEAT (PPR 9.);REPEAT (PPR 10.);REPEAT (PPR 11.);REPEAT (PPR 12.);REPEAT (PPR 13.);REPEAT (PPR 14.);REPEAT (PPR 15.);REPEAT (PPR 16.);REPEAT (PPR 17.);REPEAT (PPR 18.);REPEAT (PPR 19.);REPEAT (PPR 20.)				556
P43304	ADCISEPVNR	YES	Glycerol-3-phosphate dehydrogenase, mitochondrial	GPD2;Glycerol-3-phosphate dehydrogenase, mitochondrial;mtGPD;GPDM;	(Human)	2	KQMNLAYVKA	ADCISEPVNR	43	727	X	X					TRANSIT (Mitochondrion (By similarity).)		CHAIN (Glycerol-3-phosphate dehydrogenase, mitochondrial.);MOD_RES (Phosphotyrosine (By similarity).);NP_BIND (FAD (Potential).);DOMAIN (EF-hand 1.);DOMAIN (EF-hand 2.);CA_BIND (Potential.)				0
P43304	ADCISEPVNREPPSR	YES	Glycerol-3-phosphate dehydrogenase, mitochondrial	GPD2;Glycerol-3-phosphate dehydrogenase, mitochondrial;mtGPD;GPDM;	(Human)	2	KQMNLAYVKA	ADCISEPVNR	43	727	X	X					TRANSIT (Mitochondrion (By similarity).)		CHAIN (Glycerol-3-phosphate dehydrogenase, mitochondrial.);MOD_RES (Phosphotyrosine (By similarity).);NP_BIND (FAD (Potential).);DOMAIN (EF-hand 1.);DOMAIN (EF-hand 2.);CA_BIND (Potential.)				0
P43897	ASASSKELLMKLR	YES	Elongation factor Ts, mitochondrial	TSFM;Elongation factor Ts, mitochondrial;EFTS;	(Human)	12	HTFYAGPRLS	ASASSKELLM	42	325					Subtiligase Based Positive Selection			TRANSIT (Mitochondrion (Potential).)	CHAIN (Elongation factor Ts, mitochondrial.);MOD_RES (N6-succinyllysine (By similarity).);MOD_RES (Phosphothreonine.)				-4
P45880	NNFAVGYR	YES	Voltage-dependent anion-selective channel protein 2	VDAC2;Voltage-dependent anion-selective channel protein 2;Outer mitochondrial membrane protein porin 2;VDAC2;	(Human)	10	FDSAKSKLTR	NNFAVGYRTG	178	294							MOD_RES (N-acetylalanine.);MOD_RES (N6-acetyllysine; alternate.);MOD_RES (N6-succinyllysine; alternate (By similarity).);MOD_RES (N6-acetyllysine (By similarity).);TRANSMEM (Beta stranded; (By similarity).);SITE (Involved in hexokinase binding (By similarity).);INIT_MET (Removed.)	TRANSMEM (Beta stranded; (By similarity).);CHAIN (Voltage-dependent anion-selective channel protein 2.)	TRANSMEM (Beta stranded; (By similarity).);NP_BIND (NAD (By similarity).)			90
P47985	SHTDIKVPDFSEYR	YES	Cytochrome b-c1 complex subunit Rieske, mitochondrial	UQCRFS1;Cytochrome b-c1 complex subunit Rieske, mitochondrial;Complex III subunit 5 ;Cytochrome b-c1 complex subunit 5 ;Rieske iron-sulfur protein Short=RISP ;Ubiquinol-cytochrome c reductase iron-sulfur subunit;UCRI;	(Human)	19	GLNVPASVCY	SHTDIKVPDF	79	274	X	X			unknown		TRANSIT (Mitochondrion.);CHAIN (Cytochrome b-c1 complex subunit 11 (By similarity).)		DOMAIN (Rieske.);METAL (Iron-sulfur (2Fe-2S) (By similarity).);METAL (Iron-sulfur (2Fe-2S); via pros nitrogen (By similarity).);TRANSMEM (Helical; (By similarity).);DISULFID (By similarity.);CHAIN (Cytochrome b-c1 complex subunit Rieske, mitochondrial.)			-62	0
P47985	SHTDIKVPDFSEYRR	YES	Cytochrome b-c1 complex subunit Rieske, mitochondrial	UQCRFS1;Cytochrome b-c1 complex subunit Rieske, mitochondrial;Complex III subunit 5 ;Cytochrome b-c1 complex subunit 5 ;Rieske iron-sulfur protein Short=RISP ;Ubiquinol-cytochrome c reductase iron-sulfur subunit;UCRI;	(Human)	19	GLNVPASVCY	SHTDIKVPDF	79	274	X	X			unknown		TRANSIT (Mitochondrion.);CHAIN (Cytochrome b-c1 complex subunit 11 (By similarity).)		DOMAIN (Rieske.);METAL (Iron-sulfur (2Fe-2S) (By similarity).);METAL (Iron-sulfur (2Fe-2S); via pros nitrogen (By similarity).);TRANSMEM (Helical; (By similarity).);DISULFID (By similarity.);CHAIN (Cytochrome b-c1 complex subunit Rieske, mitochondrial.)			-62	0
P48735	EPIICKNIPR	YES	Isocitrate dehydrogenase [NADP], mitochondrial	IDH2;Isocitrate dehydrogenase [NADP], mitochondrial;ICD-M ;IDP ;NADP(+)-specific ICDH ;Oxalosuccinate decarboxylase;IDHP;	(Human)	15	RNILGGTVFR	EPIICKNIPR	150	452							MOD_RES (N6-acetyllysine (By similarity).);MOD_RES (N6-acetyllysine.);MOD_RES (N6-acetyllysine; alternate (By similarity).);MOD_RES (N6-succinyllysine; alternate (By similarity).);MOD_RES (N6-acetyllysine; alternate.);REGION (Substrate binding (By similarity).);NP_BIND (NADP (By similarity).);TRANSIT (Mitochondrion (By similarity).);BINDING (Substrate (By similarity).);BINDING (NADP (By similarit…	CHAIN (Isocitrate dehydrogenase [NADP], mitochondrial.)	METAL (Magnesium or manganese (By similarity).);MOD_RES (N6-acetyllysine.);MOD_RES (N6-acetyllysine; alternate.);MOD_RES (N6-succinyllysine; alternate (By similarity).);MOD_RES (N6-acetyllysine; alternate (By similarity).);MOD_RES (N6-acetyllysine (By similarity).);NP_BIND (NADP (By similarity).);BINDING (Substrate (By similarity).);BINDING (NADP (By similarity).);BINDING (NADP; via amide nitroge…				110
P48735	GKLDGNQDLIR	YES	Isocitrate dehydrogenase [NADP], mitochondrial	IDH2;Isocitrate dehydrogenase [NADP], mitochondrial;ICD-M ;IDP ;NADP(+)-specific ICDH ;Oxalosuccinate decarboxylase;IDHP;	(Human)	15	FAWTRGLEHR	GKLDGNQDLI	383	452							METAL (Magnesium or manganese (By similarity).);MOD_RES (N6-acetyllysine (By similarity).);MOD_RES (N6-acetyllysine.);MOD_RES (N6-acetyllysine; alternate (By similarity).);MOD_RES (N6-succinyllysine; alternate (By similarity).);MOD_RES (N6-acetyllysine; alternate.);REGION (Substrate binding (By similarity).);NP_BIND (NADP (By similarity).);TRANSIT (Mitochondrion (By similarity).);BINDING (Substra…	CHAIN (Isocitrate dehydrogenase [NADP], mitochondrial.)	MOD_RES (N6-acetyllysine; alternate (By similarity).);MOD_RES (N6-succinyllysine; alternate (By similarity).);MOD_RES (N6-acetyllysine (By similarity).);MOD_RES (N6-acetyllysine.);MUTAGEN (K->A: 44-fold loss in activity.);MUTAGEN (K->Q: 20-fold decrease in Vmax.);MUTAGEN (K->R: No appreciable difference in Km for isocitrate and NADP.)				343
P48735	NILGGTVFR	YES	Isocitrate dehydrogenase [NADP], mitochondrial	IDH2;Isocitrate dehydrogenase [NADP], mitochondrial;ICD-M ;IDP ;NADP(+)-specific ICDH ;Oxalosuccinate decarboxylase;IDHP;	(Human)	15	MWKSPNGTIR	NILGGTVFRE	141	452							MOD_RES (N6-acetyllysine (By similarity).);MOD_RES (N6-acetyllysine.);MOD_RES (N6-acetyllysine; alternate (By similarity).);MOD_RES (N6-succinyllysine; alternate (By similarity).);MOD_RES (N6-acetyllysine; alternate.);REGION (Substrate binding (By similarity).);NP_BIND (NADP (By similarity).);TRANSIT (Mitochondrion (By similarity).);BINDING (Substrate (By similarity).);BINDING (NADP (By similarit…	CHAIN (Isocitrate dehydrogenase [NADP], mitochondrial.)	METAL (Magnesium or manganese (By similarity).);MOD_RES (N6-acetyllysine.);MOD_RES (N6-acetyllysine; alternate.);MOD_RES (N6-succinyllysine; alternate (By similarity).);MOD_RES (N6-acetyllysine; alternate (By similarity).);MOD_RES (N6-acetyllysine (By similarity).);NP_BIND (NADP (By similarity).);BINDING (Substrate (By similarity).);BINDING (NADP (By similarity).);BINDING (NADP; via amide nitroge…				101
P49411	AAHVEYSTAAR	YES	Elongation factor Tu, mitochondrial	TUFM;Elongation factor Tu, mitochondrial;P43;EFTU;	(Human)	16	EERARGITIN	AAHVEYSTAA	110	452					Subtiligase Based Positive Selection		MOD_RES (N6-acetyllysine.);NP_BIND (GTP (By similarity).);TRANSIT (Mitochondrion.)	CHAIN (Elongation factor Tu, mitochondrial.)	MOD_RES (N6-acetyllysine.);NP_BIND (GTP (By similarity).)				66
P49411	AEAGDNLGALVR	YES	Elongation factor Tu, mitochondrial	TUFM;Elongation factor Tu, mitochondrial;P43;EFTU;	(Human)	16	IEMFHKSLER	AEAGDNLGAL	316	452							MOD_RES (N6-acetyllysine.);NP_BIND (GTP (By similarity).);TRANSIT (Mitochondrion.)	CHAIN (Elongation factor Tu, mitochondrial.)	MOD_RES (N6-acetyllysine.)				272
P49411	AVEAKKTYVR	YES	Elongation factor Tu, mitochondrial	TUFM;Elongation factor Tu, mitochondrial;P43;EFTU;	(Human)	16	PALPLLCRGL	AVEAKKTYVR	44	452	X	X			Subtiligase Based Positive Selection;unknown		TRANSIT (Mitochondrion.)		CHAIN (Elongation factor Tu, mitochondrial.);MOD_RES (N6-acetyllysine.);NP_BIND (GTP (By similarity).)				0
P49411	DLEKPFLLPVEAVYSVPGR	YES	Elongation factor Tu, mitochondrial	TUFM;Elongation factor Tu, mitochondrial;P43;EFTU;	(Human)	16	VDTYIPVPAR	DLEKPFLLPV	253	452							MOD_RES (N6-acetyllysine.);NP_BIND (GTP (By similarity).);TRANSIT (Mitochondrion.)	CHAIN (Elongation factor Tu, mitochondrial.)	MOD_RES (N6-acetyllysine.)				209
P49411	GITINAAHVEYSTAAR	YES	Elongation factor Tu, mitochondrial	TUFM;Elongation factor Tu, mitochondrial;P43;EFTU;	(Human)	16	IDNAPEERAR	GITINAAHVE	105	452							MOD_RES (N6-acetyllysine.);NP_BIND (GTP (By similarity).);TRANSIT (Mitochondrion.)	CHAIN (Elongation factor Tu, mitochondrial.)	MOD_RES (N6-acetyllysine.);NP_BIND (GTP (By similarity).)				61
P49411	GTVVTGTLER	YES	Elongation factor Tu, mitochondrial	TUFM;Elongation factor Tu, mitochondrial;P43;EFTU;	(Human)	16	VEAVYSVPGR	GTVVTGTLER	272	452							MOD_RES (N6-acetyllysine.);NP_BIND (GTP (By similarity).);TRANSIT (Mitochondrion.)	CHAIN (Elongation factor Tu, mitochondrial.)	MOD_RES (N6-acetyllysine.)				228
P49411	QPMILEKGQR	YES	Elongation factor Tu, mitochondrial	TUFM;Elongation factor Tu, mitochondrial;P43;EFTU;	(Human)	16	EDLKFNLILR	QPMILEKGQR	412	452							MOD_RES (N6-acetyllysine.);NP_BIND (GTP (By similarity).);TRANSIT (Mitochondrion.)	CHAIN (Elongation factor Tu, mitochondrial.)	MOD_RES (N6-acetyllysine.)				368
P49748	AGGAAQLALDKSDSHPSDALTR	YES	Very long-chain specific acyl-CoA dehydrogenase, mitochondrial	ACADVL;Very long-chain specific acyl-CoA dehydrogenase, mitochondrial;ACADV;	(Human)	17	PRPGPARRPY	AGGAAQLALD	41	655	X	X			unknown;Subtiligase Based Positive Selection		TRANSIT (Mitochondrion (By similarity).)		NP_BIND (FAD.);NP_BIND (FAD (By similarity).);CROSSLNK (Glycyl lysine isopeptide (Lys-Gly) (interchain with G-Cter in ubiquitin); alternate (By similarity).);MOD_RES (N6-acetyllysine (By similarity).);MOD_RES (N6-acetyllysine; alternate (By similarity).);MOD_RES (N6-succinyllysine; alternate (By similarity).);MOD_RES (N6-succinyllysine (By similarity).);MOD_RES (S-nitrosocysteine (By similarity).…				0
P49748	GGAAQLALDKSDSHPSDALTR	YES	Very long-chain specific acyl-CoA dehydrogenase, mitochondrial	ACADVL;Very long-chain specific acyl-CoA dehydrogenase, mitochondrial;ACADV;	(Human)	17	RPGPARRPYA	GGAAQLALDK	42	655	X	X			unknown;Subtiligase Based Positive Selection		TRANSIT (Mitochondrion (By similarity).)	CHAIN (Very long-chain specific acyl-CoA dehydrogenase, mitochondrial.);REGION (Catalytic.)	NP_BIND (FAD.);NP_BIND (FAD (By similarity).);CROSSLNK (Glycyl lysine isopeptide (Lys-Gly) (interchain with G-Cter in ubiquitin); alternate (By similarity).);MOD_RES (N6-acetyllysine (By similarity).);MOD_RES (N6-acetyllysine; alternate (By similarity).);MOD_RES (N6-succinyllysine; alternate (By similarity).);MOD_RES (N6-succinyllysine (By similarity).);MOD_RES (S-nitrosocysteine (By similarity).…				1
P49753	AATLILEPAGR	YES	Acyl-coenzyme A thioesterase 2, mitochondrial	ACOT2;Acyl-coenzyme A thioesterase 2, mitochondrial;Acyl-coenzyme A thioester hydrolase 2a ;CTE-Ia ;Long-chain acyl-CoA thioesterase 2 ;ZAP128;ACOT2;S09.028	(Human)	14	GQIIRVPARM	AATLILEPAG	64	483					Subtiligase Based Positive Selection		TRANSIT (Mitochondrion (Potential).)	CHAIN (Acyl-coenzyme A thioesterase 2, mitochondrial.)	MOTIF (Microbody targeting signal (Potential).);MOD_RES (N6-acetyllysine (By similarity).);MOD_RES (N6-succinyllysine (By similarity).);ACT_SITE (Charge relay system (By similarity).)				63
P51398	SIAAHLDNQVPVESPR	YES	28S ribosomal protein S29, mitochondrial	DAP3;28S ribosomal protein S29, mitochondrial;Death-associated protein 3 Short=DAP-3 ;Ionizing radiation resistance conferring protein;RT29;	(Human)	1	FLHMGTQARQ	SIAAHLDNQV	31	398					Subtiligase Based Positive Selection;unknown		TRANSIT (Mitochondrion (Probable).)	CHAIN (28S ribosomal protein S29, mitochondrial.)	MOD_RES (N6-acetyllysine.)				12
P51659	ISDEDWDIIHR	YES	Peroxisomal multifunctional enzyme type 2	HSD17B4;Peroxisomal multifunctional enzyme type 2;17-beta-hydroxysteroid dehydrogenase 4 Short=17-beta-HSD 4 ;D-bifunctional protein Short=DBP ;Multifunctional protein 2 Short=MPF-2;DHB4;	(Human)	5	GILRDRSFAR	ISDEDWDIIH	111	736							MOD_RES (N6-acetyllysine; alternate (By similarity).);MOD_RES (N6-succinyllysine; alternate (By similarity).);MOD_RES (N6-succinyllysine (By similarity).);NP_BIND (NAD (By similarity).);NP_BIND (NAD.);BINDING (NAD; via amide nitrogen.);BINDING (NAD.);BINDING (NAD; via carbonyl oxygen.);MUTAGEN (G->S: No dehydrogenase activity.)	CHAIN (Peroxisomal multifunctional enzyme type 2.);CHAIN ((3R)-hydroxyacyl-CoA dehydrogenase.);REGION ((3R)-hydroxyacyl-CoA dehydrogenase.)	CHAIN (Enoyl-CoA hydratase 2.);MOTIF (Microbody targeting signal (Potential).);MOD_RES (N6-succinyllysine (By similarity).);MOD_RES (Phosphoserine.);MOD_RES (N6-acetyllysine.);REGION (Enoyl-CoA hydratase 2.);REGION ((3R)-3-hydroxydecanoyl-CoA binding (By similarity).);NP_BIND (NAD.);BINDING (Substrate (By similarity).);BINDING ((3R)-3-hydroxydecanoyl-CoA (By similarity).);BINDING ((3R)-3-hydroxyd…
P51659	VLQQFADNDVSR	YES	Peroxisomal multifunctional enzyme type 2	HSD17B4;Peroxisomal multifunctional enzyme type 2;17-beta-hydroxysteroid dehydrogenase 4 Short=17-beta-HSD 4 ;D-bifunctional protein Short=DBP ;Multifunctional protein 2 Short=MPF-2;DHB4;	(Human)	5	LCTFGFSARR	VLQQFADNDV	544	736							CHAIN ((3R)-hydroxyacyl-CoA dehydrogenase.);MOD_RES (N6-acetyllysine; alternate (By similarity).);MOD_RES (N6-succinyllysine; alternate (By similarity).);MOD_RES (N6-succinyllysine (By similarity).);MOD_RES (Phosphoserine.);REGION ((3R)-hydroxyacyl-CoA dehydrogenase.);REGION ((3R)-3-hydroxydecanoyl-CoA binding (By similarity).);NP_BIND (NAD (By similarity).);NP_BIND (NAD.);BINDING (NAD; via amide…	CHAIN (Peroxisomal multifunctional enzyme type 2.);CHAIN (Enoyl-CoA hydratase 2.);REGION (Enoyl-CoA hydratase 2.);DOMAIN (MaoC-like.)	MOTIF (Microbody targeting signal (Potential).);MOD_RES (N6-acetyllysine.);MOD_RES (N6-succinyllysine (By similarity).);BINDING ((3R)-3-hydroxydecanoyl-CoA; via carbonyl oxygen (By similarity).);BINDING (Substrate.);DOMAIN (SCP2.)
P54098	SSSVPASDPSDGQR	YES	DNA polymerase subunit gamma-1	POLG;DNA polymerase subunit gamma-1;Mitochondrial DNA polymerase catalytic subunit ;PolG-alpha;DPOG1;	(Human)	15	GPVPAPGRWV	SSSVPASDPS	27	1239					Subtiligase Based Positive Selection;unknown			CHAIN (DNA polymerase subunit gamma-1.)	COMPBIAS (Poly-Gln.);COMPBIAS (Poly-Glu.)
P54098	VSSSVPASDPSDGQR	YES	DNA polymerase subunit gamma-1	POLG;DNA polymerase subunit gamma-1;Mitochondrial DNA polymerase catalytic subunit ;PolG-alpha;DPOG1;	(Human)	15	PGPVPAPGRW	VSSSVPASDP	26	1239					Subtiligase Based Positive Selection;unknown			CHAIN (DNA polymerase subunit gamma-1.)	COMPBIAS (Poly-Gln.);COMPBIAS (Poly-Glu.)
P54886	QIAASSQDSVGR	YES	Delta-1-pyrroline-5-carboxylate synthase	ALDH18A1;Delta-1-pyrroline-5-carboxylate synthase;Aldehyde dehydrogenase family 18 member A1 Includes: RecName: Full=Glutamate 5-kinase Short=GK EC=2.7.2.11 ;Gamma-glutamyl kinase Includes: RecName: Full=Gamma-glutamyl phosphate reductase Short=GPR EC=1.2.1.41 ;Glutamate-5-semialdehyde dehydrogenase ;Glutamyl-gamma-semialdehyde dehydrogenase;P5CS;	(Human)	10	KLNSLAIGLR	QIAASSQDSV	442	795							MOD_RES (N6-succinyllysine (By similarity).);NP_BIND (ATP (By similarity).);REGION (Glutamate 5-kinase.);BINDING (Substrate (By similarity).);BINDING (Substrate; via amide nitrogen (By similarity).)	REGION (Gamma-glutamyl phosphate reductase.);CHAIN (Delta-1-pyrroline-5-carboxylate synthase.)	MOD_RES (N6-succinyllysine (By similarity).)
P54886	SNIPFITVPLSR	YES	Delta-1-pyrroline-5-carboxylate synthase	ALDH18A1;Delta-1-pyrroline-5-carboxylate synthase;Aldehyde dehydrogenase family 18 member A1 Includes: RecName: Full=Glutamate 5-kinase Short=GK EC=2.7.2.11 ;Gamma-glutamyl kinase Includes: RecName: Full=Gamma-glutamyl phosphate reductase Short=GPR EC=1.2.1.41 ;Glutamate-5-semialdehyde dehydrogenase ;Glutamyl-gamma-semialdehyde dehydrogenase;P5CS;	(Human)	10	PSVIRHVRSW	SNIPFITVPL	44	795					Subtiligase Based Positive Selection;unknown			REGION (Glutamate 5-kinase.);CHAIN (Delta-1-pyrroline-5-carboxylate synthase.)	MOD_RES (N6-succinyllysine (By similarity).);NP_BIND (ATP (By similarity).);REGION (Gamma-glutamyl phosphate reductase.);BINDING (Substrate (By similarity).);BINDING (Substrate; via amide nitrogen (By similarity).)
P55084	LAAAFAVSR	YES	Trifunctional enzyme subunit beta, mitochondrial	HADHB;Trifunctional enzyme subunit beta, mitochondrial;TP-beta Includes: RecName: Full=3-ketoacyl-CoA thiolase EC=2.3.1.16 ;Acetyl-CoA acyltransferase ;Beta-ketothiolase;ECHB;	(Human)	2	SETMGHSADR	LAAAFAVSRL	230	474							MOD_RES (N6-acetyllysine; alternate.);MOD_RES (N6-succinyllysine; alternate (By similarity).);MOD_RES (N6-succinyllysine (By similarity).);TRANSIT (Mitochondrion.);ACT_SITE (Acyl-thioester intermediate (By similarity).)	CHAIN (Trifunctional enzyme subunit beta, mitochondrial.)	MOD_RES (N6-succinyllysine (By similarity).);MOD_RES (N6-acetyllysine; alternate (By similarity).);MOD_RES (N6-succinyllysine; alternate (By similarity).);MOD_RES (N6-acetyllysine (By similarity).);ACT_SITE (Proton acceptor (By similarity).)				196
P55084	LVMAAANR	YES	Trifunctional enzyme subunit beta, mitochondrial	HADHB;Trifunctional enzyme subunit beta, mitochondrial;TP-beta Includes: RecName: Full=3-ketoacyl-CoA thiolase EC=2.3.1.16 ;Acetyl-CoA acyltransferase ;Beta-ketothiolase;ECHB;	(Human)	2	GHPFGATGCR	LVMAAANRLR	437	474							MOD_RES (N6-acetyllysine; alternate.);MOD_RES (N6-succinyllysine; alternate (By similarity).);MOD_RES (N6-succinyllysine (By similarity).);MOD_RES (N6-acetyllysine; alternate (By similarity).);MOD_RES (N6-acetyllysine (By similarity).);TRANSIT (Mitochondrion.);ACT_SITE (Acyl-thioester intermediate (By similarity).);ACT_SITE (Proton acceptor (By similarity).)	CHAIN (Trifunctional enzyme subunit beta, mitochondrial.)	ACT_SITE (Proton acceptor (By similarity).)				403
P55084	NVVVVDGVR	YES	Trifunctional enzyme subunit beta, mitochondrial	HADHB;Trifunctional enzyme subunit beta, mitochondrial;TP-beta Includes: RecName: Full=3-ketoacyl-CoA thiolase EC=2.3.1.16 ;Acetyl-CoA acyltransferase ;Beta-ketothiolase;ECHB;	(Human)	2	KKTLAKPNIR	NVVVVDGVRT	53	474							TRANSIT (Mitochondrion.)	CHAIN (Trifunctional enzyme subunit beta, mitochondrial.)	MOD_RES (N6-acetyllysine; alternate.);MOD_RES (N6-succinyllysine; alternate (By similarity).);MOD_RES (N6-succinyllysine (By similarity).);MOD_RES (N6-acetyllysine; alternate (By similarity).);MOD_RES (N6-acetyllysine (By similarity).);ACT_SITE (Acyl-thioester intermediate (By similarity).);ACT_SITE (Proton acceptor (By similarity).)				19
P55809	AGNVIFR	YES	Succinyl-CoA:3-ketoacid coenzyme A transferase 1, mitochondrial	OXCT1;Succinyl-CoA:3-ketoacid coenzyme A transferase 1, mitochondrial;3-oxoacid CoA-transferase 1 ;Somatic-type succinyl-CoA:3-oxoacid CoA-transferase Short=SCOT-s;SCOT1;	(Human)	5	ALVKAWKADR	AGNVIFRKSA	218	520							MOD_RES (Phosphoserine.);MOD_RES (N6-succinyllysine (By similarity).);TRANSIT (Mitochondrion.)	CHAIN (Succinyl-CoA:3-ketoacid coenzyme A transferase 1, mitochondrial.)	MOD_RES (N6-succinyllysine (By similarity).);ACT_SITE (5-glutamyl coenzyme A thioester intermediate (By similarity).)				178
P55809	KEGDGEAKSAKPGDDVR	YES	Succinyl-CoA:3-ketoacid coenzyme A transferase 1, mitochondrial	OXCT1;Succinyl-CoA:3-ketoacid coenzyme A transferase 1, mitochondrial;3-oxoacid CoA-transferase 1 ;Somatic-type succinyl-CoA:3-oxoacid CoA-transferase Short=SCOT-s;SCOT1;	(Human)	5	EKRIERLSIR	KEGDGEAKSA	286	520							MOD_RES (Phosphoserine.);MOD_RES (N6-succinyllysine (By similarity).);TRANSIT (Mitochondrion.)	CHAIN (Succinyl-CoA:3-ketoacid coenzyme A transferase 1, mitochondrial.)	MOD_RES (N6-succinyllysine (By similarity).);ACT_SITE (5-glutamyl coenzyme A thioester intermediate (By similarity).)				246
P61604	DGDILGKYVD	YES	10 kDa heat shock protein, mitochondrial	HSPE1;10 kDa heat shock protein, mitochondrial;10 kDa chaperonin ;Chaperonin 10 Short=CPN10 ;Early-pregnancy factor Short=EPF;CH10;	(Human)	2	LDDKDYFLFR	DGDILGKYVD	93	102							INIT_MET (Removed.);MOD_RES (N-acetylalanine.);MOD_RES (N6-acetyllysine (By similarity).);MOD_RES (N6-succinyllysine (By similarity).);MOD_RES (N6-acetyllysine; alternate (By similarity).);MOD_RES (N6-malonyllysine; alternate.);MOD_RES (N6-succinyllysine; alternate (By similarity).);MOD_RES (N6-acetyllysine; alternate.);MOD_RES (Phosphothreonine.)	CHAIN (10 kDa heat shock protein, mitochondrial.)	MOD_RES (N6-acetyllysine.)
P62263	DESSPYAAMLAAQDVAQR	YES	40S ribosomal protein S14	RPS14;40S ribosomal protein S14;RS14;	(Human)	5	TGGMKVKADR	DESSPYAAML	67	151				GRAB			INIT_MET (Removed.)	CHAIN (40S ribosomal protein S14.)	MOD_RES (Phosphothreonine.)
P62263	IEDVTPIPSDSTR	YES	40S ribosomal protein S14	RPS14;40S ribosomal protein S14;RS14;	(Human)	5	LARSGMKIGR	IEDVTPIPSD	129	151				MEP1B			INIT_MET (Removed.)	CHAIN (40S ribosomal protein S14.)	MOD_RES (Phosphothreonine.)
P62263	TKTPGPGAQSALR	YES	40S ribosomal protein S14	RPS14;40S ribosomal protein S14;RS14;	(Human)	5	IKLRATGGNR	TKTPGPGAQS	105	151					Subtiligase Based Positive Selection		INIT_MET (Removed.)	CHAIN (40S ribosomal protein S14.)	MOD_RES (Phosphothreonine.)
P62269	AGELTEDEVER	YES	40S ribosomal protein S18	RPS18;40S ribosomal protein S18;Ke-3 Short=Ke3;RS18;	(Human)	6	RKADIDLTKR	AGELTEDEVE	56	152				GRAA			MOD_RES (N-acetylserine.);INIT_MET (Removed.)	CHAIN (40S ribosomal protein S18.)	MOD_RES (N6-acetyllysine.)
P62269	KADIDLTKR	YES	40S ribosomal protein S18	RPS18;40S ribosomal protein S18;Ke-3 Short=Ke3;RS18;	(Human)	6	GRRYAHVVLR	KADIDLTKRA	47	152				GRAA	unknown		MOD_RES (N-acetylserine.);INIT_MET (Removed.)	CHAIN (40S ribosomal protein S18.)	MOD_RES (N6-acetyllysine.)
P62269	VITIMQNPR	YES	40S ribosomal protein S18	RPS18;40S ribosomal protein S18;Ke-3 Short=Ke3;RS18;	(Human)	6	GELTEDEVER	VITIMQNPRQ	67	152							MOD_RES (N-acetylserine.);INIT_MET (Removed.)	CHAIN (40S ribosomal protein S18.)	MOD_RES (N6-acetyllysine.)
P62269	VLNTNIDGR	YES	40S ribosomal protein S18	RPS18;40S ribosomal protein S18;Ke-3 Short=Ke3;RS18;	(Human)	6	IPEKFQHILR	VLNTNIDGRR	15	152							MOD_RES (N-acetylserine.);INIT_MET (Removed.)	CHAIN (40S ribosomal protein S18.)	MOD_RES (N6-acetyllysine.)
P62906	LASESLIKQIPR	YES	60S ribosomal protein L10a	RPL10A;60S ribosomal protein L10a;CSA-19 ;Neural precursor cell expressed developmentally down-regulated protein 6 Short=NEDD-6;RL10A;	(Human)	6	KKLAKKYDAF	LASESLIKQI	111	217							MOD_RES (N-acetylserine (Probable).);MOD_RES (Phosphotyrosine (By similarity).);MOD_RES (N6-acetyllysine (By similarity).);MOD_RES (N6-acetyllysine.);INIT_MET (Removed.)	CHAIN (60S ribosomal protein L10a.)	MOD_RES (N6-acetyllysine.)
P82673	STAVYSATPVPTPSLPER	YES	28S ribosomal protein S35, mitochondrial	MRPS35;28S ribosomal protein S35, mitochondrial;28S ribosomal protein S28, mitochondrial Short=MRP-S28 Short=S28mt;RT35;	(Human)	12	QSRARTLRAF	STAVYSATPV	23	323					Subtiligase Based Positive Selection;unknown		TRANSIT (Mitochondrion (Potential).)	CHAIN (28S ribosomal protein S35, mitochondrial.)	COILED (Potential.)				22
P82675	EECGPLPIVVASPR	YES	28S ribosomal protein S5, mitochondrial	MRPS5;28S ribosomal protein S5, mitochondrial;RT05;	(Human)	2	KKGLHVVEIR	EECGPLPIVV	375	430							DOMAIN (S5 DRBM.)	CHAIN (28S ribosomal protein S5, mitochondrial.)
Q00325	IQTQPGYANTLR	YES	Phosphate carrier protein, mitochondrial	SLC25A3;Phosphate carrier protein, mitochondrial;Phosphate transport protein Short=PTP ;Solute carrier family 25 member 3;MPCP;	(Human)	12	LAPMEAAKVR	IQTQPGYANT	190	362							TOPO_DOM (Mitochondrial intermembrane (Potential).);TOPO_DOM (Mitochondrial matrix (Potential).);TRANSMEM (Helical; Name=1; (Potential).);TRANSMEM (Helical; Name=2; (Potential).);TRANSMEM (Helical; Name=3; (Potential).);MOD_RES (N6-acetyllysine.);REPEAT (Solcar 1.);TRANSIT (Mitochondrion (By similarity).)	TOPO_DOM (Mitochondrial matrix (Potential).);CHAIN (Phosphate carrier protein, mitochondrial.);REPEAT (Solcar 2.)	TOPO_DOM (Mitochondrial intermembrane (Potential).);TOPO_DOM (Mitochondrial matrix (Potential).);TRANSMEM (Helical; Name=4; (Potential).);TRANSMEM (Helical; Name=5; (Potential).);TRANSMEM (Helical; Name=6; (Potential).);MOD_RES (Phosphotyrosine.);MOD_RES (N6-acetyllysine (By similarity).);REPEAT (Solcar 3.)			103	140
Q00325	SVTLKEDGVR	YES	Phosphate carrier protein, mitochondrial	SLC25A3;Phosphate carrier protein, mitochondrial;Phosphate transport protein Short=PTP ;Solute carrier family 25 member 3;MPCP;	(Human)	12	QKYKGIFNGF	SVTLKEDGVR	108	362							TOPO_DOM (Mitochondrial intermembrane (Potential).);TRANSMEM (Helical; Name=1; (Potential).);MOD_RES (N6-acetyllysine.);TRANSIT (Mitochondrion (By similarity).)	TOPO_DOM (Mitochondrial matrix (Potential).);CHAIN (Phosphate carrier protein, mitochondrial.);REPEAT (Solcar 1.)	TOPO_DOM (Mitochondrial intermembrane (Potential).);TOPO_DOM (Mitochondrial matrix (Potential).);TRANSMEM (Helical; Name=2; (Potential).);TRANSMEM (Helical; Name=3; (Potential).);TRANSMEM (Helical; Name=4; (Potential).);TRANSMEM (Helical; Name=5; (Potential).);TRANSMEM (Helical; Name=6; (Potential).);MOD_RES (Phosphotyrosine.);MOD_RES (N6-acetyllysine (By similarity).);REPEAT (Solcar 2.);REPEAT (…			21	58
Q02218	DMVGQVAITR	YES	2-oxoglutarate dehydrogenase, mitochondrial	OGDH;2-oxoglutarate dehydrogenase, mitochondrial;2-oxoglutarate dehydrogenase complex component E1 Short=OGDC-E1 ;Alpha-ketoglutarate dehydrogenase;ODO1;	(Human)	7	YDLTRERKAR	DMVGQVAITR	920	1023							METAL (Calcium.);MOD_RES (N6-succinyllysine (By similarity).);MOD_RES (N6-acetyllysine (By similarity).);TRANSIT (Mitochondrion.);CROSSLNK (Glycyl lysine isopeptide (Lys-Gly) (interchain with G-Cter in ubiquitin).);MUTAGEN (D->A: Six-fold decrease in sensitivity for calcium.);CA_BIND ()	CHAIN (2-oxoglutarate dehydrogenase, mitochondrial.)	MOD_RES (N6-acetyllysine.)				879
Q04837	DVAYQY	YES	Single-stranded DNA-binding protein, mitochondrial	SSBP1;Single-stranded DNA-binding protein, mitochondrial;PWP1-interacting protein 17;SSBP;	(Human)	7	RISVFRPGLR	DVAYQYVKKG	96	148							MOD_RES (Phosphoserine.);TRANSIT (Mitochondrion.)	DOMAIN (SSB.);CHAIN (Single-stranded DNA-binding protein, mitochondrial.)	MOD_RES (N6-acetyllysine.);MOD_RES (N6-succinyllysine (By similarity).)				79
Q04837	DVAYQYVKKGSR	YES	Single-stranded DNA-binding protein, mitochondrial	SSBP1;Single-stranded DNA-binding protein, mitochondrial;PWP1-interacting protein 17;SSBP;	(Human)	7	RISVFRPGLR	DVAYQYVKKG	96	148							MOD_RES (Phosphoserine.);TRANSIT (Mitochondrion.)	DOMAIN (SSB.);CHAIN (Single-stranded DNA-binding protein, mitochondrial.)	MOD_RES (N6-acetyllysine.);MOD_RES (N6-succinyllysine (By similarity).)				79
Q04837	ESETTTSLVLER	YES	Single-stranded DNA-binding protein, mitochondrial	SSBP1;Single-stranded DNA-binding protein, mitochondrial;PWP1-interacting protein 17;SSBP;	(Human)	7	LQVLRQFVRH	ESETTTSLVL	17	148	X	X			Subtiligase Based Positive Selection		TRANSIT (Mitochondrion.)		MOD_RES (Phosphoserine.);MOD_RES (N6-acetyllysine.);MOD_RES (N6-succinyllysine (By similarity).);DOMAIN (SSB.);CHAIN (Single-stranded DNA-binding protein, mitochondrial.)				0
Q04837	QATTIIADNIIFLSDQTKEKE	YES	Single-stranded DNA-binding protein, mitochondrial	SSBP1;Single-stranded DNA-binding protein, mitochondrial;PWP1-interacting protein 17;SSBP;	(Human)	7	EYMDKNNVRR	QATTIIADNI	128	148							MOD_RES (Phosphoserine.);MOD_RES (N6-acetyllysine.);MOD_RES (N6-succinyllysine (By similarity).);TRANSIT (Mitochondrion.)	DOMAIN (SSB.);CHAIN (Single-stranded DNA-binding protein, mitochondrial.)					111
Q04837	SETTTSLVLER	YES	Single-stranded DNA-binding protein, mitochondrial	SSBP1;Single-stranded DNA-binding protein, mitochondrial;PWP1-interacting protein 17;SSBP;	(Human)	7	QVLRQFVRHE	SETTTSLVLE	18	148	X	X			Subtiligase Based Positive Selection		TRANSIT (Mitochondrion.)	CHAIN (Single-stranded DNA-binding protein, mitochondrial.)	MOD_RES (Phosphoserine.);MOD_RES (N6-acetyllysine.);MOD_RES (N6-succinyllysine (By similarity).);DOMAIN (SSB.)				1
Q04837	SGDSEVYQLGDVSQKTTW	YES	Single-stranded DNA-binding protein, mitochondrial	SSBP1;Single-stranded DNA-binding protein, mitochondrial;PWP1-interacting protein 17;SSBP;	(Human)	7	FSLATNEMWR	SGDSEVYQLG	67	148							TRANSIT (Mitochondrion.)	DOMAIN (SSB.);CHAIN (Single-stranded DNA-binding protein, mitochondrial.)	MOD_RES (Phosphoserine.);MOD_RES (N6-acetyllysine.);MOD_RES (N6-succinyllysine (By similarity).)				50
Q04837	VGQDPVLR	YES	Single-stranded DNA-binding protein, mitochondrial	SSBP1;Single-stranded DNA-binding protein, mitochondrial;PWP1-interacting protein 17;SSBP;	(Human)	7	SLNRVHLLGR	VGQDPVLRQV	39	148							TRANSIT (Mitochondrion.)	DOMAIN (SSB.);CHAIN (Single-stranded DNA-binding protein, mitochondrial.)	MOD_RES (Phosphoserine.);MOD_RES (N6-acetyllysine.);MOD_RES (N6-succinyllysine (By similarity).)				22
Q07021	LHTDGDKAFVDFLSDEIKEER	YES	Complement component 1 Q subcomponent-binding protein, mitochondrial	C1QBP;Complement component 1 Q subcomponent-binding protein, mitochondrial;ASF/SF2-associated protein p32 ;Glycoprotein gC1qBP Short=C1qBP ;Hyaluronan-binding protein 1 ;Mitochondrial matrix protein p32 ;gC1q-R protein ;p33;C1QBP;	(Human)	17	PCACGCGCGS	LHTDGDKAFV	74	282	X	X			Subtiligase Based Positive Selection;unknown		TRANSIT (Mitochondrion.)		MOD_RES (N6-acetyllysine.);MOD_RES (Phosphotyrosine.);MOD_RES (Phosphoserine.);CHAIN (Complement component 1 Q subcomponent- binding protein, mitochondrial.);MUTAGEN (G->D: Impairs HIV RNA splicing in mouse cells.);REGION (C1q binding.);REGION (Interation with MAVS.)				0
Q12931	AQLLQPTLEINPR	YES	Heat shock protein 75 kDa, mitochondrial	TRAP1;Heat shock protein 75 kDa, mitochondrial;TNFR-associated protein 1 ;Tumor necrosis factor type 1 receptor-associated protein Short=TRAP-1;TRAP1;	(Human)	16	QQLAKTQEER	AQLLQPTLEI	635	704							MOD_RES (Phosphoserine (By similarity).);MOD_RES (Phosphothreonine (By similarity).);MOD_RES (N6-acetyllysine (By similarity).);MOD_RES (N6-acetyllysine.);MOD_RES (Phosphothreonine.);TRANSIT (Mitochondrion (By similarity).);BINDING (ATP (By similarity).);BINDING (ATP; via amide nitrogen (By similarity).)	CHAIN (Heat shock protein 75 kDa, mitochondrial.)					575
Q12931	GVVDSEDIPLNLSR	YES	Heat shock protein 75 kDa, mitochondrial	TRAP1;Heat shock protein 75 kDa, mitochondrial;TNFR-associated protein 1 ;Tumor necrosis factor type 1 receptor-associated protein Short=TRAP-1;TRAP1;	(Human)	16	ILPKWLRFIR	GVVDSEDIPL	389	704					Subtiligase Based Positive Selection		MOD_RES (Phosphoserine (By similarity).);MOD_RES (Phosphothreonine (By similarity).);MOD_RES (N6-acetyllysine (By similarity).);MOD_RES (N6-acetyllysine.);TRANSIT (Mitochondrion (By similarity).);BINDING (ATP (By similarity).);BINDING (ATP; via amide nitrogen (By similarity).)	CHAIN (Heat shock protein 75 kDa, mitochondrial.)	MOD_RES (N6-acetyllysine.);MOD_RES (N6-acetyllysine (By similarity).);MOD_RES (Phosphothreonine.);BINDING (ATP (By similarity).)				329
Q12931	LLHLR	YES	Heat shock protein 75 kDa, mitochondrial	TRAP1;Heat shock protein 75 kDa, mitochondrial;TNFR-associated protein 1 ;Tumor necrosis factor type 1 receptor-associated protein Short=TRAP-1;TRAP1;	(Human)	16	FCFEQFDELT	LLHLREFDKK	536	704							MOD_RES (Phosphoserine (By similarity).);MOD_RES (Phosphothreonine (By similarity).);MOD_RES (N6-acetyllysine (By similarity).);MOD_RES (N6-acetyllysine.);MOD_RES (Phosphothreonine.);TRANSIT (Mitochondrion (By similarity).);BINDING (ATP (By similarity).);BINDING (ATP; via amide nitrogen (By similarity).)	CHAIN (Heat shock protein 75 kDa, mitochondrial.)					476
Q12931	SLYSEKEVFIR	YES	Heat shock protein 75 kDa, mitochondrial	TRAP1;Heat shock protein 75 kDa, mitochondrial;TNFR-associated protein 1 ;Tumor necrosis factor type 1 receptor-associated protein Short=TRAP-1;TRAP1;	(Human)	16	TKKLLDIVAR	SLYSEKEVFI	104	704							TRANSIT (Mitochondrion (By similarity).)	CHAIN (Heat shock protein 75 kDa, mitochondrial.)	MOD_RES (Phosphoserine (By similarity).);MOD_RES (Phosphothreonine (By similarity).);MOD_RES (N6-acetyllysine (By similarity).);MOD_RES (N6-acetyllysine.);MOD_RES (Phosphothreonine.);BINDING (ATP (By similarity).);BINDING (ATP; via amide nitrogen (By similarity).)				44
Q12931	YESSALPSGQLTSLSEYASR	YES	Heat shock protein 75 kDa, mitochondrial	TRAP1;Heat shock protein 75 kDa, mitochondrial;TNFR-associated protein 1 ;Tumor necrosis factor type 1 receptor-associated protein Short=TRAP-1;TRAP1;	(Human)	16	VKEDIAKLLR	YESSALPSGQ	470	704							MOD_RES (Phosphoserine (By similarity).);MOD_RES (Phosphothreonine (By similarity).);MOD_RES (N6-acetyllysine (By similarity).);MOD_RES (N6-acetyllysine.);TRANSIT (Mitochondrion (By similarity).);BINDING (ATP (By similarity).);BINDING (ATP; via amide nitrogen (By similarity).)	CHAIN (Heat shock protein 75 kDa, mitochondrial.)	MOD_RES (Phosphothreonine.)				410
Q13011	EMVECFNKISR	YES	Delta(3,5)-Delta(2,4)-dienoyl-CoA isomerase, mitochondrial	ECH1;Delta(3,5)-Delta(2,4)-dienoyl-CoA isomerase, mitochondrial;ECH1;	(Human)	19	RNAMNKVFWR	EMVECFNKIS	88	328							TRANSIT (Mitochondrion (Potential).)	CHAIN (Delta(3,5)-Delta(2,4)-dienoyl-CoA isomerase, mitochondrial.)	MOTIF (Microbody targeting signal (Potential).);MOD_RES (N6-succinyllysine (By similarity).);MOD_RES (N6-acetyllysine.);BINDING (Substrate; via amide nitrogen (By similarity).);SITE (Important for catalytic activity (By similarity).)				54
Q13011	GSSAQEEASGVALGEAPDHSYESLR	YES	Delta(3,5)-Delta(2,4)-dienoyl-CoA isomerase, mitochondrial	ECH1;Delta(3,5)-Delta(2,4)-dienoyl-CoA isomerase, mitochondrial;ECH1;	(Human)	19	PGLSISLRLT	GSSAQEEASG	35	328	X	X			Subtiligase Based Positive Selection		TRANSIT (Mitochondrion (Potential).)	CHAIN (Delta(3,5)-Delta(2,4)-dienoyl-CoA isomerase, mitochondrial.)	MOTIF (Microbody targeting signal (Potential).);MOD_RES (N6-succinyllysine (By similarity).);MOD_RES (N6-acetyllysine.);BINDING (Substrate; via amide nitrogen (By similarity).);SITE (Important for catalytic activity (By similarity).)				1
Q13011	LTGSSAQEEASGVALGEAPDHSYESLR	YES	Delta(3,5)-Delta(2,4)-dienoyl-CoA isomerase, mitochondrial	ECH1;Delta(3,5)-Delta(2,4)-dienoyl-CoA isomerase, mitochondrial;ECH1;	(Human)	19	NYPGLSISLR	LTGSSAQEEA	33	328	X	X			Subtiligase Based Positive Selection			TRANSIT (Mitochondrion (Potential).)	CHAIN (Delta(3,5)-Delta(2,4)-dienoyl-CoA isomerase, mitochondrial.);MOTIF (Microbody targeting signal (Potential).);MOD_RES (N6-succinyllysine (By similarity).);MOD_RES (N6-acetyllysine.);BINDING (Substrate; via amide nitrogen (By similarity).);SITE (Important for catalytic activity (By similarity).)				-1
Q13011	TGSSAQEEASGVALGEAPDHSYESLR	YES	Delta(3,5)-Delta(2,4)-dienoyl-CoA isomerase, mitochondrial	ECH1;Delta(3,5)-Delta(2,4)-dienoyl-CoA isomerase, mitochondrial;ECH1;	(Human)	19	YPGLSISLRL	TGSSAQEEAS	34	328	X	X			Subtiligase Based Positive Selection		TRANSIT (Mitochondrion (Potential).)		CHAIN (Delta(3,5)-Delta(2,4)-dienoyl-CoA isomerase, mitochondrial.);MOTIF (Microbody targeting signal (Potential).);MOD_RES (N6-succinyllysine (By similarity).);MOD_RES (N6-acetyllysine.);BINDING (Substrate; via amide nitrogen (By similarity).);SITE (Important for catalytic activity (By similarity).)				0
Q13162	DETLR	YES	Peroxiredoxin-4	PRDX4;Peroxiredoxin-4;Antioxidant enzyme AOE372 Short=AOE37-2 ;Peroxiredoxin IV Short=Prx-IV ;Thioredoxin peroxidase AO372 ;Thioredoxin-dependent peroxide reductase A0372;PRDX4;	(Human)	X	LNDLPVGRSV	DETLRLVQAF	226	271							ACT_SITE (Cysteine sulfenic acid (-SOH) intermediate (By similarity).);DISULFID (Interchain (with C-245); in linked form (By similarity).);SIGNAL ()	DOMAIN (Thioredoxin.);CHAIN (Peroxiredoxin-4.)	DISULFID (Interchain (with C-124); in linked form (By similarity).)	188
Q13162	GLFIIDDKGILR	YES	Peroxiredoxin-4	PRDX4;Peroxiredoxin-4;Antioxidant enzyme AOE372 Short=AOE37-2 ;Peroxiredoxin IV Short=Prx-IV ;Thioredoxin peroxidase AO372 ;Thioredoxin-dependent peroxide reductase A0372;PRDX4;	(Human)	X	YLEDSGHTLR	GLFIIDDKGI	201	271							ACT_SITE (Cysteine sulfenic acid (-SOH) intermediate (By similarity).);DISULFID (Interchain (with C-245); in linked form (By similarity).);SIGNAL ()	DOMAIN (Thioredoxin.);CHAIN (Peroxiredoxin-4.)	DISULFID (Interchain (with C-124); in linked form (By similarity).)	163
Q13162	QGGLGPIR	YES	Peroxiredoxin-4	PRDX4;Peroxiredoxin-4;Antioxidant enzyme AOE372 Short=AOE37-2 ;Peroxiredoxin IV Short=Prx-IV ;Thioredoxin peroxidase AO372 ;Thioredoxin-dependent peroxide reductase A0372;PRDX4;	(Human)	X	HLAWINTPRR	QGGLGPIRIP	166	271							ACT_SITE (Cysteine sulfenic acid (-SOH) intermediate (By similarity).);DISULFID (Interchain (with C-245); in linked form (By similarity).);SIGNAL ()	DOMAIN (Thioredoxin.);CHAIN (Peroxiredoxin-4.)	DISULFID (Interchain (with C-124); in linked form (By similarity).)	128
Q13162	QITLNDLPVGR	YES	Peroxiredoxin-4	PRDX4;Peroxiredoxin-4;Antioxidant enzyme AOE372 Short=AOE37-2 ;Peroxiredoxin IV Short=Prx-IV ;Thioredoxin peroxidase AO372 ;Thioredoxin-dependent peroxide reductase A0372;PRDX4;	(Human)	X	FIIDDKGILR	QITLNDLPVG	213	271					unknown		ACT_SITE (Cysteine sulfenic acid (-SOH) intermediate (By similarity).);DISULFID (Interchain (with C-245); in linked form (By similarity).);SIGNAL ()	DOMAIN (Thioredoxin.);CHAIN (Peroxiredoxin-4.)	DISULFID (Interchain (with C-124); in linked form (By similarity).)	175
Q13162	SVDETLR	YES	Peroxiredoxin-4	PRDX4;Peroxiredoxin-4;Antioxidant enzyme AOE372 Short=AOE37-2 ;Peroxiredoxin IV Short=Prx-IV ;Thioredoxin peroxidase AO372 ;Thioredoxin-dependent peroxide reductase A0372;PRDX4;	(Human)	X	ITLNDLPVGR	SVDETLRLVQ	224	271							ACT_SITE (Cysteine sulfenic acid (-SOH) intermediate (By similarity).);DISULFID (Interchain (with C-245); in linked form (By similarity).);SIGNAL ()	DOMAIN (Thioredoxin.);CHAIN (Peroxiredoxin-4.)	DISULFID (Interchain (with C-124); in linked form (By similarity).)	186
Q13162	VQGWETEERPR	YES	Peroxiredoxin-4	PRDX4;Peroxiredoxin-4;Antioxidant enzyme AOE372 Short=AOE37-2 ;Peroxiredoxin IV Short=Prx-IV ;Thioredoxin peroxidase AO372 ;Thioredoxin-dependent peroxide reductase A0372;PRDX4;	(Human)	X	LLLFLLPAGA	VQGWETEERP	35	271	X	X			Subtiligase Based Positive Selection			SIGNAL ()	ACT_SITE (Cysteine sulfenic acid (-SOH) intermediate (By similarity).);DISULFID (Interchain (with C-245); in linked form (By similarity).);DISULFID (Interchain (with C-124); in linked form (By similarity).);DOMAIN (Thioredoxin.);CHAIN (Peroxiredoxin-4.)	-3
Q13162	WETEERPR	YES	Peroxiredoxin-4	PRDX4;Peroxiredoxin-4;Antioxidant enzyme AOE372 Short=AOE37-2 ;Peroxiredoxin IV Short=Prx-IV ;Thioredoxin peroxidase AO372 ;Thioredoxin-dependent peroxide reductase A0372;PRDX4;	(Human)	X	FLLPAGAVQG	WETEERPRTR	38	271	X	X			Subtiligase Based Positive Selection		SIGNAL ()		ACT_SITE (Cysteine sulfenic acid (-SOH) intermediate (By similarity).);DISULFID (Interchain (with C-245); in linked form (By similarity).);DISULFID (Interchain (with C-124); in linked form (By similarity).);DOMAIN (Thioredoxin.);CHAIN (Peroxiredoxin-4.)	0
Q13405	LSQTQGPPDYPR	YES	39S ribosomal protein L49, mitochondrial	MRPL49;39S ribosomal protein L49, mitochondrial;Neighbor of FAU Short=NOF ;Protein NOF1;RM49;	(Human)	11	GVQRGCGLRL	LSQTQGPPDY	26	166					Subtiligase Based Positive Selection;unknown			CHAIN (39S ribosomal protein L49, mitochondrial.)
Q13405	SQTQGPPDYPR	YES	39S ribosomal protein L49, mitochondrial	MRPL49;39S ribosomal protein L49, mitochondrial;Neighbor of FAU Short=NOF ;Protein NOF1;RM49;	(Human)	11	VQRGCGLRLL	SQTQGPPDYP	27	166					Subtiligase Based Positive Selection;unknown			CHAIN (39S ribosomal protein L49, mitochondrial.)
Q13637	FGNMTR	YES	Ras-related protein Rab-32	RAB32;Ras-related protein Rab-32;RAB32;	(Human)	6	QLWDIAGQER	FGNMTRVYYK	88	225							MOD_RES (N-acetylalanine.);INIT_MET (Removed.);NP_BIND (GTP (By similarity).);MOTIF (Effector region (By similarity).);MUTAGEN (T->N: Decreased GTP-binding activity.);MUTAGEN (Q->L: No change in GTPase activity.)	CHAIN (Ras-related protein Rab-32.)	NP_BIND (GTP (By similarity).);REGION (PKA-RII subunit binding domain.);MUTAGEN (A->F: Abolishes binding to protein kinase A type II regulatory subunit.);MUTAGEN (L->P: Abolishes binding to protein kinase A type II regulatory subunit.);LIPID (S-geranylgeranyl cysteine (By similarity).)
Q14249	AELPPVPGGPR	YES	Endonuclease G, mitochondrial	ENDOG;Endonuclease G, mitochondrial;NUCG;	(Human)	9	RLPVLPVAAA	AELPPVPGGP	49	297	X	X			Subtiligase Based Positive Selection		TRANSIT (Mitochondrion (By similarity).)		CHAIN (Endonuclease G, mitochondrial.);METAL (Magnesium or manganese; catalytic (By similarity).);ACT_SITE (Proton acceptor (By similarity).)				0
Q14257	AGKAEELHYPLGER	YES	Reticulocalbin-2	RCN2;Reticulocalbin-2;Calcium-binding protein ERC-55 ;E6-binding protein Short=E6BP;RCN2;	(Human)	15	LLLLCAAAAG	AGKAEELHYP	22	317	X	X			unknown;Subtiligase Based Positive Selection			SIGNAL (By similarity.)	DOMAIN (EF-hand 1.);DOMAIN (EF-hand 2.);DOMAIN (EF-hand 3.);DOMAIN (EF-hand 4.);DOMAIN (EF-hand 5.);DOMAIN (EF-hand 6.);MOTIF (Prevents secretion from ER (Potential).);CHAIN (Reticulocalbin-2.);CA_BIND (1 (Potential).);CA_BIND (2 (Potential).);CA_BIND (3; possibly ancestral (Potential).);CA_BIND (4 (Potential).);CA_BIND (5 (Potential).);CA_BIND (6 (Potential).)	-1
Q14257	EELHYPLGER	YES	Reticulocalbin-2	RCN2;Reticulocalbin-2;Calcium-binding protein ERC-55 ;E6-binding protein Short=E6BP;RCN2;	(Human)	15	CAAAAGAGKA	EELHYPLGER	26	317	X	X			unknown;Subtiligase Based Positive Selection		SIGNAL (By similarity.)	CHAIN (Reticulocalbin-2.)	DOMAIN (EF-hand 1.);DOMAIN (EF-hand 2.);DOMAIN (EF-hand 3.);DOMAIN (EF-hand 4.);DOMAIN (EF-hand 5.);DOMAIN (EF-hand 6.);MOTIF (Prevents secretion from ER (Potential).);CA_BIND (1 (Potential).);CA_BIND (2 (Potential).);CA_BIND (3; possibly ancestral (Potential).);CA_BIND (4 (Potential).);CA_BIND (5 (Potential).);CA_BIND (6 (Potential).)	3
Q14257	GKAEELHYPLGER	YES	Reticulocalbin-2	RCN2;Reticulocalbin-2;Calcium-binding protein ERC-55 ;E6-binding protein Short=E6BP;RCN2;	(Human)	15	LLLCAAAAGA	GKAEELHYPL	23	317	X	X			unknown;Subtiligase Based Positive Selection		SIGNAL (By similarity.)		DOMAIN (EF-hand 1.);DOMAIN (EF-hand 2.);DOMAIN (EF-hand 3.);DOMAIN (EF-hand 4.);DOMAIN (EF-hand 5.);DOMAIN (EF-hand 6.);MOTIF (Prevents secretion from ER (Potential).);CHAIN (Reticulocalbin-2.);CA_BIND (1 (Potential).);CA_BIND (2 (Potential).);CA_BIND (3; possibly ancestral (Potential).);CA_BIND (4 (Potential).);CA_BIND (5 (Potential).);CA_BIND (6 (Potential).)	0
Q16595	SGTLGHPGSLDETTYER	YES	Frataxin, mitochondrial	FXN;Frataxin, mitochondrial;Friedreich ataxia protein Short=Fxn;FRDA;	(Human)	9	QSVYLMNLRK	SGTLGHPGSL	81	210		X			unknown;Subtiligase Based Positive Selection		TRANSIT (Mitochondrion.);MUTAGEN (RR->GG: Abolishes cleavage to yield frataxin intermediate form and allows accumulation of frataxin(56-210) and frataxin(78-210).);MUTAGEN (RR->GG: No effect on processing of wild- type FXN.);MUTAGEN (LR->GG: Abolishes cleavage to yield frataxin mature form and allows accumulation of frataxin(56-210) and frataxin(78-210).);MUTAGEN (RK->GG: Abolishes cleavage to yi…	CHAIN (Frataxin intermediate form.);CHAIN (Frataxin(56-210).);CHAIN (Frataxin(78-210).)	CHAIN (Frataxin mature form.)				39
Q16795	LHHALMPHGKGGR	YES	NADH dehydrogenase [ubiquinone] 1 alpha subcomplex subunit 9, mitochondrial	NDUFA9;NADH dehydrogenase [ubiquinone] 1 alpha subcomplex subunit 9, mitochondrial;Complex I-39kD Short=CI-39kD ;NADH-ubiquinone oxidoreductase 39 kDa subunit;NDUA9;	(Human)	12	SVCHGPPCRQ	LHHALMPHGK	36	377	X	X					TRANSIT (Mitochondrion (By similarity).)		CHAIN (NADH dehydrogenase [ubiquinone] 1 alpha subcomplex subunit 9, mitochondrial.);MOD_RES (N6-succinyllysine (By similarity).);MOD_RES (N6-acetyllysine (By similarity).)				0
Q16891	ELDSITPEVLPGWKGM	YES	Mitochondrial inner membrane protein	IMMT;Mitochondrial inner membrane protein;Cell proliferation-inducing gene 4/52 protein ;Mitofilin ;p87/89;IMMT;	(Human)	2	VVQARDDFKR	ELDSITPEVL	372	758					Subtiligase Based Positive Selection		TOPO_DOM (Mitochondrial matrix (Potential).);TRANSMEM (Helical; (Potential).);MOD_RES (N6-acetyllysine.)	TOPO_DOM (Mitochondrial intermembrane (Potential).);CHAIN (Mitochondrial inner membrane protein.)	MOD_RES (N6-acetyllysine.)			307
Q16891	ERPPEEVAAR	YES	Mitochondrial inner membrane protein	IMMT;Mitochondrial inner membrane protein;Cell proliferation-inducing gene 4/52 protein ;Mitofilin ;p87/89;IMMT;	(Human)	2	SEEASSSSIR	ERPPEEVAAR	196	758							TOPO_DOM (Mitochondrial matrix (Potential).);TRANSMEM (Helical; (Potential).)	TOPO_DOM (Mitochondrial intermembrane (Potential).);CHAIN (Mitochondrial inner membrane protein.)	MOD_RES (N6-acetyllysine.)			131
Q16891	GVYSEETLR	YES	Mitochondrial inner membrane protein	IMMT;Mitochondrial inner membrane protein;Cell proliferation-inducing gene 4/52 protein ;Mitofilin ;p87/89;IMMT;	(Human)	2	AAIPPESLTR	GVYSEETLRA	624	758							TOPO_DOM (Mitochondrial matrix (Potential).);TRANSMEM (Helical; (Potential).);MOD_RES (N6-acetyllysine.)	TOPO_DOM (Mitochondrial intermembrane (Potential).);CHAIN (Mitochondrial inner membrane protein.)				559
Q16891	VAMIDETR	YES	Mitochondrial inner membrane protein	IMMT;Mitochondrial inner membrane protein;Cell proliferation-inducing gene 4/52 protein ;Mitofilin ;p87/89;IMMT;	(Human)	2	FYAVQKLARR	VAMIDETRNS	645	758							TOPO_DOM (Mitochondrial matrix (Potential).);TRANSMEM (Helical; (Potential).);MOD_RES (N6-acetyllysine.)	TOPO_DOM (Mitochondrial intermembrane (Potential).);CHAIN (Mitochondrial inner membrane protein.)				580
Q5JPH6	GTDAGVAVR	YES	Probable glutamate--tRNA ligase, mitochondrial	EARS2;Probable glutamate--tRNA ligase, mitochondrial;Glutamyl-tRNA synthetase Short=GluRS;SYEM;	(Human)	16	RPVGRREANL	GTDAGVAVRV	30	523					unknown;Subtiligase Based Positive Selection			TRANSIT (Mitochondrion (Potential).)	MOD_RES (N6-succinyllysine (By similarity).);MOD_RES (N6-acetyllysine.);NP_BIND (ATP (By similarity).);REGION (Glutamate binding (By similarity).);MOTIF ("HIGH" region.);MOTIF ("KMSKS" region.);CHAIN (Probable glutamate--tRNA ligase, mitochondrial.);BINDING (ATP (By similarity).);BINDING (Glutamate (By similarity).)				-12
Q5JTZ9	SHRPLSSEPPAAKASAVR	YES	Alanine--tRNA ligase, mitochondrial	AARS2;Alanine--tRNA ligase, mitochondrial;Alanyl-tRNA synthetase Short=AlaRS;SYAM;	(Human)	6	IRRSPAWRGL	SHRPLSSEPP	26	985	X	X			Subtiligase Based Positive Selection;unknown		TRANSIT (Mitochondrion (Potential).)	CHAIN (Alanine--tRNA ligase, mitochondrial.)	METAL (Zinc (Potential).)				2
Q5ST30	HSVSTQSEPHGSPISR	YES	Valine--tRNA ligase, mitochondrial	VARS2;Valine--tRNA ligase, mitochondrial;Valyl-tRNA synthetase Short=ValRS ;Valyl-tRNA synthetase-like;SYVM;	(Human)	6	LRHSRGLPRF	HSVSTQSEPH	26	1063	X	X			Subtiligase Based Positive Selection			TRANSIT (Mitochondrion (Potential).)	MOTIF ("HIGH" region.);MOTIF ("KMSKS" region.);CHAIN (Valine--tRNA ligase, mitochondrial.);BINDING (ATP (By similarity).)				-1
Q5ST30	SVSTQSEPHGSPISR	YES	Valine--tRNA ligase, mitochondrial	VARS2;Valine--tRNA ligase, mitochondrial;Valyl-tRNA synthetase Short=ValRS ;Valyl-tRNA synthetase-like;SYVM;	(Human)	6	RHSRGLPRFH	SVSTQSEPHG	27	1063	X	X			Subtiligase Based Positive Selection		TRANSIT (Mitochondrion (Potential).)		MOTIF ("HIGH" region.);MOTIF ("KMSKS" region.);CHAIN (Valine--tRNA ligase, mitochondrial.);BINDING (ATP (By similarity).)				0
Q5SXM8	SSSEQGPGPAAALGR	YES	DNL-type zinc finger protein	DNLZ;DNL-type zinc finger protein;Hsp70-escort protein 1 Short=HEP1 ;mtHsp70-escort protein;DNLZ;	(Human)	9	RRAWAWGWRR	SSSEQGPGPA	49	178	X	X			Subtiligase Based Positive Selection;unknown			TRANSIT (Mitochondrion (Potential).)	CHAIN (DNL-type zinc finger protein.);ZN_FING (DNL-type.)				-1
Q5T440	AHSSCSPGGDPTAGAAWACFR	YES	Putative transferase CAF17, mitochondrial	IBA57;Putative transferase CAF17, mitochondrial;Iron-sulfur cluster assembly factor homolog;CAF17;	(Human)	1	RLRAAPRCRL	AHSSCSPGGD	32	356								TRANSIT (Mitochondrion (Potential).)	MOD_RES (N6-acetyllysine; alternate (By similarity).);MOD_RES (N6-succinyllysine; alternate (By similarity).);CHAIN (Putative transferase CAF17, mitochondrial.)				-8
Q5T9A4	AQYQDKLAR	YES	ATPase family AAA domain-containing protein 3B	ATAD3B;ATPase family AAA domain-containing protein 3B;AAA-TOB3;ATD3B;	(Human)	1	SEETRQHQAR	AQYQDKLARQ	130	648							COMPBIAS (Poly-Pro.);INIT_MET (Removed.);MOD_RES (N-acetylserine.)	TOPO_DOM (Mitochondrial intermembrane (Potential).);CHAIN (ATPase family AAA domain-containing protein 3B.);COILED (Potential.)	NP_BIND (ATP (Potential).);TOPO_DOM (Mitochondrial intermembrane (Potential).);INTRAMEM (Helical; (Potential).);MOD_RES (N6-acetyllysine.)
Q5T9A4	ITVLEALR	YES	ATPase family AAA domain-containing protein 3B	ATAD3B;ATPase family AAA domain-containing protein 3B;AAA-TOB3;ATD3B;	(Human)	1	KPSLVRETSR	ITVLEALRHP	291	648							COMPBIAS (Poly-Pro.);TOPO_DOM (Mitochondrial intermembrane (Potential).);INTRAMEM (Helical; (Potential).);INIT_MET (Removed.);MOD_RES (N-acetylserine.);COILED (Potential.)	TOPO_DOM (Mitochondrial intermembrane (Potential).);CHAIN (ATPase family AAA domain-containing protein 3B.)	NP_BIND (ATP (Potential).);MOD_RES (N6-acetyllysine.)
Q5T9A4	KQEESVQKQEAMR	YES	ATPase family AAA domain-containing protein 3B	ATAD3B;ATPase family AAA domain-containing protein 3B;AAA-TOB3;ATD3B;	(Human)	1	QQLLNEENLR	KQEESVQKQE	158	648							COMPBIAS (Poly-Pro.);INIT_MET (Removed.);MOD_RES (N-acetylserine.)	TOPO_DOM (Mitochondrial intermembrane (Potential).);CHAIN (ATPase family AAA domain-containing protein 3B.);COILED (Potential.)	NP_BIND (ATP (Potential).);TOPO_DOM (Mitochondrial intermembrane (Potential).);INTRAMEM (Helical; (Potential).);MOD_RES (N6-acetyllysine.)
Q6JQN1	SSVPEASPAHTSR	YES	Acyl-CoA dehydrogenase family member 10	ACAD10;Acyl-CoA dehydrogenase family member 10;ACD10;	(Human)	12	QWCPTGSRSY	SSVPEASPAH	637	1059					unknown;Subtiligase Based Positive Selection		MOD_RES (N6-succinyllysine (By similarity).);MOD_RES (N6-acetyllysine; alternate (By similarity).);MOD_RES (N6-succinyllysine; alternate (By similarity).)	CHAIN (Acyl-CoA dehydrogenase family member 10.)	NP_BIND (FAD (By similarity).);MOD_RES (N6-acetyllysine; alternate (By similarity).);MOD_RES (N6-succinyllysine; alternate (By similarity).);BINDING (FAD (By similarity).)
Q6L8Q7	AGSQTAAGAMER	YES	2',5'-phosphodiesterase 12	PDE12;2',5'-phosphodiesterase 12;Mitochondrial deadenylase EC=3.1.13.4;PDE12;	(Human)	3	TAVEKLSRAE	AGSQTAAGAM	26	609							TRANSIT (Mitochondrion (Probable).)	CHAIN (2',5'-phosphodiesterase 12.)	MOD_RES (Phosphoserine.);ACT_SITE (By similarity.);METAL (Magnesium 1 (By similarity).);METAL (Magnesium 2 (By similarity).)				9
Q6NUK1	QLLAGGIAGAVSR	YES	Calcium-binding mitochondrial carrier protein SCaMC-1	SLC25A24;Calcium-binding mitochondrial carrier protein SCaMC-1;Mitochondrial ATP-Mg/Pi carrier protein 1 ;Mitochondrial Ca(2+)-dependent solute carrier protein 1 ;Small calcium-binding mitochondrial carrier protein 1 ;Solute carrier family 25 member 24;SCMC1;	(Human)	1	DEKKSGQWWR	QLLAGGIAGA	197	477							DOMAIN (EF-hand 1.);DOMAIN (EF-hand 2.);DOMAIN (EF-hand 3.);DOMAIN (EF-hand 4.);CA_BIND (1.);CA_BIND (2.);CA_BIND (3.);CA_BIND (4.)	CHAIN (Calcium-binding mitochondrial carrier protein SCaMC-1.);TOPO_DOM (Mitochondrial intermembrane (Potential).);REPEAT (Solcar 1.)	MOD_RES (N6-acetyllysine; alternate (By similarity).);MOD_RES (N6-succinyllysine; alternate (By similarity).);MOD_RES (N6-acetyllysine.);MOD_RES (N6-acetyllysine; alternate.);TOPO_DOM (Mitochondrial matrix (Potential).);TOPO_DOM (Mitochondrial intermembrane (Potential).);TRANSMEM (Helical; Name=1; (Potential).);TRANSMEM (Helical; Name=2; (Potential).);TRANSMEM (Helical; Name=3; (Potential).);TRAN…			-269
Q6NUK1	QMVKEGGIR	YES	Calcium-binding mitochondrial carrier protein SCaMC-1	SLC25A24;Calcium-binding mitochondrial carrier protein SCaMC-1;Mitochondrial ATP-Mg/Pi carrier protein 1 ;Mitochondrial Ca(2+)-dependent solute carrier protein 1 ;Small calcium-binding mitochondrial carrier protein 1 ;Solute carrier family 25 member 24;SCMC1;	(Human)	1	DKMNIFGGFR	QMVKEGGIRS	240	477							DOMAIN (EF-hand 1.);DOMAIN (EF-hand 2.);DOMAIN (EF-hand 3.);DOMAIN (EF-hand 4.);TOPO_DOM (Mitochondrial intermembrane (Potential).);TRANSMEM (Helical; Name=1; (Potential).);CA_BIND (1.);CA_BIND (2.);CA_BIND (3.);CA_BIND (4.)	CHAIN (Calcium-binding mitochondrial carrier protein SCaMC-1.);TOPO_DOM (Mitochondrial matrix (Potential).);REPEAT (Solcar 1.)	MOD_RES (N6-acetyllysine; alternate (By similarity).);MOD_RES (N6-succinyllysine; alternate (By similarity).);MOD_RES (N6-acetyllysine.);MOD_RES (N6-acetyllysine; alternate.);TOPO_DOM (Mitochondrial intermembrane (Potential).);TOPO_DOM (Mitochondrial matrix (Potential).);TRANSMEM (Helical; Name=2; (Potential).);TRANSMEM (Helical; Name=3; (Potential).);TRANSMEM (Helical; Name=4; (Potential).);TRAN…			-226
Q6PI78	EALNTAQGAR	YES	Transmembrane protein 65	TMEM65;Transmembrane protein 65;TMM65;	(Human)	8	LGTHPKKEPM	EALNTAQGAR	64	240								CHAIN (Transmembrane protein 65.)	TRANSMEM (Helical; (Potential).)			-167
Q6PI78	GTHPKKEPMEALNTAQGAR	YES	Transmembrane protein 65	TMEM65;Transmembrane protein 65;TMM65;	(Human)	8	GGLPGGPRRL	GTHPKKEPME	55	240								CHAIN (Transmembrane protein 65.)	TRANSMEM (Helical; (Potential).)			-176
Q6PI78	LGTHPKKEPMEALNTAQGAR	YES	Transmembrane protein 65	TMEM65;Transmembrane protein 65;TMM65;	(Human)	8	PGGLPGGPRR	LGTHPKKEPM	54	240								CHAIN (Transmembrane protein 65.)	TRANSMEM (Helical; (Potential).)			-177
Q6PML9	STNVQKEGQGSQTLR	YES	Zinc transporter 9	SLC30A9;Zinc transporter 9;Human embryonic lung protein Short=HuEL ;Solute carrier family 30 member 9;ZNT9;	(Human)	4	IGTLSQVKLY	STNVQKEGQG	68	568					Subtiligase Based Positive Selection;unknown			CHAIN (Zinc transporter 9.)	MOTIF (LXXLL motif.);TRANSMEM (Helical; (Potential).)			-377
Q6UB35	DFILPISDVR	YES	Monofunctional C1-tetrahydrofolate synthase, mitochondrial	MTHFD1L;Monofunctional C1-tetrahydrofolate synthase, mitochondrial;Formyltetrahydrofolate synthetase;C1TM;	(Human)	6	HQPDKKGVPR	DFILPISDVR	926	978							COMPBIAS (Poly-Gly.);NP_BIND (ATP (By similarity).);MOD_RES (N6-acetyllysine; alternate.);MOD_RES (N6-succinyllysine; alternate (By similarity).);MOD_RES (N6-succinyllysine (By similarity).);TRANSIT (Mitochondrion.);REGION (Methylenetetrahydrofolate dehydrogenase and cyclohydrolase.)	CHAIN (Monofunctional C1-tetrahydrofolate synthase, mitochondrial.);REGION (Formyltetrahydrofolate synthetase.)					894
Q7KZF4	ADDADEFGYSR	YES	Staphylococcal nuclease domain-containing protein 1	SND1;Staphylococcal nuclease domain-containing protein 1;100 kDa coactivator ;EBNA2 coactivator p100 ;Tudor domain-containing protein 11 ;p100 co-activator;SND1;	(Human)	7	LNLWRYGDFR	ADDADEFGYS	900	910							MOD_RES (N-acetylalanine.);MOD_RES (N6-acetyllysine.);MOD_RES (Phosphoserine.);INIT_MET (Removed.);DOMAIN (TNase-like 1.);DOMAIN (TNase-like 2.);DOMAIN (TNase-like 3.);DOMAIN (TNase-like 4.);DOMAIN (Tudor.);MOTIF (Nuclear localization signal (Potential).)	CHAIN (Staphylococcal nuclease domain-containing protein 1.)	MOD_RES (Phosphoserine.)
Q7KZF4	EVLPSTR	YES	Staphylococcal nuclease domain-containing protein 1	SND1;Staphylococcal nuclease domain-containing protein 1;100 kDa coactivator ;EBNA2 coactivator p100 ;Tudor domain-containing protein 11 ;p100 co-activator;SND1;	(Human)	7	HVFYIDYGNR	EVLPSTRLGT	770	910							MOD_RES (N-acetylalanine.);MOD_RES (N6-acetyllysine.);INIT_MET (Removed.);DOMAIN (TNase-like 1.);DOMAIN (TNase-like 2.);DOMAIN (TNase-like 3.);DOMAIN (TNase-like 4.);MOTIF (Nuclear localization signal (Potential).)	DOMAIN (Tudor.);CHAIN (Staphylococcal nuclease domain-containing protein 1.)	MOD_RES (Phosphoserine.)
Q7KZF4	PASPATETVPAFSER	YES	Staphylococcal nuclease domain-containing protein 1	SND1;Staphylococcal nuclease domain-containing protein 1;100 kDa coactivator ;EBNA2 coactivator p100 ;Tudor domain-containing protein 11 ;p100 co-activator;SND1;	(Human)	7	KVNVTVDYIR	PASPATETVP	424	910							MOD_RES (N-acetylalanine.);MOD_RES (N6-acetyllysine.);INIT_MET (Removed.);DOMAIN (TNase-like 1.);DOMAIN (TNase-like 2.);MOTIF (Nuclear localization signal (Potential).)	DOMAIN (TNase-like 3.);CHAIN (Staphylococcal nuclease domain-containing protein 1.)	MOD_RES (N6-acetyllysine.);MOD_RES (Phosphoserine.);DOMAIN (TNase-like 4.);DOMAIN (Tudor.)
Q7KZF4	QINLSNIR	YES	Staphylococcal nuclease domain-containing protein 1	SND1;Staphylococcal nuclease domain-containing protein 1;100 kDa coactivator ;EBNA2 coactivator p100 ;Tudor domain-containing protein 11 ;p100 co-activator;SND1;	(Human)	7	QPRGGPPPER	QINLSNIRAG	48	910							MOD_RES (N-acetylalanine.);INIT_MET (Removed.)	DOMAIN (TNase-like 1.);CHAIN (Staphylococcal nuclease domain-containing protein 1.)	MOD_RES (N6-acetyllysine.);MOD_RES (Phosphoserine.);DOMAIN (TNase-like 2.);DOMAIN (TNase-like 3.);DOMAIN (TNase-like 4.);DOMAIN (Tudor.);MOTIF (Nuclear localization signal (Potential).)
Q7KZF4	SEAVVEYVFSGSR	YES	Staphylococcal nuclease domain-containing protein 1	SND1;Staphylococcal nuclease domain-containing protein 1;100 kDa coactivator ;EBNA2 coactivator p100 ;Tudor domain-containing protein 11 ;p100 co-activator;SND1;	(Human)	7	FLPFLQRAGR	SEAVVEYVFS	527	910							MOD_RES (N-acetylalanine.);MOD_RES (N6-acetyllysine.);INIT_MET (Removed.);DOMAIN (TNase-like 1.);DOMAIN (TNase-like 2.);DOMAIN (TNase-like 3.);MOTIF (Nuclear localization signal (Potential).)	DOMAIN (TNase-like 4.);CHAIN (Staphylococcal nuclease domain-containing protein 1.)	MOD_RES (N6-acetyllysine.);MOD_RES (Phosphoserine.);DOMAIN (Tudor.)
Q7KZF4	SSHYDELLAAEAR	YES	Staphylococcal nuclease domain-containing protein 1	SND1;Staphylococcal nuclease domain-containing protein 1;100 kDa coactivator ;EBNA2 coactivator p100 ;Tudor domain-containing protein 11 ;p100 co-activator;SND1;	(Human)	7	IRYRQDDDQR	SSHYDELLAA	473	910							MOD_RES (N-acetylalanine.);MOD_RES (N6-acetyllysine.);INIT_MET (Removed.);DOMAIN (TNase-like 1.);DOMAIN (TNase-like 2.);MOTIF (Nuclear localization signal (Potential).)	DOMAIN (TNase-like 3.);CHAIN (Staphylococcal nuclease domain-containing protein 1.)	MOD_RES (N6-acetyllysine.);MOD_RES (Phosphoserine.);DOMAIN (TNase-like 4.);DOMAIN (Tudor.)
Q7KZF4	TDAVDSVVR	YES	Staphylococcal nuclease domain-containing protein 1	SND1;Staphylococcal nuclease domain-containing protein 1;100 kDa coactivator ;EBNA2 coactivator p100 ;Tudor domain-containing protein 11 ;p100 co-activator;SND1;	(Human)	7	IQVPQDDDAR	TDAVDSVVRD	811	910							MOD_RES (N-acetylalanine.);MOD_RES (N6-acetyllysine.);MOD_RES (Phosphoserine.);INIT_MET (Removed.);DOMAIN (TNase-like 1.);DOMAIN (TNase-like 2.);DOMAIN (TNase-like 3.);DOMAIN (TNase-like 4.);DOMAIN (Tudor.);MOTIF (Nuclear localization signal (Potential).)	CHAIN (Staphylococcal nuclease domain-containing protein 1.)	MOD_RES (Phosphoserine.)
Q7KZF4	VADISGDTQKAK	YES	Staphylococcal nuclease domain-containing protein 1	SND1;Staphylococcal nuclease domain-containing protein 1;100 kDa coactivator ;EBNA2 coactivator p100 ;Tudor domain-containing protein 11 ;p100 co-activator;SND1;	(Human)	7	HSKKEVPIHR	VADISGDTQK	504	910							MOD_RES (N-acetylalanine.);MOD_RES (N6-acetyllysine.);INIT_MET (Removed.);DOMAIN (TNase-like 1.);DOMAIN (TNase-like 2.);DOMAIN (TNase-like 3.);MOTIF (Nuclear localization signal (Potential).)	CHAIN (Staphylococcal nuclease domain-containing protein 1.)	MOD_RES (N6-acetyllysine.);MOD_RES (Phosphoserine.);DOMAIN (TNase-like 4.);DOMAIN (Tudor.)
Q7KZN9	STISEVALQSGR	YES	Cytochrome c oxidase assembly protein COX15 homolog	COX15;Cytochrome c oxidase assembly protein COX15 homolog;COX15;	(Human)	10	IRRPLRPGQY	STISEVALQS	44	410					unknown;Subtiligase Based Positive Selection			CHAIN (Cytochrome c oxidase assembly protein COX15 homolog.)	TRANSMEM (Helical; (Potential).)			-45
Q7L2E3	ISAVSVAQR	YES	Putative ATP-dependent RNA helicase DHX30	DHX30;Putative ATP-dependent RNA helicase DHX30;DEAH box protein 30;DHX30;	(Human)	3	CNVIITQPRR	ISAVSVAQRV	494	1194							COMPBIAS (Poly-Glu.);NP_BIND (ATP (By similarity).);DOMAIN (DRBM.)	CHAIN (Putative ATP-dependent RNA helicase DHX30.);DOMAIN (Helicase ATP-binding.)	MOTIF (DEAH box.);DOMAIN (Helicase C-terminal.)
Q7L592	SSGNEPAENPVTPMLR	YES	NADH dehydrogenase [ubiquinone] complex I, assembly factor 7	NDUFAF7;NADH dehydrogenase [ubiquinone] complex I, assembly factor 7;Protein midA homolog, mitochondrial;NDUF7;	(Human)	2	IPFIWRGKYF	SSGNEPAENP	30	441					Subtiligase Based Positive Selection			TRANSIT (Mitochondrion (Potential).)	CHAIN (NADH dehydrogenase [ubiquinone] complex I, assembly factor 7.)				-17
Q7L8L6	SSSKASTLQLGSPR	YES	FAST kinase domain-containing protein 5	FASTKD5;FAST kinase domain-containing protein 5;FAKD5;	(Human)	20	AHPGLEFSKT	SSSKASTLQL	84	764								CHAIN (FAST kinase domain-containing protein 5.)	MOD_RES (Phosphoserine.);MOD_RES (N6-acetyllysine.);DOMAIN (RAP.)
Q7Z6M4	TTASNGGVIEELSCVR	YES	mTERF domain-containing protein 2	MTERFD2;mTERF domain-containing protein 2;Mitochondrial transcription termination factor 4 Short=MTERF4;MTER2;	(Human)	2	RTTASLLRKL	TTASNGGVIE	44	381	X	X					TRANSIT (Mitochondrion.)	CHAIN (mTERF domain-containing protein 2.)	CHAIN (mTERF domain-containing protein 2 processed.);REGION (Dimerization with NSUN4.);REPEAT (MTERF 1.);REPEAT (MTERF 2.);REPEAT (MTERF 3.);REPEAT (MTERF 4.);REPEAT (MTERF 5.)				1
Q86U28	ASSSSPEAGEGQIR	YES	Iron-sulfur cluster assembly 2 homolog, mitochondrial	ISCA2;Iron-sulfur cluster assembly 2 homolog, mitochondrial;HESB-like domain-containing protein 1;ISCA2;	(Human)	14	ASLGPQARRE	ASSSSPEAGE	38	154					unknown;Subtiligase Based Positive Selection		TRANSIT (Mitochondrion (Potential).)	CHAIN (Iron-sulfur cluster assembly 2 homolog, mitochondrial.)					29
Q8IVS2	ASSFPVPPPGAQGVAELLR	YES	Malonyl-CoA-acyl carrier protein transacylase, mitochondrial	MCAT;Malonyl-CoA-acyl carrier protein transacylase, mitochondrial;Mitochondrial malonyl CoA:ACP acyltransferase ;Mitochondrial malonyltransferase ;[Acyl-carrier-protein] malonyltransferase;FABD;	(Human)	22	RGLGASYRRG	ASSFPVPPPG	22	390	X	X			Subtiligase Based Positive Selection		TRANSIT (Mitochondrion (Potential).)		CHAIN (Malonyl-CoA-acyl carrier protein transacylase, mitochondrial.);MOD_RES (N6-succinyllysine (By similarity).);ACT_SITE (By similarity.)				0
Q8N4H5	EDVISSIR	YES	Mitochondrial import receptor subunit TOM5 homolog	TOMM5;Mitochondrial import receptor subunit TOM5 homolog;TOM5;	(Human)	9	DPEEMKRKMR	EDVISSIRNF	22	51								CHAIN (Mitochondrial import receptor subunit TOM5 homolog.)	TRANSMEM (Helical; (Potential).)			-24
Q8NI37	AVLGGLSQTDPR	YES	Protein phosphatase PTC7 homolog	PPTC7;Protein phosphatase PTC7 homolog;T-cell activation protein phosphatase 2C Short=TA-PP2C ;T-cell activation protein phosphatase 2C-like;PPTC7;	(Human)	12	VLSYGRLVAR	AVLGGLSQTD	14	304					Subtiligase Based Positive Selection			CHAIN (Protein phosphatase PTC7 homolog.)	COMPBIAS (Gly-rich.);METAL (Manganese 1 (By similarity).);METAL (Manganese 2 (By similarity).);METAL (Manganese 1; via carbonyl oxygen (By similarity).);DOMAIN (PP2C-like.)
Q8TB36	PNLETYYER	YES	Ganglioside-induced differentiation-associated protein 1	GDAP1;Ganglioside-induced differentiation-associated protein 1;GDAP1;	(Human)	8	ARRNWGNGKR	PNLETYYERV	274	358							MOD_RES (N6-acetyllysine.);DOMAIN (GST N-terminal.);MUTAGEN (M->H: Impairment in the ability to induce mitochodrial fragmentation.);MUTAGEN (R->W: No effect on mitochondrial localization.);MUTAGEN (T->P: No effect on mitochondrial localization.)	CHAIN (Ganglioside-induced differentiation- associated protein 1.);DOMAIN (GST C-terminal.)	TRANSMEM (Helical; (Potential).);REGION (Required for mitochondrial localization.)			-67
Q8TB37	LSGAGSETLKQR	YES	Iron-sulfur protein NUBPL	NUBPL;Iron-sulfur protein NUBPL;IND1 homolog ;Nucleotide-binding protein-like ;huInd1;NUBPL;	(Human)	14	GSRAMVCGRQ	LSGAGSETLK	37	319	X	X						TRANSIT (Mitochondrion (Potential).)	CHAIN (Iron-sulfur protein NUBPL.);NP_BIND (ATP (Potential).);MUTAGEN (C->A: Defect in complex I assembly; when associated with A-247.);MUTAGEN (C->A: Defect in complex I assembly; when associated with A-244.)				-2
Q8TD30	SSAAAEASAVLKVRPER	YES	Alanine aminotransferase 2	GPT2;Alanine aminotransferase 2;Glutamate pyruvate transaminase 2 Short=GPT 2 ;Glutamic--alanine transaminase 2 ;Glutamic--pyruvic transaminase 2;ALAT2;	(Human)	16	RTPSSWGRSQ	SSAAAEASAV	25	523					Subtiligase Based Positive Selection;unknown			CHAIN (Alanine aminotransferase 2.)	MOD_RES (N6-(pyridoxal phosphate)lysine.);MOD_RES (N6-acetyllysine (By similarity).)
Q92552	LLSSAYVDSHKWEAR	YES	28S ribosomal protein S27, mitochondrial	MRPS27;28S ribosomal protein S27, mitochondrial;RT27;	(Human)	5	PQLSPAGKRY	LLSSAYVDSH	29	414					Subtiligase Based Positive Selection			CHAIN (28S ribosomal protein S27, mitochondrial.)	COILED (Potential.);REPEAT (PPR 1.);REPEAT (PPR 2.)
Q969Y2	SSGAPAPGSGATIFALSSGQGR	YES	tRNA modification GTPase GTPBP3, mitochondrial	GTPBP3;tRNA modification GTPase GTPBP3, mitochondrial;GTP-binding protein 3 ;Mitochondrial GTP-binding protein 1;GTPB3;	(Human)	19	RGPRRLCTRR	SSGAPAPGSG	24	492					Subtiligase Based Positive Selection;unknown			TRANSIT (Mitochondrion (Potential).)	CHAIN (tRNA modification GTPase GTPBP3, mitochondrial.);NP_BIND (GTP (Potential).);DOMAIN (TrmE-type G.)				-58
Q96A26	TKPQESPGAPSR	YES	Protein FAM162A	FAM162A;Protein FAM162A;E2-induced gene 5 protein ;Growth and transformation-dependent protein Short=HGTD-P;F162A;	(Human)	3	SDLKRINGFC	TKPQESPGAP	42	154					Subtiligase Based Positive Selection;unknown			CHAIN (Protein FAM162A.)	TRANSMEM (Helical; (Potential).);REGION (Required for proapoptotic activity.)			-79
Q96A35	ASKVTLPPHYR	YES	39S ribosomal protein L24, mitochondrial	MRPL24;39S ribosomal protein L24, mitochondrial;RM24;	(Human)	1	MRLSALLAL	ASKVTLPPHY	10	216	X	X					TRANSIT (Mitochondrion (By similarity).)		COMPBIAS (Poly-Arg.);DOMAIN (KOW.);CHAIN (39S ribosomal protein L24, mitochondrial.)				0
Q96AY3	EVQMGDFVR	YES	Peptidyl-prolyl cis-trans isomerase FKBP10	FKBP10;Peptidyl-prolyl cis-trans isomerase FKBP10;65 kDa FK506-binding protein Short=65 kDa FKBP Short=FKBP-65 ;FK506-binding protein 10 Short=FKBP-10 ;Immunophilin FKBP65 ;Rotamase;FKB10;	(Human)	17	RYHIPRACPR	EVQMGDFVRY	58	582			X				SIGNAL (Potential.)	CHAIN (Peptidyl-prolyl cis-trans isomerase FKBP10.)	CARBOHYD (N-linked (GlcNAc...) (Potential).);CARBOHYD (N-linked (GlcNAc...).);MOTIF (Prevents secretion from ER (Potential).);DOMAIN (PPIase FKBP-type 1.);DOMAIN (PPIase FKBP-type 2.);DOMAIN (PPIase FKBP-type 3.);DOMAIN (PPIase FKBP-type 4.);DOMAIN (EF-hand 1.);DOMAIN (EF-hand 2.);CA_BIND (1 (Potential).);CA_BIND (2 (Potential).)	31
Q96AY3	RASPAGGPLEDVVIER	YES	Peptidyl-prolyl cis-trans isomerase FKBP10	FKBP10;Peptidyl-prolyl cis-trans isomerase FKBP10;65 kDa FK506-binding protein Short=65 kDa FKBP Short=FKBP-65 ;FK506-binding protein 10 Short=FKBP-10 ;Immunophilin FKBP65 ;Rotamase;FKB10;	(Human)	17	VVQAVGRGLG	RASPAGGPLE	33	582							SIGNAL (Potential.)	CHAIN (Peptidyl-prolyl cis-trans isomerase FKBP10.)	CARBOHYD (N-linked (GlcNAc...) (Potential).);CARBOHYD (N-linked (GlcNAc...).);MOTIF (Prevents secretion from ER (Potential).);DOMAIN (PPIase FKBP-type 1.);DOMAIN (PPIase FKBP-type 2.);DOMAIN (PPIase FKBP-type 3.);DOMAIN (PPIase FKBP-type 4.);DOMAIN (EF-hand 1.);DOMAIN (EF-hand 2.);CA_BIND (1 (Potential).);CA_BIND (2 (Potential).)	6
Q96DV4	RRTPPLGPMPNSDIDLSNLER	YES	39S ribosomal protein L38, mitochondrial	MRPL38;39S ribosomal protein L38, mitochondrial;RM38;	(Human)	17	RGFSTSAVLG	RRTPPLGPMP	27	380	X	X					TRANSIT (Mitochondrion (Potential).)		CHAIN (39S ribosomal protein L38, mitochondrial.);COILED (Potential.)				0
Q96EH3	LHSEPGLEER	YES	Mitochondrial assembly of ribosomal large subunit protein 1	MALSU1;Mitochondrial assembly of ribosomal large subunit protein 1;MASU1;	(Human)	7	ACQTPNFVRG	LHSEPGLEER	61	234					unknown;Subtiligase Based Positive Selection			CHAIN (Mitochondrial assembly of ribosomal large subunit protein 1.)
Q96GW9	GPSTAA	YES	Methionine--tRNA ligase, mitochondrial	MARS2;Methionine--tRNA ligase, mitochondrial;Methionyl-tRNA synthetase 2 ;Mitochondrial methionyl-tRNA synthetase Short=MtMetRS;SYMM;	(Human)	2	DALCRHRRLR	GPSTAATRFS	80	593							MOTIF ("HIGH" region.);TRANSIT (Mitochondrion (Potential).)	CHAIN (Methionine--tRNA ligase, mitochondrial.)	MOTIF ("KMSKS" region.);BINDING (ATP (By similarity).)				50
Q96GW9	SSGSLSAGDDACDVR	YES	Methionine--tRNA ligase, mitochondrial	MARS2;Methionine--tRNA ligase, mitochondrial;Methionyl-tRNA synthetase 2 ;Mitochondrial methionyl-tRNA synthetase Short=MtMetRS;SYMM;	(Human)	2	LLEDFGPRYY	SSGSLSAGDD	30	593	X	X			unknown		TRANSIT (Mitochondrion (Potential).)		MOTIF ("HIGH" region.);MOTIF ("KMSKS" region.);CHAIN (Methionine--tRNA ligase, mitochondrial.);BINDING (ATP (By similarity).)				0
Q96HS1	TLGDTGFMPPDKITR	YES	Serine/threonine-protein phosphatase PGAM5, mitochondrial	PGAM5;Serine/threonine-protein phosphatase PGAM5, mitochondrial;Bcl-XL-binding protein v68 ;Phosphoglycerate mutase family member 5;PGAM5;	(Human)	12	IRPNGRVALR	TLGDTGFMPP	274	289							MOD_RES (Phosphoserine.);MOD_RES (N6-acetyllysine.);REGION (Interaction with KEAP1.);MUTAGEN (E->A: Loss of interaction with KEAP1; when associated with A-80.);MUTAGEN (S->A: Loss of interaction with KEAP1; when associated with A-79.);MUTAGEN (H->A: Loss of phosphatase activity.);TRANSMEM (Helical; (Potential).)	CHAIN (Serine/threonine-protein phosphatase PGAM5, mitochondrial.)				244
Q96RP9	ETITAPVPFDFTH	YES	Elongation factor G, mitochondrial	GFM1;Elongation factor G, mitochondrial;Elongation factor G 1, mitochondrial Short=mEF-G 1 ;Elongation factor G1 Short=hEFG1;EFGM;	(Human)	3	ITGKPKVAFR	ETITAPVPFD	527	751							MOD_RES (N6-acetyllysine.);NP_BIND (GTP (By similarity).);TRANSIT (Mitochondrion (Potential).)	CHAIN (Elongation factor G, mitochondrial.)					490
Q96RP9	SSSGVIPNEKIR	YES	Elongation factor G, mitochondrial	GFM1;Elongation factor G, mitochondrial;Elongation factor G 1, mitochondrial Short=mEF-G 1 ;Elongation factor G1 Short=hEFG1;EFGM;	(Human)	3	KQVNWKACRW	SSSGVIPNEK	36	751	X	X			unknown;Subtiligase Based Positive Selection			TRANSIT (Mitochondrion (Potential).)	CHAIN (Elongation factor G, mitochondrial.);MOD_RES (N6-acetyllysine.);NP_BIND (GTP (By similarity).)				-1
Q99623	AAQNISKTIATSQNR	YES	Prohibitin-2	PHB2;Prohibitin-2;B-cell receptor-associated protein BAP37 ;D-prohibitin ;Repressor of estrogen receptor activity;PHB2;	(Human)	12	PGYIKLRKIR	AAQNISKTIA	256	299							MOD_RES (N-acetylalanine.);MOD_RES (Phosphotyrosine.);MOD_RES (N6-acetyllysine (By similarity).);MOD_RES (N6-acetyllysine.);INIT_MET (Removed.);REGION (Necessary for transcriptional repression.);COILED (Potential.)	CHAIN (Prohibitin-2.)	MOD_RES (N6-acetyllysine (By similarity).)
Q99623	AQFLVEKAKQEQR	YES	Prohibitin-2	PHB2;Prohibitin-2;B-cell receptor-associated protein BAP37 ;D-prohibitin ;Repressor of estrogen receptor activity;PHB2;	(Human)	12	KQVAQQEAQR	AQFLVEKAKQ	210	299							MOD_RES (N-acetylalanine.);MOD_RES (Phosphotyrosine.);MOD_RES (N6-acetyllysine (By similarity).);INIT_MET (Removed.);REGION (Necessary for transcriptional repression.)	CHAIN (Prohibitin-2.);COILED (Potential.)	MOD_RES (N6-acetyllysine (By similarity).);MOD_RES (N6-acetyllysine.)
Q99623	AQVSLLIR	YES	Prohibitin-2	PHB2;Prohibitin-2;B-cell receptor-associated protein BAP37 ;D-prohibitin ;Repressor of estrogen receptor activity;PHB2;	(Human)	12	FNASQLITQR	AQVSLLIRRE	158	299							MOD_RES (N-acetylalanine.);MOD_RES (Phosphotyrosine.);MOD_RES (N6-acetyllysine (By similarity).);INIT_MET (Removed.);REGION (Necessary for transcriptional repression.)	REGION (Necessary for transcriptional repression.);CHAIN (Prohibitin-2.)	MOD_RES (N6-acetyllysine (By similarity).);MOD_RES (N6-acetyllysine.);COILED (Potential.)
Q99623	ESVFTVEGGHR	YES	Prohibitin-2	PHB2;Prohibitin-2;B-cell receptor-associated protein BAP37 ;D-prohibitin ;Repressor of estrogen receptor activity;PHB2;	(Human)	12	GAGAVAYGVR	ESVFTVEGGH	38	299							MOD_RES (N-acetylalanine.);INIT_MET (Removed.)	REGION (Necessary for transcriptional repression.);CHAIN (Prohibitin-2.)	MOD_RES (Phosphotyrosine.);MOD_RES (N6-acetyllysine (By similarity).);MOD_RES (N6-acetyllysine.);REGION (Necessary for transcriptional repression.);COILED (Potential.)
Q99623	EYTAAVEAKQVAQQEAQR	YES	Prohibitin-2	PHB2;Prohibitin-2;B-cell receptor-associated protein BAP37 ;D-prohibitin ;Repressor of estrogen receptor activity;PHB2;	(Human)	12	VAITELSFSR	EYTAAVEAKQ	192	299							MOD_RES (N-acetylalanine.);MOD_RES (Phosphotyrosine.);MOD_RES (N6-acetyllysine (By similarity).);INIT_MET (Removed.);REGION (Necessary for transcriptional repression.)	CHAIN (Prohibitin-2.);COILED (Potential.)	MOD_RES (N6-acetyllysine (By similarity).);MOD_RES (N6-acetyllysine.)
Q99623	IGGVQQDTILAEGLHFR	YES	Prohibitin-2	PHB2;Prohibitin-2;B-cell receptor-associated protein BAP37 ;D-prohibitin ;Repressor of estrogen receptor activity;PHB2;	(Human)	12	GGHRAIFFNR	IGGVQQDTIL	55	299							MOD_RES (N-acetylalanine.);INIT_MET (Removed.);REGION (Necessary for transcriptional repression.)	CHAIN (Prohibitin-2.)	MOD_RES (Phosphotyrosine.);MOD_RES (N6-acetyllysine (By similarity).);MOD_RES (N6-acetyllysine.);REGION (Necessary for transcriptional repression.);COILED (Potential.)
Q99623	LGLDYEER	YES	Prohibitin-2	PHB2;Prohibitin-2;B-cell receptor-associated protein BAP37 ;D-prohibitin ;Repressor of estrogen receptor activity;PHB2;	(Human)	12	AQELPSMYQR	LGLDYEERVL	124	299							MOD_RES (N-acetylalanine.);INIT_MET (Removed.);REGION (Necessary for transcriptional repression.)	CHAIN (Prohibitin-2.)	MOD_RES (Phosphotyrosine.);MOD_RES (N6-acetyllysine (By similarity).);MOD_RES (N6-acetyllysine.);REGION (Necessary for transcriptional repression.);COILED (Potential.)
Q99623	PNAQELPSMYQR	YES	Prohibitin-2	PHB2;Prohibitin-2;B-cell receptor-associated protein BAP37 ;D-prohibitin ;Repressor of estrogen receptor activity;PHB2;	(Human)	12	VNISLRVLSR	PNAQELPSMY	112	299							MOD_RES (N-acetylalanine.);INIT_MET (Removed.);REGION (Necessary for transcriptional repression.)	CHAIN (Prohibitin-2.)	MOD_RES (Phosphotyrosine.);MOD_RES (N6-acetyllysine (By similarity).);MOD_RES (N6-acetyllysine.);REGION (Necessary for transcriptional repression.);COILED (Potential.)
Q99623	TILAEGLHFR	YES	Prohibitin-2	PHB2;Prohibitin-2;B-cell receptor-associated protein BAP37 ;D-prohibitin ;Repressor of estrogen receptor activity;PHB2;	(Human)	12	FNRIGGVQQD	TILAEGLHFR	62	299							MOD_RES (N-acetylalanine.);INIT_MET (Removed.);REGION (Necessary for transcriptional repression.)	CHAIN (Prohibitin-2.)	MOD_RES (Phosphotyrosine.);MOD_RES (N6-acetyllysine (By similarity).);MOD_RES (N6-acetyllysine.);REGION (Necessary for transcriptional repression.);COILED (Potential.)
Q99643	GTTAKEEMER	YES	Succinate dehydrogenase cytochrome b560 subunit, mitochondrial	SDHC;Succinate dehydrogenase cytochrome b560 subunit, mitochondrial;Integral membrane protein CII-3 ;QPs-1 Short=QPs1 ;Succinate dehydrogenase complex subunit C ;Succinate-ubiquinone oxidoreductase cytochrome B large subunit Short=CYBL;C560;	(Human)	1	QLCIRNAVPL	GTTAKEEMER	31	169	X	X		MPPB			TRANSIT (Mitochondrion (By similarity).)	TOPO_DOM (Mitochondrial matrix (By similarity).);CHAIN (Succinate dehydrogenase cytochrome b560 subunit, mitochondrial.)	TOPO_DOM (Mitochondrial intermembrane (By similarity).);TOPO_DOM (Mitochondrial matrix (By similarity).);TRANSMEM (Helical; (By similarity).);METAL (Iron (heme axial ligand); shared with SDHD (By similarity).)			-62	1
Q99643	LGTTAKEEMER	YES	Succinate dehydrogenase cytochrome b560 subunit, mitochondrial	SDHC;Succinate dehydrogenase cytochrome b560 subunit, mitochondrial;Integral membrane protein CII-3 ;QPs-1 Short=QPs1 ;Succinate dehydrogenase complex subunit C ;Succinate-ubiquinone oxidoreductase cytochrome B large subunit Short=CYBL;C560;	(Human)	1	PQLCIRNAVP	LGTTAKEEME	30	169	X	X		MPPB			TRANSIT (Mitochondrion (By similarity).)		TOPO_DOM (Mitochondrial matrix (By similarity).);TOPO_DOM (Mitochondrial intermembrane (By similarity).);TRANSMEM (Helical; (By similarity).);CHAIN (Succinate dehydrogenase cytochrome b560 subunit, mitochondrial.);METAL (Iron (heme axial ligand); shared with SDHD (By similarity).)			-63	0
Q99714	DLAPIGIR	YES	3-hydroxyacyl-CoA dehydrogenase type-2	HSD17B10;3-hydroxyacyl-CoA dehydrogenase type-2;17-beta-hydroxysteroid dehydrogenase 10 Short=17-beta-HSD 10 EC=1.1.1.51 ;3-hydroxy-2-methylbutyryl-CoA dehydrogenase EC=1.1.1.178 ;3-hydroxyacyl-CoA dehydrogenase type II ;Endoplasmic reticulum-associated amyloid beta-peptide-binding protein ;Mitochondrial ribonuclease P protein 2 Short=Mitochondrial RNase P protein 2 ;Short-chain type dehydrogenas…	(Human)	X	IVGMTLPIAR	DLAPIGIRVM	185	261							MOD_RES (N-acetylalanine (By similarity).);MOD_RES (N6-acetyllysine; alternate (By similarity).);MOD_RES (N6-succinyllysine; alternate (By similarity).);MOD_RES (N6-acetyllysine (By similarity).);NP_BIND (NAD.);BINDING (Substrate.);BINDING (NAD.);ACT_SITE (Proton acceptor.);INIT_MET (Removed (By similarity).)	CHAIN (3-hydroxyacyl-CoA dehydrogenase type-2.)	MOD_RES (N6-acetyllysine; alternate (By similarity).);MOD_RES (N6-succinyllysine; alternate (By similarity).)
Q99714	LVAGEMGQNEPDQGGQR	YES	3-hydroxyacyl-CoA dehydrogenase type-2	HSD17B10;3-hydroxyacyl-CoA dehydrogenase type-2;17-beta-hydroxysteroid dehydrogenase 10 Short=17-beta-HSD 10 EC=1.1.1.51 ;3-hydroxy-2-methylbutyryl-CoA dehydrogenase EC=1.1.1.178 ;3-hydroxyacyl-CoA dehydrogenase type II ;Endoplasmic reticulum-associated amyloid beta-peptide-binding protein ;Mitochondrial ribonuclease P protein 2 Short=Mitochondrial RNase P protein 2 ;Short-chain type dehydrogenas…	(Human)	X	NLMGTFNVIR	LVAGEMGQNE	131	261							MOD_RES (N-acetylalanine (By similarity).);MOD_RES (N6-acetyllysine; alternate (By similarity).);MOD_RES (N6-succinyllysine; alternate (By similarity).);MOD_RES (N6-acetyllysine (By similarity).);NP_BIND (NAD.);INIT_MET (Removed (By similarity).)	CHAIN (3-hydroxyacyl-CoA dehydrogenase type-2.)	MOD_RES (N6-acetyllysine; alternate (By similarity).);MOD_RES (N6-succinyllysine; alternate (By similarity).);BINDING (Substrate.);BINDING (NAD.);ACT_SITE (Proton acceptor.)
Q99757	TTFNIQDGPDFQDR	YES	Thioredoxin, mitochondrial	TXN2;Thioredoxin, mitochondrial;Thioredoxin-2;THIOM;	(Human)	22	RTIYTTRISL	TTFNIQDGPD	60	166	X	X			Subtiligase Based Positive Selection		TRANSIT (Mitochondrion.)		MOD_RES (N6-acetyllysine; alternate.);MOD_RES (N6-succinyllysine; alternate (By similarity).);ACT_SITE (Nucleophile (By similarity).);DISULFID (Redox-active.);DOMAIN (Thioredoxin.);CHAIN (Thioredoxin, mitochondrial.);SITE (Deprotonates C-terminal active site Cys (By similarity).);SITE (Contributes to redox potential value (By similarity).)				0
Q99798	DGYAQILR	YES	Aconitate hydratase, mitochondrial	ACO2;Aconitate hydratase, mitochondrial;Citrate hydro-lyase;ACON;	(Human)	22	SEQIRATIER	DGYAQILRDL	430	780							CROSSLNK (Glycyl lysine isopeptide (Lys-Gly) (interchain with G-Cter in ubiquitin); alternate (By similarity).);MOD_RES (Pyrrolidone carboxylic acid (By similarity).);MOD_RES (N6-succinyllysine (By similarity).);MOD_RES (N6-acetyllysine; alternate (By similarity).);MOD_RES (N6-succinyllysine; alternate (By similarity).);BINDING (Substrate (By similarity).);METAL (Iron-sulfur (4Fe-4S) (By similari…	CHAIN (Aconitate hydratase, mitochondrial.)	MOD_RES (N6-succinyllysine (By similarity).);MOD_RES (Phosphoserine.);MOD_RES (N6-acetyllysine; alternate.);MOD_RES (N6-succinyllysine; alternate (By similarity).);MOD_RES (N6-acetyllysine; alternate (By similarity).);MOD_RES (N6-acetyllysine (By similarity).);BINDING (Substrate (By similarity).);METAL (Iron-sulfur (4Fe-4S) (By similarity).);REGION (Substrate binding (By similarity).)				402
Q99798	NAVTQEFGPVPDTAR	YES	Aconitate hydratase, mitochondrial	ACO2;Aconitate hydratase, mitochondrial;Citrate hydro-lyase;ACON;	(Human)	22	IENGKANSVR	NAVTQEFGPV	634	780					Subtiligase Based Positive Selection		CROSSLNK (Glycyl lysine isopeptide (Lys-Gly) (interchain with G-Cter in ubiquitin); alternate (By similarity).);MOD_RES (Pyrrolidone carboxylic acid (By similarity).);MOD_RES (N6-succinyllysine (By similarity).);MOD_RES (N6-acetyllysine; alternate (By similarity).);MOD_RES (N6-succinyllysine; alternate (By similarity).);MOD_RES (Phosphoserine.);MOD_RES (N6-acetyllysine; alternate.);BINDING (Subst…	CHAIN (Aconitate hydratase, mitochondrial.)	MOD_RES (N6-succinyllysine (By similarity).);MOD_RES (N6-acetyllysine; alternate (By similarity).);MOD_RES (N6-succinyllysine; alternate (By similarity).);MOD_RES (N6-acetyllysine (By similarity).);REGION (Substrate binding (By similarity).)				606
Q99807	RSSGMTLDNISR	YES	Ubiquinone biosynthesis protein COQ7 homolog	COQ7;Ubiquinone biosynthesis protein COQ7 homolog;Coenzyme Q biosynthesis protein 7 homolog ;Timing protein clk-1 homolog;COQ7;	(Human)	16	AYGRRTSVRF	RSSGMTLDNI	35	217	X	X			unknown;Subtiligase Based Positive Selection		COMPBIAS (Poly-Ala.)	TRANSIT (Mitochondrion (Potential).)	REPEAT (1.);REPEAT (2.);CHAIN (Ubiquinone biosynthesis protein COQ7 homolog.);METAL (Iron 1 (By similarity).);METAL (Iron 2 (By similarity).);REGION (2 X approximate tandem repeats.)				-2
Q9BPW8	SKDNEGSWFR	YES	Protein NipSnap homolog 1	NIPSNAP1;Protein NipSnap homolog 1;NIPS1;	(Human)	22	VASAAAARFY	SKDNEGSWFR	36	284					unknown;Subtiligase Based Positive Selection			CHAIN (Protein NipSnap homolog 1.)	MOD_RES (N6-acetyllysine (By similarity).);MOD_RES (N6-acetyllysine; alternate.);MOD_RES (N6-succinyllysine; alternate (By similarity).);MOD_RES (N6-acetyllysine; alternate (By similarity).)
Q9BPW8	SQMLLSR	YES	Protein NipSnap homolog 1	NIPSNAP1;Protein NipSnap homolog 1;NIPS1;	(Human)	22	KEYLEFRRER	SQMLLSRRNQ	156	284							MOD_RES (N6-acetyllysine (By similarity).);MOD_RES (N6-acetyllysine; alternate.);MOD_RES (N6-succinyllysine; alternate (By similarity).)	CHAIN (Protein NipSnap homolog 1.)	MOD_RES (N6-acetyllysine (By similarity).);MOD_RES (N6-acetyllysine; alternate (By similarity).);MOD_RES (N6-succinyllysine; alternate (By similarity).)
Q9BPW8	YSKDNEGSWFR	YES	Protein NipSnap homolog 1	NIPSNAP1;Protein NipSnap homolog 1;NIPS1;	(Human)	22	DVASAAAARF	YSKDNEGSWF	35	284					unknown;Subtiligase Based Positive Selection			CHAIN (Protein NipSnap homolog 1.)	MOD_RES (N6-acetyllysine (By similarity).);MOD_RES (N6-acetyllysine; alternate.);MOD_RES (N6-succinyllysine; alternate (By similarity).);MOD_RES (N6-acetyllysine; alternate (By similarity).)
Q9BQ95	AALAR	YES	Evolutionarily conserved signaling intermediate in Toll pathway, mitochondrial	ECSIT;Evolutionarily conserved signaling intermediate in Toll pathway, mitochondrial;Protein SITPEC;ECSIT;	(Human)	19	IVGIQSPDQQ	AALARHNPAR	274	431							TRANSIT (Mitochondrion (Potential).)	CHAIN (Evolutionarily conserved signaling intermediate in Toll pathway, mitochondrial.)					225
Q9BQ95	SSEQSLVPSPPEPR	YES	Evolutionarily conserved signaling intermediate in Toll pathway, mitochondrial	ECSIT;Evolutionarily conserved signaling intermediate in Toll pathway, mitochondrial;Protein SITPEC;ECSIT;	(Human)	19	RGLHCSAAAH	SSEQSLVPSP	49	431	X	X			unknown;Subtiligase Based Positive Selection		TRANSIT (Mitochondrion (Potential).)		CHAIN (Evolutionarily conserved signaling intermediate in Toll pathway, mitochondrial.)				0
Q9BU61	HRLSPADDELYQR	YES	NADH dehydrogenase [ubiquinone] 1 alpha subcomplex assembly factor 3	NDUFAF3;NADH dehydrogenase [ubiquinone] 1 alpha subcomplex assembly factor 3;NDUF3;	(Human)	3	VELPWAPRRG	HRLSPADDEL	32	184								CHAIN (NADH dehydrogenase [ubiquinone] 1 alpha subcomplex assembly factor 3.)
Q9BUB7	LNTPSDKSEDGR	YES	Transmembrane protein 70, mitochondrial	TMEM70;Transmembrane protein 70, mitochondrial;TMM70;	(Human)	8	PVYWEGYVRF	LNTPSDKSED	82	260	X	X			Subtiligase Based Positive Selection		TRANSIT (Mitochondrion (Potential).)		CHAIN (Transmembrane protein 70, mitochondrial.);TRANSMEM (Helical; (Potential).)			-81	0
Q9BV79	AEPAR	YES	Trans-2-enoyl-CoA reductase, mitochondrial	MECR;Trans-2-enoyl-CoA reductase, mitochondrial;Nuclear receptor-binding factor 1 Short=HsNrbf-1 Short=NRBF-1;MECR;	(Human)	1	GPAASSYSAS	AEPARVRALV	38	373					Subtiligase Based Positive Selection			TRANSIT (Mitochondrion (Potential).)	CHAIN (Trans-2-enoyl-CoA reductase, mitochondrial.);MOD_RES (N6-acetyllysine; alternate (By similarity).);MOD_RES (N6-succinyllysine; alternate (By similarity).);MOD_RES (N6-succinyllysine (By similarity).);NP_BIND (NADP (By similarity).);BINDING (NADP (By similarity).);MUTAGEN (S->A: Reduces catalytic activity by 68%.);MUTAGEN (Y->F: Reduces catalytic activity by 95%. Strongly reduces affinity f…				-16
Q9BV79	ASSYSASAEPAR	YES	Trans-2-enoyl-CoA reductase, mitochondrial	MECR;Trans-2-enoyl-CoA reductase, mitochondrial;Nuclear receptor-binding factor 1 Short=HsNrbf-1 Short=NRBF-1;MECR;	(Human)	1	LPASGCHGPA	ASSYSASAEP	31	373					Subtiligase Based Positive Selection;unknown			TRANSIT (Mitochondrion (Potential).)	CHAIN (Trans-2-enoyl-CoA reductase, mitochondrial.);MOD_RES (N6-acetyllysine; alternate (By similarity).);MOD_RES (N6-succinyllysine; alternate (By similarity).);MOD_RES (N6-succinyllysine (By similarity).);NP_BIND (NADP (By similarity).);BINDING (NADP (By similarity).);MUTAGEN (S->A: Reduces catalytic activity by 68%.);MUTAGEN (Y->F: Reduces catalytic activity by 95%. Strongly reduces affinity f…				-23
Q9BV79	SSYSASAEPAR	YES	Trans-2-enoyl-CoA reductase, mitochondrial	MECR;Trans-2-enoyl-CoA reductase, mitochondrial;Nuclear receptor-binding factor 1 Short=HsNrbf-1 Short=NRBF-1;MECR;	(Human)	1	PASGCHGPAA	SSYSASAEPA	32	373					Subtiligase Based Positive Selection;unknown			TRANSIT (Mitochondrion (Potential).)	CHAIN (Trans-2-enoyl-CoA reductase, mitochondrial.);MOD_RES (N6-acetyllysine; alternate (By similarity).);MOD_RES (N6-succinyllysine; alternate (By similarity).);MOD_RES (N6-succinyllysine (By similarity).);NP_BIND (NADP (By similarity).);BINDING (NADP (By similarity).);MUTAGEN (S->A: Reduces catalytic activity by 68%.);MUTAGEN (Y->F: Reduces catalytic activity by 95%. Strongly reduces affinity f…				-22
Q9BVL4	STLSGAAMEPAPR	YES	Selenoprotein O	SELO;Selenoprotein O;SELO;	(Human)		GRCSPSPAPR	STLSGAAMEP	31	669					unknown;Subtiligase Based Positive Selection			CHAIN (Selenoprotein O.)	NON_STD (Selenocysteine.)
Q9BVV7	AKEDGSKQVSVHR	YES	Mitochondrial import inner membrane translocase subunit Tim21	TIMM21;Mitochondrial import inner membrane translocase subunit Tim21;TIM21-like protein, mitochondrial;TIM21;	(Human)	18	IWTQGPSPRK	AKEDGSKQVS	75	248							TRANSIT (Mitochondrion (Potential).)	CHAIN (Mitochondrial import inner membrane translocase subunit Tim21.)	TRANSMEM (Helical; (Potential).)			-54	56
Q9BW92	LHTAVVSTPPR	YES	Threonine--tRNA ligase, mitochondrial	TARS2;Threonine--tRNA ligase, mitochondrial;Threonyl-tRNA synthetase Short=ThrRS ;Threonyl-tRNA synthetase-like 1;SYTM;	(Human)	1	LRLQGLQACR	LHTAVVSTPP	20	718					unknown;Subtiligase Based Positive Selection		TRANSIT (Mitochondrion (Potential).)	CHAIN (Threonine--tRNA ligase, mitochondrial.)	MOD_RES (Phosphoserine.)				19
Q9BWM7	ELQVGIPVADEAGQR	YES	Sideroflexin-3	SFXN3;Sideroflexin-3;SFXN3;	(Human)	10	CINIPLMRQR	ELQVGIPVAD	203	325							TRANSMEM (Helical; (Potential).)	CHAIN (Sideroflexin-3.)	TRANSMEM (Helical; (Potential).)			-88
Q9BWM7	NLLLSGAQLEASR	YES	Sideroflexin-3	SFXN3;Sideroflexin-3;SFXN3;	(Human)	10	RHFFTVTDPR	NLLLSGAQLE	39	325								CHAIN (Sideroflexin-3.)	TRANSMEM (Helical; (Potential).)			-252
Q9BX68	AAGVTDGNEVAKAQQATPGGAAPTIFSR	YES	Histidine triad nucleotide-binding protein 2, mitochondrial	HINT2;Histidine triad nucleotide-binding protein 2, mitochondrial;HINT-3 ;HIT-17kDa ;PKCI-1-related HIT protein;HINT2;	(Human)	9	TGVRGGQVRG	AAGVTDGNEV	31	163					Subtiligase Based Positive Selection;unknown		TRANSIT (Mitochondrion (Potential).)	CHAIN (Histidine triad nucleotide-binding protein 2, mitochondrial.)	MOTIF (Histidine triad motif.);MOD_RES (N6-acetyllysine (By similarity).);NP_BIND (Purine nucleotide phosphoramidate (By similarity).);BINDING (Purine nucleotide phosphoramidate (By similarity).);ACT_SITE (Tele-AMP-histidine intermediate.);DOMAIN (HIT.);MUTAGEN (H->A: Loss of adenosine phosphoramidase activity.)				13
Q9BYD3	SSLAEEAAR	YES	39S ribosomal protein L4, mitochondrial	MRPL4;39S ribosomal protein L4, mitochondrial;RM04;	(Human)	19	WLRPTGSQGL	SSLAEEAARA	22	311					Subtiligase Based Positive Selection;unknown			CHAIN (39S ribosomal protein L4, mitochondrial.)
Q9BYD3	VGLADLHPDVFATAPR	YES	39S ribosomal protein L4, mitochondrial	MRPL4;39S ribosomal protein L4, mitochondrial;RM04;	(Human)	19	ESLRGFEQER	VGLADLHPDV	77	311								CHAIN (39S ribosomal protein L4, mitochondrial.)
Q9H078	YSKSPSNKDAALLEAAR	YES	Caseinolytic peptidase B protein homolog	CLPB;Caseinolytic peptidase B protein homolog;Suppressor of potassium transport defect 3;CLPB;	(Human)	11	ALAAALVVHC	YSKSPSNKDA	127	707					Subtiligase Based Positive Selection			CHAIN (Caseinolytic peptidase B protein homolog.)	NP_BIND (ATP (Potential).);REPEAT (ANK 1.);REPEAT (ANK 2.);REPEAT (ANK 3.);REPEAT (ANK 4.);MOD_RES (N6-acetyllysine.)
Q9H0U6	STSSEPAAKPEVDPVENEAVAPEFTNR	YES	39S ribosomal protein L18, mitochondrial	MRPL18;39S ribosomal protein L18, mitochondrial;RM18;	(Human)		RNPGCRFAAL	STSSEPAAKP	25	180					Subtiligase Based Positive Selection	X	TRANSIT (Mitochondrion (Potential).)	CHAIN (39S ribosomal protein L18, mitochondrial.)					24
Q9H2U2	ALYHTEER	YES	Inorganic pyrophosphatase 2, mitochondrial	PPA2;Inorganic pyrophosphatase 2, mitochondrial;Pyrophosphatase SID6-306 ;Pyrophosphate phospho-hydrolase 2 Short=PPase 2;IPYR2;	(Human)	4	SAGTGSRRAM	ALYHTEERGQ	33	334	X	X			Subtiligase Based Positive Selection;unknown;N-TAILS	X	TRANSIT (Mitochondrion.)		CHAIN (Inorganic pyrophosphatase 2, mitochondrial.);METAL (Magnesium 1 (By similarity).);METAL (Magnesium 2 (By similarity).);MOD_RES (N6-succinyllysine (By similarity).);MOD_RES (N6-acetyllysine (By similarity).);MOD_RES (N6-acetyllysine.);MOD_RES (Phosphoserine.)				0
Q9H2W6	ALAAAPSSNGSPWR	YES	39S ribosomal protein L46, mitochondrial	MRPL46;39S ribosomal protein L46, mitochondrial;P2ECSL;RM46;	(Human)		WAGSLSSRSL	ALAAAPSSNG	33	279					Subtiligase Based Positive Selection;unknown		TRANSIT (Mitochondrion (Potential).)	CHAIN (39S ribosomal protein L46, mitochondrial.)	MOD_RES (N6-acetyllysine.)				32
Q9H5Q4	HCGLSDSSPQLWPEPDFR	YES	Dimethyladenosine transferase 2, mitochondrial	TFB2M;Dimethyladenosine transferase 2, mitochondrial;Hepatitis C virus NS5A-transactivated protein 5 Short=HCV NS5A-transactivated protein 5 ;Mitochondrial 12S rRNA dimethylase 2 ;Mitochondrial transcription factor B2 Short=h-mtTFB Short=h-mtTFB2 Short=hTFB2M Short=mtTFB2 ;S-adenosylmethionine-6-N', N'-adenosyl(rRNA) dimethyltransferase 2;TFB2M;	(Human)	1	ATRKHLPARN	HCGLSDSSPQ	41	396					Subtiligase Based Positive Selection		TRANSIT (Mitochondrion (Potential).)	CHAIN (Dimethyladenosine transferase 2, mitochondrial.)	MUTAGEN (G->A: Abolishes methyltransferase activity.);BINDING (S-adenosyl-L-methionine; via amide nitrogen (By similarity).);BINDING (S-adenosyl-L-methionine (By similarity).)				21
Q9H5Q4	SLTPLDAR	YES	Dimethyladenosine transferase 2, mitochondrial	TFB2M;Dimethyladenosine transferase 2, mitochondrial;Hepatitis C virus NS5A-transactivated protein 5 Short=HCV NS5A-transactivated protein 5 ;Mitochondrial 12S rRNA dimethylase 2 ;Mitochondrial transcription factor B2 Short=h-mtTFB Short=h-mtTFB2 Short=hTFB2M Short=mtTFB2 ;S-adenosylmethionine-6-N', N'-adenosyl(rRNA) dimethyltransferase 2;TFB2M;	(Human)	1	RSATVIDHLR	SLTPLDARDI	341	396							TRANSIT (Mitochondrion (Potential).);MUTAGEN (G->A: Abolishes methyltransferase activity.);BINDING (S-adenosyl-L-methionine; via amide nitrogen (By similarity).);BINDING (S-adenosyl-L-methionine (By similarity).)	CHAIN (Dimethyladenosine transferase 2, mitochondrial.)					321
Q9H9B4	NILLTNEQLESAR	YES	Sideroflexin-1	SFXN1;Sideroflexin-1;Tricarboxylate carrier protein Short=TCC;SFXN1;	(Human)	5	NHFFTVTDPR	NILLTNEQLE	36	322							MOD_RES (N-acetylserine.);INIT_MET (Removed.)	CHAIN (Sideroflexin-1.)	TRANSMEM (Helical; (Potential).)			-252
Q9NP92	ATATETTCQDVAATPVAR	YES	28S ribosomal protein S30, mitochondrial	MRPS30;28S ribosomal protein S30, mitochondrial;Programmed cell death protein 9;RT30;	(Human)		LSLHTAANAA	ATATETTCQD	26	439								CHAIN (28S ribosomal protein S30, mitochondrial.)
Q9NP92	GEEIIPR	YES	28S ribosomal protein S30, mitochondrial	MRPS30;28S ribosomal protein S30, mitochondrial;Programmed cell death protein 9;RT30;	(Human)		RCPVHFYWVR	GEEIIPRGHR	213	439								CHAIN (28S ribosomal protein S30, mitochondrial.)
Q9NP92	LHTAANAAATATETTCQDVAATPVAR	YES	28S ribosomal protein S30, mitochondrial	MRPS30;28S ribosomal protein S30, mitochondrial;Programmed cell death protein 9;RT30;	(Human)		RPLLRGPRLS	LHTAANAAAT	18	439					Subtiligase Based Positive Selection			CHAIN (28S ribosomal protein S30, mitochondrial.)
Q9NP92	TATETTCQDVAATPVAR	YES	28S ribosomal protein S30, mitochondrial	MRPS30;28S ribosomal protein S30, mitochondrial;Programmed cell death protein 9;RT30;	(Human)		SLHTAANAAA	TATETTCQDV	27	439								CHAIN (28S ribosomal protein S30, mitochondrial.)
Q9NPH0	ELQEADGQCPVDR	YES	Lysophosphatidic acid phosphatase type 6	ACP6;Lysophosphatidic acid phosphatase type 6;Acid phosphatase 6, lysophosphatidic ;Acid phosphatase-like protein 1 ;PACPL1;PPA6;	(Human)	1	CLHQRRVALA	ELQEADGQCP	33	428	X	X					TRANSIT (Mitochondrion.)		ACT_SITE (Nucleophile.);ACT_SITE (Proton donor (Probable).);REGION (Substrate binding (By similarity).);CHAIN (Lysophosphatidic acid phosphatase type 6.);MUTAGEN (R->A: Abolishes enzyme activity.);MUTAGEN (H->A: Abolishes enzyme activity.);MUTAGEN (Y->F: Decreases enzyme activity.);MUTAGEN (A->F,L: Decreases enzyme activity by interfering with water access to the active site cavity.);MUTAGEN (A->…				0
Q9NPL8	AEAVTADSEVLEER	YES	Complex I assembly factor TIMMDC1, mitochondrial	TIMMDC1;Complex I assembly factor TIMMDC1, mitochondrial;Protein M5-14 ;Translocase of inner mitochondrial membrane domain-containing protein 1;TIDC1;	(Human)	3	ALCLFPRVFA	AEAVTADSEV	25	285					Subtiligase Based Positive Selection			CHAIN (Complex I assembly factor TIMMDC1, mitochondrial.)	TRANSMEM (Helical; (Potential).)			-185
Q9NQH7	SLQPVPER	YES	Probable Xaa-Pro aminopeptidase 3	XPNPEP3;Probable Xaa-Pro aminopeptidase 3;Aminopeptidase P3 Short=APP3;XPP3;M24.026	(Human)	22	GCMLCSQRRY	SLQPVPERRI	32	507					unknown;Subtiligase Based Positive Selection			CHAIN (Probable Xaa-Pro aminopeptidase 3.)	METAL (Manganese 2 (By similarity).);METAL (Manganese 1 (By similarity).)
Q9NR28	AESEQEAYLR	YES	Diablo homolog, mitochondrial	DIABLO;Diablo homolog, mitochondrial;Direct IAP-binding protein with low pI ;Second mitochondria-derived activator of caspase Short=Smac;DBLOH;	(Human)	12	QKTQEEGEER	AESEQEAYLR	228	239							MOTIF (IAP-binding.);TRANSIT (Mitochondrion.)	CHAIN (Diablo homolog, mitochondrial.)					172
Q9NR28	AVPIAQKSEPHSLSSEALMR	YES	Diablo homolog, mitochondrial	DIABLO;Diablo homolog, mitochondrial;Direct IAP-binding protein with low pI ;Second mitochondria-derived activator of caspase Short=Smac;DBLOH;	(Human)	12	VTIGFGVTLC	AVPIAQKSEP	56	239	X	X			unknown;Subtiligase Based Positive Selection		TRANSIT (Mitochondrion.)		CHAIN (Diablo homolog, mitochondrial.);MOTIF (IAP-binding.)				0
Q9NSE4	EAQNLSAMEIR	YES	Isoleucine--tRNA ligase, mitochondrial	IARS2;Isoleucine--tRNA ligase, mitochondrial;Isoleucyl-tRNA synthetase Short=IleRS;SYIM;	(Human)	1	EIKVLSELGR	EAQNLSAMEI	171	1012							MOD_RES (N6-acetyllysine; alternate (By similarity).);MOD_RES (N6-succinyllysine; alternate (By similarity).);MOTIF ("HIGH" region (By similarity).);TRANSIT (Mitochondrion (Potential).)	CHAIN (Isoleucine--tRNA ligase, mitochondrial.)	MOD_RES (N6-acetyllysine.);MOD_RES (N6-succinyllysine (By similarity).);MOD_RES (N6-acetyllysine; alternate.);MOD_RES (N6-succinyllysine; alternate (By similarity).);MOD_RES (N6-acetyllysine (By similarity).);MOTIF ("KMSKS" region (By similarity).);BINDING (ATP (By similarity).)				122
Q9NSE4	VSGASNHQPNSNSGR	YES	Isoleucine--tRNA ligase, mitochondrial	IARS2;Isoleucine--tRNA ligase, mitochondrial;Isoleucyl-tRNA synthetase Short=IleRS;SYIM;	(Human)	1	GATKRLLVRS	VSGASNHQPN	45	1012					unknown;Subtiligase Based Positive Selection			TRANSIT (Mitochondrion (Potential).)	MOD_RES (N6-acetyllysine; alternate (By similarity).);MOD_RES (N6-succinyllysine; alternate (By similarity).);MOD_RES (N6-acetyllysine.);MOD_RES (N6-succinyllysine (By similarity).);MOD_RES (N6-acetyllysine; alternate.);MOD_RES (N6-acetyllysine (By similarity).);MOTIF ("HIGH" region (By similarity).);MOTIF ("KMSKS" region (By similarity).);CHAIN (Isoleucine--tRNA ligase, mitochondrial.);BINDING (…				-4
Q9NUT2	EAEEAPPASSTPHVVGSR	YES	ATP-binding cassette sub-family B member 8, mitochondrial	ABCB8;ATP-binding cassette sub-family B member 8, mitochondrial;Mitochondrial ATP-binding cassette 1 Short=M-ABC1;ABCB8;	(Human)	7	HPHLCLVALC	EAEEAPPASS	114	735							TRANSMEM (Helical; (Potential).);TRANSIT (Mitochondrion (Probable).)	CHAIN (ATP-binding cassette sub-family B member 8, mitochondrial.)	NP_BIND (ATP (Potential).);DOMAIN (ABC transmembrane type-1.);DOMAIN (ABC transporter.);TRANSMEM (Helical; (Potential).);MUTAGEN (GK->AR: Renders the protein unstable.)			-290	58
Q9NVI7	ITVLEALR	YES	ATPase family AAA domain-containing protein 3A	ATAD3A;ATPase family AAA domain-containing protein 3A;ATD3A;	(Human)	1	KPSLVRETSR	ITVLEALRHP	339	634							TOPO_DOM (Mitochondrial intermembrane (Potential).);TRANSMEM (Helical; (Potential).);INIT_MET (Removed.);MOD_RES (N-acetylserine.);COILED (Potential.);REGION (Required for interaction with the inner surface of the mitochondrial outer membrane.)	TOPO_DOM (Mitochondrial matrix (Potential).);CHAIN (ATPase family AAA domain-containing protein 3A.);REGION (S100B-binding.)	NP_BIND (ATP (Potential).);MOD_RES (N6-acetyllysine.);MUTAGEN (V->S: Loss of S100B-binding; when associated with S-345.);MUTAGEN (L->S: Loss of S100B-binding; when associated with S-341.);MUTAGEN (Missing: Decrease in S100B-binding.);MUTAGEN (K->E: No effect on homooligomerization. Immediate fragmentation of the mitochondrial network.);MUTAGEN (D->Q: No effect on homooligomerization. Immediate fr…			26
Q9NVI7	PQDALEGVVLSPSLEAR	YES	ATPase family AAA domain-containing protein 3A	ATAD3A;ATPase family AAA domain-containing protein 3A;ATD3A;	(Human)	1	IQVSRRLLSR	PQDALEGVVL	359	634							TOPO_DOM (Mitochondrial intermembrane (Potential).);TRANSMEM (Helical; (Potential).);INIT_MET (Removed.);MOD_RES (N-acetylserine.);MUTAGEN (V->S: Loss of S100B-binding; when associated with S-345.);MUTAGEN (L->S: Loss of S100B-binding; when associated with S-341.);MUTAGEN (Missing: Decrease in S100B-binding.);COILED (Potential.);REGION (Required for interaction with the inner surface of the mitoc…	TOPO_DOM (Mitochondrial matrix (Potential).);CHAIN (ATPase family AAA domain-containing protein 3A.)	NP_BIND (ATP (Potential).);MOD_RES (N6-acetyllysine.);MUTAGEN (K->E: No effect on homooligomerization. Immediate fragmentation of the mitochondrial network.);MUTAGEN (D->Q: No effect on homooligomerization. Immediate fragmentation of the mitochondrial network.)			46
Q9NVI7	QTVLESIR	YES	ATPase family AAA domain-containing protein 3A	ATAD3A;ATPase family AAA domain-containing protein 3A;ATD3A;	(Human)	1	QIRLKAAEHR	QTVLESIRTA	268	634							INIT_MET (Removed.);MOD_RES (N-acetylserine.);COILED (Potential.);REGION (Required for interaction with the inner surface of the mitochondrial outer membrane.)	TOPO_DOM (Mitochondrial intermembrane (Potential).);CHAIN (ATPase family AAA domain-containing protein 3A.)	NP_BIND (ATP (Potential).);TOPO_DOM (Mitochondrial matrix (Potential).);TRANSMEM (Helical; (Potential).);MOD_RES (N6-acetyllysine.);MUTAGEN (V->S: Loss of S100B-binding; when associated with S-345.);MUTAGEN (L->S: Loss of S100B-binding; when associated with S-341.);MUTAGEN (Missing: Decrease in S100B-binding.);MUTAGEN (K->E: No effect on homooligomerization. Immediate fragmentation of the mitocho…			-45
Q9NVV4	SCPGTVAKDLR	YES	Poly(A) RNA polymerase, mitochondrial	MTPAP;Poly(A) RNA polymerase, mitochondrial;PAP-associated domain-containing protein 1 ;Polynucleotide adenylyltransferase ;Terminal uridylyltransferase 1 Short=TUTase 1 ;mtPAP;PAPD1;	(Human)	10	RVQRPIVRLL	SCPGTVAKDL	31	582					unknown			TRANSIT (Mitochondrion (Potential).)	MOD_RES (N6-acetyllysine.);NP_BIND (ATP (Potential).);METAL (Magnesium or manganese; catalytic (By similarity).);DOMAIN (PAP-associated.);CHAIN (Poly(A) RNA polymerase, mitochondrial.);MUTAGEN (YF->AA: Reduces dimerization.);MUTAGEN (F->A: Reduced enzyme activity.);MUTAGEN (HKI->AAA: No effect on dimerization. Loss of dimerization and of enzyme activity; when associated with 294-AAAA-297.);MUTAGE…				-7
Q9NX63	LSENVIDR	YES	Coiled-coil-helix-coiled-coil-helix domain-containing protein 3, mitochondrial	CHCHD3;Coiled-coil-helix-coiled-coil-helix domain-containing protein 3, mitochondrial;CHCH3;	(Human)	7	ENITVVKGIR	LSENVIDRMK	28	227							LIPID (N-myristoyl glycine (By similarity).);INIT_MET (Removed (By similarity).)	CHAIN (Coiled-coil-helix-coiled-coil-helix domain-containing protein 3, mitochondrial.)	DOMAIN (CHCH.);MOD_RES (Phosphotyrosine.);MOD_RES (Phosphoserine.);MOD_RES (N6-acetyllysine.)
Q9NYK5	IATSSASQLSPTELTEMR	YES	39S ribosomal protein L39, mitochondrial	MRPL39;39S ribosomal protein L39, mitochondrial;39S ribosomal protein L5, mitochondrial Short=L5mt Short=MRP-L5;RM39;	(Human)	21	APGGGIKWRF	IATSSASQLS	27	338					Subtiligase Based Positive Selection;unknown			CHAIN (39S ribosomal protein L39, mitochondrial.)	MOD_RES (N6-acetyllysine.)
Q9UJS0	AGQTTYSGVIDCFR	YES	Calcium-binding mitochondrial carrier protein Aralar2	SLC25A13;Calcium-binding mitochondrial carrier protein Aralar2;Citrin ;Mitochondrial aspartate glutamate carrier 2 ;Solute carrier family 25 member 13;CMC2;	(Human)	7	IKTRLQVAAR	AGQTTYSGVI	554	675							CA_BIND (1.);CA_BIND (2.);CA_BIND (3.);REPEAT (Solcar 1.);REPEAT (Solcar 2.);DOMAIN (EF-hand 1.);DOMAIN (EF-hand 2.);DOMAIN (EF-hand 3.);DOMAIN (EF-hand 4.);TRANSMEM (Helical; Name=1; (Potential).);TRANSMEM (Helical; Name=2; (Potential).);TRANSMEM (Helical; Name=3; (Potential).);TRANSMEM (Helical; Name=4; (Potential).);TRANSMEM (Helical; Name=5; (Potential).);INIT_MET (Removed.);MOD_RES (N-acetyl…	REPEAT (Solcar 3.);CHAIN (Calcium-binding mitochondrial carrier protein Aralar2.)	TRANSMEM (Helical; Name=6; (Potential).);MOD_RES (N6-succinyllysine (By similarity).);MOD_RES (N6-acetyllysine (By similarity).)			-47
Q9UJS0	IAPLEEGTLPFNLAEAQR	YES	Calcium-binding mitochondrial carrier protein Aralar2	SLC25A13;Calcium-binding mitochondrial carrier protein Aralar2;Citrin ;Mitochondrial aspartate glutamate carrier 2 ;Solute carrier family 25 member 13;CMC2;	(Human)	7	GRMTLADIER	IAPLEEGTLP	293	675							CA_BIND (1.);CA_BIND (2.);CA_BIND (3.);DOMAIN (EF-hand 1.);DOMAIN (EF-hand 2.);DOMAIN (EF-hand 3.);DOMAIN (EF-hand 4.);INIT_MET (Removed.);MOD_RES (N-acetylalanine.)	CHAIN (Calcium-binding mitochondrial carrier protein Aralar2.)	REPEAT (Solcar 1.);REPEAT (Solcar 2.);REPEAT (Solcar 3.);TRANSMEM (Helical; Name=1; (Potential).);TRANSMEM (Helical; Name=2; (Potential).);TRANSMEM (Helical; Name=3; (Potential).);TRANSMEM (Helical; Name=4; (Potential).);TRANSMEM (Helical; Name=5; (Potential).);TRANSMEM (Helical; Name=6; (Potential).);MOD_RES (N6-acetyllysine (By similarity).);MOD_RES (N6-acetyllysine; alternate (By similarity).)…			-308
Q9UJS0	LQVAGEITTGPR	YES	Calcium-binding mitochondrial carrier protein Aralar2	SLC25A13;Calcium-binding mitochondrial carrier protein Aralar2;Citrin ;Mitochondrial aspartate glutamate carrier 2 ;Solute carrier family 25 member 13;CMC2;	(Human)	7	TNPLEIVKIR	LQVAGEITTG	456	675							CA_BIND (1.);CA_BIND (2.);CA_BIND (3.);REPEAT (Solcar 1.);DOMAIN (EF-hand 1.);DOMAIN (EF-hand 2.);DOMAIN (EF-hand 3.);DOMAIN (EF-hand 4.);TRANSMEM (Helical; Name=1; (Potential).);TRANSMEM (Helical; Name=2; (Potential).);TRANSMEM (Helical; Name=3; (Potential).);INIT_MET (Removed.);MOD_RES (N-acetylalanine.);MOD_RES (N6-acetyllysine (By similarity).)	REPEAT (Solcar 2.);CHAIN (Calcium-binding mitochondrial carrier protein Aralar2.)	REPEAT (Solcar 3.);TRANSMEM (Helical; Name=4; (Potential).);TRANSMEM (Helical; Name=5; (Potential).);TRANSMEM (Helical; Name=6; (Potential).);MOD_RES (N6-acetyllysine; alternate (By similarity).);MOD_RES (N6-succinyllysine; alternate (By similarity).);MOD_RES (N6-succinyllysine (By similarity).);MOD_RES (N6-acetyllysine (By similarity).)			-145
Q9UJS0	MTLADIER	YES	Calcium-binding mitochondrial carrier protein Aralar2	SLC25A13;Calcium-binding mitochondrial carrier protein Aralar2;Citrin ;Mitochondrial aspartate glutamate carrier 2 ;Solute carrier family 25 member 13;CMC2;	(Human)	7	LADLYEPRGR	MTLADIERIA	285	675							CA_BIND (1.);CA_BIND (2.);CA_BIND (3.);DOMAIN (EF-hand 1.);DOMAIN (EF-hand 2.);DOMAIN (EF-hand 3.);DOMAIN (EF-hand 4.);INIT_MET (Removed.);MOD_RES (N-acetylalanine.)	CHAIN (Calcium-binding mitochondrial carrier protein Aralar2.)	REPEAT (Solcar 1.);REPEAT (Solcar 2.);REPEAT (Solcar 3.);TRANSMEM (Helical; Name=1; (Potential).);TRANSMEM (Helical; Name=2; (Potential).);TRANSMEM (Helical; Name=3; (Potential).);TRANSMEM (Helical; Name=4; (Potential).);TRANSMEM (Helical; Name=5; (Potential).);TRANSMEM (Helical; Name=6; (Potential).);MOD_RES (N6-acetyllysine (By similarity).);MOD_RES (N6-acetyllysine; alternate (By similarity).)…			-316
Q9UJS0	PVLLQVAESAYR	YES	Calcium-binding mitochondrial carrier protein Aralar2	SLC25A13;Calcium-binding mitochondrial carrier protein Aralar2;Citrin ;Mitochondrial aspartate glutamate carrier 2 ;Solute carrier family 25 member 13;CMC2;	(Human)	7	RQKASGDSAR	PVLLQVAESA	320	675							CA_BIND (1.);CA_BIND (2.);CA_BIND (3.);DOMAIN (EF-hand 1.);DOMAIN (EF-hand 2.);DOMAIN (EF-hand 3.);DOMAIN (EF-hand 4.);INIT_MET (Removed.);MOD_RES (N-acetylalanine.)	CHAIN (Calcium-binding mitochondrial carrier protein Aralar2.)	REPEAT (Solcar 1.);REPEAT (Solcar 2.);REPEAT (Solcar 3.);TRANSMEM (Helical; Name=1; (Potential).);TRANSMEM (Helical; Name=2; (Potential).);TRANSMEM (Helical; Name=3; (Potential).);TRANSMEM (Helical; Name=4; (Potential).);TRANSMEM (Helical; Name=5; (Potential).);TRANSMEM (Helical; Name=6; (Potential).);MOD_RES (N6-acetyllysine (By similarity).);MOD_RES (N6-acetyllysine; alternate (By similarity).)…			-281
Q9UJZ1	ATVLESEGTR	YES	Stomatin-like protein 2, mitochondrial	STOML2;Stomatin-like protein 2, mitochondrial;EPB72-like protein 2 ;Paraprotein target 7 Short=Paratarg-7;STML2;	(Human)	9	MQVEAERRKR	ATVLESEGTR	202	356							MOD_RES (Phosphoserine; by PKC/PRKCZ.);MOD_RES (Phosphotyrosine.);MOD_RES (N6-acetyllysine; alternate.);MOD_RES (N6-succinyllysine; alternate (By similarity).);TRANSIT (Mitochondrion (Probable).)	CHAIN (Stomatin-like protein 2, mitochondrial.)	MOD_RES (N6-acetyllysine.);COILED (Potential.)				173
Q9Y2R9	SRYSPEFKDPLIDKEYYR	YES	28S ribosomal protein S7, mitochondrial	MRPS7;28S ribosomal protein S7, mitochondrial;bMRP-27a Short=bMRP27a;RT07;	(Human)	17	QLPGLTQVRW	SRYSPEFKDP	35	242	X	X						TRANSIT (Mitochondrion (Potential).)	MOD_RES (N6-acetyllysine.);CHAIN (28S ribosomal protein S7, mitochondrial.)				-3
Q9Y2Z4	AHSGAQGLLAAQKAR	YES	Tyrosine--tRNA ligase, mitochondrial	YARS2;Tyrosine--tRNA ligase, mitochondrial;Tyrosyl-tRNA synthetase Short=TyrRS;SYYM;	(Human)	12	SVLLPLGLRK	AHSGAQGLLA	31	477					Subtiligase Based Positive Selection;unknown		TRANSIT (Mitochondrion (Potential).)	CHAIN (Tyrosine--tRNA ligase, mitochondrial.)	MOD_RES (N6-acetyllysine.);MOD_RES (N6-acetyllysine (By similarity).);MOTIF ("HIGH" region.);MOTIF ("KMSKS" region.);BINDING (ATP (By similarity).)				14
Q9Y375	SSSLQKPVASPGKASSQR	YES	Complex I intermediate-associated protein 30, mitochondrial	NDUFAF1;Complex I intermediate-associated protein 30, mitochondrial;NADH dehydrogenase [ubiquinone] 1 alpha subcomplex assembly factor 1;CIA30;	(Human)	15	PFLGIRFAEY	SSSLQKPVAS	36	327					unknown;Subtiligase Based Positive Selection		TRANSIT (Mitochondrion (Potential).)	CHAIN (Complex I intermediate-associated protein 30, mitochondrial.)					11
Q9Y399	GSATALMIR	YES	28S ribosomal protein S2, mitochondrial	MRPS2;28S ribosomal protein S2, mitochondrial;RT02;	(Human)	9	RPARPSRRTL	GSATALMIRE	42	296					Subtiligase Based Positive Selection;unknown			CHAIN (28S ribosomal protein S2, mitochondrial.)
Q9Y399	LGSATALMIR	YES	28S ribosomal protein S2, mitochondrial	MRPS2;28S ribosomal protein S2, mitochondrial;RT02;	(Human)	9	PRPARPSRRT	LGSATALMIR	41	296					Subtiligase Based Positive Selection;unknown			CHAIN (28S ribosomal protein S2, mitochondrial.)
Q9Y3B8	VREGGAAMAAGESMAQR	YES	Oligoribonuclease, mitochondrial	REXO2;Oligoribonuclease, mitochondrial;RNA exonuclease 2 homolog ;Small fragment nuclease;ORN;	(Human)	11	GSHGRFGARG	VREGGAAMAA	26	237	X	X					TRANSIT (Mitochondrion (Potential).)		MOD_RES (Phosphotyrosine.);MOD_RES (N6-acetyllysine (By similarity).);ACT_SITE (Potential.);DOMAIN (Exonuclease.);CHAIN (Oligoribonuclease, mitochondrial.);MUTAGEN (D->A: Abolishes activity.)				0
