# Supplementary material for: Exploring the Mitochondrial Degradome by the TAILS Proteomics Approach in a Cellular Model of Parkinson’s Disease
Source: Front Aging Neurosci. 2019 Jul 31;11:195. doi: 10.3389/fnagi.2019.00195 (PMC6685049; doi:10.3389/fnagi.2019.00195)
Supplement: Supplementary file 6 [file Table_6.xlsx]

## Sheet: Full_Table
Supplementary Table S6. TopFINDer search of DA-influenced N-term peptides (n=61).
Accession	Input Sequence	Protein found	Recommended Protein Name	Other Names and IDs	Species	Chromosome	P10 to P1	P1' to P10'	P1' Position	Full protein length (aa)	Expected start (pos 1,2, or after signal-, pro-, or transit-peptide)	UniProt curated start	Alternative Spliced Start	Cleaving proteases	Other experimental terminus evidences	Alternative Translation Start	Protease Web Connections	N-terminal Features (Start to P1)	Features spanning terminus (P1 to P1')	C-terminal Features (P1' to End)	Distance To signal peptide	Distance to propeptide lost	Distance to last transmembrane domain (shed)	Distance to transit peptide (mitochondria)
P82673	STAVYSATPVPTPSLPER	YES	28S ribosomal protein S35, mitochondrial	MRPS35;28S ribosomal protein S35, mitochondrial;28S ribosomal protein S28, mitochondrial Short=MRP-S28 Short=S28mt;RT35;	(Human)	12	QSRARTLRAF	STAVYSATPV	23	323					Subtiligase Based Positive Selection;unknown			TRANSIT (Mitochondrion (Potential).)	CHAIN (28S ribosomal protein S35, mitochondrial.)	COILED (Potential.)				22
P21953	VAHFTFQPDPEPR	YES	2-oxoisovalerate dehydrogenase subunit beta, mitochondrial	BCKDHB;2-oxoisovalerate dehydrogenase subunit beta, mitochondrial;Branched-chain alpha-keto acid dehydrogenase E1 component beta chain Short=BCKDE1B Short=BCKDH E1-beta;ODBB;	(Human)	6	TVEDAAQRRQ	VAHFTFQPDP	51	392	X	X			Subtiligase Based Positive Selection			TRANSIT (Mitochondrion.)		CHAIN (2-oxoisovalerate dehydrogenase subunit beta, mitochondrial.);MOD_RES (N6-acetyllysine (By similarity).);MOD_RES (N6-acetyllysine.)				0
Q13405	LSQTQGPPDYPR	YES	39S ribosomal protein L49, mitochondrial	MRPL49;39S ribosomal protein L49, mitochondrial;Neighbor of FAU Short=NOF ;Protein NOF1;RM49;	(Human)	11	GVQRGCGLRL	LSQTQGPPDY	26	166					Subtiligase Based Positive Selection;unknown				CHAIN (39S ribosomal protein L49, mitochondrial.)
Q9NP92	LHTAANAAATATETTCQDVAATPVAR	YES	28S ribosomal protein S30, mitochondrial	MRPS30;28S ribosomal protein S30, mitochondrial;Programmed cell death protein 9;RT30;	(Human)		RPLLRGPRLS	LHTAANAAAT	18	439					Subtiligase Based Positive Selection				CHAIN (28S ribosomal protein S30, mitochondrial.)
P10809	AKDVKFGADAR	YES	60 kDa heat shock protein, mitochondrial	HSPD1;60 kDa heat shock protein, mitochondrial;60 kDa chaperonin ;Chaperonin 60 Short=CPN60 ;Heat shock protein 60 Short=HSP-60 Short=Hsp60 ;HuCHA60 ;Mitochondrial matrix protein P1 ;P60 lymphocyte protein;CH60;	(Human)	2	VLAPHLTRAY	AKDVKFGADA	27	573	X	X			Subtiligase Based Positive Selection			TRANSIT (Mitochondrion.)		MOD_RES (N6-succinyllysine (By similarity).);MOD_RES (Phosphoserine.);MOD_RES (N6-acetyllysine (By similarity).);MOD_RES (N6-acetyllysine; alternate.);MOD_RES (N6-succinyllysine; alternate (By similarity).);MOD_RES (N6-acetyllysine.);MOD_RES (N6-acetyllysine; alternate (By similarity).);MOD_RES (N6-malonyllysine; alternate.);MOD_RES (Phosphoserine (By similarity).);CHAIN (60 kDa heat shock protei…				0
P24752	VSKPTLKEVVIVSATR	YES	Acetyl-CoA acetyltransferase, mitochondrial	ACAT1;Acetyl-CoA acetyltransferase, mitochondrial;Acetoacetyl-CoA thiolase ;T2;THIL;	(Human)	11	QEIRYVERSY	VSKPTLKEVV	34	427	X	X			Subtiligase Based Positive Selection;unknown			TRANSIT (Mitochondrion (By similarity).)		MOD_RES (N6-acetyllysine; alternate (By similarity).);MOD_RES (N6-succinyllysine; alternate (By similarity).);MOD_RES (N6-succinyllysine (By similarity).);MOD_RES (N6-acetyllysine; alternate.);MOD_RES (N6-acetyllysine.);MOD_RES (N6-acetyllysine (By similarity).);ACT_SITE (Acyl-thioester intermediate (Probable).);ACT_SITE (Proton acceptor (Probable).);REGION (Coenzyme A binding.);METAL (Potassium.…				0
O14561	SDMPPLTLEGIQDR	YES	Acyl carrier protein, mitochondrial	NDUFAB1;Acyl carrier protein, mitochondrial;CI-SDAP ;NADH-ubiquinone oxidoreductase 9.6 kDa subunit;ACPM;	(Human)	16	GRVTQLCRQY	SDMPPLTLEG	69	156	X	X	X		Subtiligase Based Positive Selection;unknown			TRANSIT (Mitochondrion.)		MOD_RES (N6-acetyllysine (By similarity).);MOD_RES (O-(pantetheine 4'-phosphoryl)serine (Potential).);CHAIN (Acyl carrier protein, mitochondrial.)				0
Q86TX2	AATLILEPAGR	YES	Acyl-coenzyme A thioesterase 1	ACOT1;Acyl-coenzyme A thioesterase 1;CTE-I ;CTE-Ib ;Inducible cytosolic acyl-coenzyme A thioester hydrolase ;Long chain acyl-CoA thioester hydrolase Short=Long chain acyl-CoA hydrolase;ACOT1;	(Human)	14	M	AATLILEPAG	2	421	X	X			COFRADIC			INIT_MET (Removed.)		ACT_SITE (Charge relay system (By similarity).);CHAIN (Acyl-coenzyme A thioesterase 1.)
P54819	APSVPAAEPEYPKGIR	YES	Adenylate kinase 2, mitochondrial	AK2;Adenylate kinase 2, mitochondrial;ATP-AMP transphosphorylase 2 ;ATP:AMP phosphotransferase ;Adenylate monophosphate kinase;KAD2;	(Human)	1	M	APSVPAAEPE	2	239	X	X			COFRADIC;Subtiligase Based Positive Selection;unknown			MOD_RES (N-acetylmethionine.);INIT_MET (Removed; alternate.)	CHAIN (Adenylate kinase 2, mitochondrial.)	DISULFID ();CHAIN (Adenylate kinase 2, mitochondrial, N- terminally processed.);MOD_RES (N6-succinyllysine (By similarity).);MOD_RES (N6-acetyllysine (By similarity).);REGION (NMPbind.);REGION (LID.);NP_BIND (ATP.);NP_BIND (AMP (By similarity).);BINDING (AMP (By similarity).);BINDING (ATP.);BINDING (ATP (By similarity).);BINDING (AMP.);BINDING (ATP; via carbonyl oxygen.)
P54819	SVPAAEPEYPKGIR	YES	Adenylate kinase 2, mitochondrial	AK2;Adenylate kinase 2, mitochondrial;ATP-AMP transphosphorylase 2 ;ATP:AMP phosphotransferase ;Adenylate monophosphate kinase;KAD2;	(Human)	1	MAP	SVPAAEPEYP	4	239		X		MEP1B;MEP1A	COFRADIC;Subtiligase Based Positive Selection;unknown			MOD_RES (N-acetylmethionine.);INIT_MET (Removed; alternate.)	CHAIN (Adenylate kinase 2, mitochondrial.);CHAIN (Adenylate kinase 2, mitochondrial, N- terminally processed.)	DISULFID ();MOD_RES (N6-succinyllysine (By similarity).);MOD_RES (N6-acetyllysine (By similarity).);REGION (NMPbind.);REGION (LID.);NP_BIND (ATP.);NP_BIND (AMP (By similarity).);BINDING (AMP (By similarity).);BINDING (ATP.);BINDING (ATP (By similarity).);BINDING (AMP.);BINDING (ATP; via carbonyl oxygen.)
P05141	LAADVGKAGAER	YES	ADP/ATP translocase 2	SLC25A5;ADP/ATP translocase 2;ADP,ATP carrier protein 2 ;ADP,ATP carrier protein, fibroblast isoform ;Adenine nucleotide translocator 2 Short=ANT 2 ;Solute carrier family 25 member 5;ADT2;	(Human)	X	VYPLDFARTR	LAADVGKAGA	141	298					Subtiligase Based Positive Selection			REPEAT (Solcar 1.);TRANSMEM (Helical; Name=1; (By similarity).);TRANSMEM (Helical; Name=2; (By similarity).);INIT_MET (Removed; alternate.);MOD_RES (N-acetylmethionine.);MOD_RES (N-acetylthreonine; in ADP/ATP translocase 2, N-terminally processed.);MOD_RES (N6-malonyllysine.);MOD_RES (N6-succinyllysine (By similarity).);MOD_RES (N6,N6-dimethyllysine; alternate.);MOD_RES (N6-methyllysine; alternat…	REPEAT (Solcar 2.);TRANSMEM (Helical; Name=3; (By similarity).);CHAIN (ADP/ATP translocase 2.);CHAIN (ADP/ATP translocase 2, N-terminally processed.)	MOTIF (Substrate recognition (By similarity).);REPEAT (Solcar 3.);TRANSMEM (Helical; Name=4; (By similarity).);TRANSMEM (Helical; Name=5; (By similarity).);TRANSMEM (Helical; Name=6; (By similarity).);MOD_RES (N6-acetyllysine; alternate (By similarity).);MOD_RES (N6-malonyllysine; alternate.);MOD_RES (N6-succinyllysine; alternate (By similarity).);MOD_RES (N6-acetyllysine.);MOD_RES (N6-acetyllysi…			101
P05141	GNLANVIR	YES	ADP/ATP translocase 2	SLC25A5;ADP/ATP translocase 2;ADP,ATP carrier protein 2 ;ADP,ATP carrier protein, fibroblast isoform ;Adenine nucleotide translocator 2 Short=ANT 2 ;Solute carrier family 25 member 5;ADT2;	(Human)	X	KEQGVLSFWR	GNLANVIRYF	73	298								TRANSMEM (Helical; Name=1; (By similarity).);INIT_MET (Removed; alternate.);MOD_RES (N-acetylmethionine.);MOD_RES (N-acetylthreonine; in ADP/ATP translocase 2, N-terminally processed.);MOD_RES (N6-malonyllysine.);MOD_RES (N6-succinyllysine (By similarity).);MOD_RES (N6,N6-dimethyllysine; alternate.);MOD_RES (N6-methyllysine; alternate.)	REPEAT (Solcar 1.);CHAIN (ADP/ATP translocase 2.);CHAIN (ADP/ATP translocase 2, N-terminally processed.)	MOTIF (Substrate recognition (By similarity).);REPEAT (Solcar 2.);REPEAT (Solcar 3.);TRANSMEM (Helical; Name=2; (By similarity).);TRANSMEM (Helical; Name=3; (By similarity).);TRANSMEM (Helical; Name=4; (By similarity).);TRANSMEM (Helical; Name=5; (By similarity).);TRANSMEM (Helical; Name=6; (By similarity).);MOD_RES (N6-malonyllysine.);MOD_RES (N6-acetyllysine; alternate.);MOD_RES (N6-succinyllys…			33
P12236	LAADVGKSGTER	YES	ADP/ATP translocase 3	SLC25A6;ADP/ATP translocase 3;ADP,ATP carrier protein 3 ;ADP,ATP carrier protein, isoform T2 Short=ANT 2 ;Adenine nucleotide translocator 3 Short=ANT 3 ;Solute carrier family 25 member 6;ADT3;	(Human)	X	VYPLDFARTR	LAADVGKSGT	141	298								REPEAT (Solcar 1.);TRANSMEM (Helical; Name=1; (By similarity).);TRANSMEM (Helical; Name=2; (By similarity).);INIT_MET (Removed; alternate.);MOD_RES (N-acetylmethionine.);MOD_RES (N-acetylthreonine; in ADP/ATP translocase 3, N-terminally processed.);MOD_RES (N6-acetyllysine.);BINDING (Nucleotide (By similarity).)	REPEAT (Solcar 2.);TRANSMEM (Helical; Name=3; (By similarity).);CHAIN (ADP/ATP translocase 3.);CHAIN (ADP/ATP translocase 3, N-terminally processed.)	MOTIF (Substrate recognition (By similarity).);REPEAT (Solcar 3.);TRANSMEM (Helical; Name=4; (By similarity).);TRANSMEM (Helical; Name=5; (By similarity).);TRANSMEM (Helical; Name=6; (By similarity).);MOD_RES (N6-acetyllysine.)			101
P25705	QKTGTAEMSSILEER	YES	ATP synthase subunit alpha, mitochondrial	ATP5A1;ATP synthase subunit alpha, mitochondrial;ATPA;	(Human)	18	RNFHASNTHL	QKTGTAEMSS	44	553	X	X			Subtiligase Based Positive Selection;unknown			TRANSIT (Mitochondrion.)		NP_BIND (ATP (By similarity).);SITE (Required for activity (By similarity).);MOD_RES (Pyrrolidone carboxylic acid (By similarity).);MOD_RES (Phosphoserine (By similarity).);MOD_RES (N6-acetyllysine (By similarity).);MOD_RES (N6-acetyllysine; alternate.);MOD_RES (N6-succinyllysine; alternate (By similarity).);MOD_RES (Phosphoserine.);MOD_RES (N6-acetyllysine; alternate (By similarity).);MOD_RES (N…				0
P06576	AQTSPSPKAGAATGR	YES	ATP synthase subunit beta, mitochondrial	ATP5B;ATP synthase subunit beta, mitochondrial;ATPB;	(Human)	12	TAVHPVRDYA	AQTSPSPKAG	48	529	X	X			Subtiligase Based Positive Selection;unknown			TRANSIT (Mitochondrion.)		NP_BIND (ATP (By similarity).);MOD_RES (N6-acetyllysine; alternate (By similarity).);MOD_RES (N6-succinyllysine; alternate (By similarity).);MOD_RES (N6-acetyllysine; alternate.);MOD_RES (N6-acetyllysine.);MOD_RES (N6-acetyllysine (By similarity).);MOD_RES (Phosphoserine (By similarity).);CHAIN (ATP synthase subunit beta, mitochondrial.)				0
Q9H078	YSKSPSNKDAALLEAAR	YES	Caseinolytic peptidase B protein homolog	CLPB;Caseinolytic peptidase B protein homolog;Suppressor of potassium transport defect 3;CLPB;	(Human)	11	ALAAALVVHC	YSKSPSNKDA	127	707					Subtiligase Based Positive Selection				CHAIN (Caseinolytic peptidase B protein homolog.)	NP_BIND (ATP (Potential).);REPEAT (ANK 1.);REPEAT (ANK 2.);REPEAT (ANK 3.);REPEAT (ANK 4.);MOD_RES (N6-acetyllysine.)
Q13740	TVNSLNVSANEN	no
P47985	SHTDIKVPDFSEYR	YES	Cytochrome b-c1 complex subunit Rieske, mitochondrial	UQCRFS1;Cytochrome b-c1 complex subunit Rieske, mitochondrial;Complex III subunit 5 ;Cytochrome b-c1 complex subunit 5 ;Rieske iron-sulfur protein Short=RISP ;Ubiquinol-cytochrome c reductase iron-sulfur subunit;UCRI;	(Human)	19	GLNVPASVCY	SHTDIKVPDF	79	274	X	X			unknown			TRANSIT (Mitochondrion.);CHAIN (Cytochrome b-c1 complex subunit 11 (By similarity).)		DOMAIN (Rieske.);METAL (Iron-sulfur (2Fe-2S) (By similarity).);METAL (Iron-sulfur (2Fe-2S); via pros nitrogen (By similarity).);TRANSMEM (Helical; (By similarity).);DISULFID (By similarity.);CHAIN (Cytochrome b-c1 complex subunit Rieske, mitochondrial.)			-62	0
P20674	SHGSQETDEEFDAR	YES	Cytochrome c oxidase subunit 5A, mitochondrial	COX5A;Cytochrome c oxidase subunit 5A, mitochondrial;Cytochrome c oxidase polypeptide Va;COX5A;	(Human)	15	AVAIQSVRCY	SHGSQETDEE	42	150	X	X			Subtiligase Based Positive Selection;unknown			TRANSIT (Mitochondrion.)		MOD_RES (N6-acetyllysine (By similarity).);CHAIN (Cytochrome c oxidase subunit 5A, mitochondrial.)				0
P09669	MAPEVLPKPR	YES	Cytochrome c oxidase subunit 6C	COX6C;Cytochrome c oxidase subunit 6C;Cytochrome c oxidase polypeptide VIc;COX6C;	(Human)	8		MAPEVLPKPR	1	75	X	X			Subtiligase Based Positive Selection;unknown;COFRADIC					TOPO_DOM (Mitochondrial matrix (By similarity).);TOPO_DOM (Mitochondrial intermembrane (By similarity).);TRANSMEM (Helical; (By similarity).);CHAIN (Cytochrome c oxidase subunit 6C.)			-54
P09669	APEVLPKPR	YES	Cytochrome c oxidase subunit 6C	COX6C;Cytochrome c oxidase subunit 6C;Cytochrome c oxidase polypeptide VIc;COX6C;	(Human)	8	M	APEVLPKPRM	2	75	X	X			Subtiligase Based Positive Selection;unknown;COFRADIC				TOPO_DOM (Mitochondrial matrix (By similarity).);CHAIN (Cytochrome c oxidase subunit 6C.)	TOPO_DOM (Mitochondrial intermembrane (By similarity).);TRANSMEM (Helical; (By similarity).)			-53
P36957	DDLVTVKTPAFAESVTEGDVR	YES	Dihydrolipoyllysine-residue succinyltransferase component of 2-oxoglutarate dehydrogenase complex, mitochondrial	DLST;Dihydrolipoyllysine-residue succinyltransferase component of 2-oxoglutarate dehydrogenase complex, mitochondrial;2-oxoglutarate dehydrogenase complex component E2 Short=OGDC-E2 ;Dihydrolipoamide succinyltransferase component of 2-oxoglutarate dehydrogenase complex ;E2K;ODO2;	(Human)	14	RFFRTTAVCK	DDLVTVKTPA	68	453	X	X						TRANSIT (Mitochondrion.)		CHAIN (Dihydrolipoyllysine-residue succinyltransferase component of 2- oxoglutarate dehydrogenase complex, mitochondrial.);MOD_RES (N6-lipoyllysine (Potential).);MOD_RES (N6-acetyllysine (By similarity).);ACT_SITE (Potential.);DOMAIN (Lipoyl-binding.)				0
P04843	SSEAPPLINEDVKR	YES	Dolichyl-diphosphooligosaccharide--protein glycosyltransferase subunit 1	RPN1;Dolichyl-diphosphooligosaccharide--protein glycosyltransferase subunit 1;Dolichyl-diphosphooligosaccharide--protein glycosyltransferase 67 kDa subunit ;Ribophorin I Short=RPN-I ;Ribophorin-1;RPN1;	(Human)	3	GTWAPAPGSA	SSEAPPLINE	25	607	X	X			unknown;Subtiligase Based Positive Selection			SIGNAL ()	CHAIN (Dolichyl-diphosphooligosaccharide-- protein glycosyltransferase subunit 1.);TOPO_DOM (Lumenal (Potential).)	MOD_RES (N6-acetyllysine.);MOD_RES (N6-acetyllysine (By similarity).);TOPO_DOM (Cytoplasmic (Potential).);CARBOHYD (N-linked (GlcNAc...).);TRANSMEM (Helical; (Potential).)	1		-433
P61803	SASVVSVISR	YES	Dolichyl-diphosphooligosaccharide--protein glycosyltransferase subunit DAD1	DAD1;Dolichyl-diphosphooligosaccharide--protein glycosyltransferase subunit DAD1;Defender against cell death 1 Short=DAD-1;DAD1;	(Human)	14	M	SASVVSVISR	2	113	X	X			COFRADIC;other			INIT_MET (Removed.)		TOPO_DOM (Cytoplasmic (Potential).);TOPO_DOM (Lumenal (Potential).);CHAIN (Dolichyl-diphosphooligosaccharide-- protein glycosyltransferase subunit DAD1.);TRANSMEM (Helical; (Potential).);MOD_RES (N-acetylserine.)			-72
Q92616	AADTQVSETLKR	YES	Translational activator GCN1	GCN1L1;Translational activator GCN1;GCN1-like protein 1;GCN1L;	(Human)	12	M	AADTQVSETL	2	2671	X	X		GRAB	unknown;Subtiligase Based Positive Selection;COFRADIC;other			INIT_MET (Removed.)		CHAIN (Translational activator GCN1.);MOD_RES (N-acetylalanine.);MOD_RES (Phosphoserine.);REPEAT (HEAT 1.);REPEAT (HEAT 2.);REPEAT (HEAT 3.);REPEAT (HEAT 4.);REPEAT (HEAT 5.);REPEAT (HEAT 6.);REPEAT (HEAT 7.);REPEAT (HEAT 8.);REPEAT (HEAT 9.);REPEAT (HEAT 10.);REPEAT (HEAT 11.);REPEAT (HEAT 12.);REPEAT (HEAT 13.);REPEAT (HEAT 14.);REPEAT (HEAT 15.);REPEAT (HEAT 16.);REPEAT (HEAT 17.);REPEAT (HEAT…
P13639	VNFTVDQIR	YES	Elongation factor 2	EEF2;Elongation factor 2;EF2;	(Human)	19	M	VNFTVDQIRA	2	858	X	X		MAP2	COFRADIC;Subtiligase Based Positive Selection;other;N-TAILS			INIT_MET (Removed.)		CHAIN (Elongation factor 2.);MOD_RES (Phosphothreonine.);MOD_RES (N6-succinyllysine (By similarity).);MOD_RES (N6-acetyllysine.);MOD_RES (N6-acetyllysine; alternate.);MOD_RES (N6-succinyllysine; alternate (By similarity).);MOD_RES (N6-acetyllysine (By similarity).);MOD_RES (Phosphoserine.);MOD_RES (Diphthamide (By similarity).);NP_BIND (GTP (By similarity).)
Q14249	AELPPVPGGPR	YES	Endonuclease G, mitochondrial	ENDOG;Endonuclease G, mitochondrial;NUCG;	(Human)	9	RLPVLPVAAA	AELPPVPGGP	49	297	X	X			Subtiligase Based Positive Selection			TRANSIT (Mitochondrion (By similarity).)		CHAIN (Endonuclease G, mitochondrial.);METAL (Magnesium or manganese; catalytic (By similarity).);ACT_SITE (Proton acceptor (By similarity).)				0
P14625	DDEVDVDGTVEEDLGKSR	YES	Endoplasmin	HSP90B1;Endoplasmin;94 kDa glucose-regulated protein Short=GRP-94 ;Heat shock protein 90 kDa beta member 1 ;Tumor rejection antigen 1 ;gp96 homolog;ENPL;	(Human)	12	VLLTFGSVRA	DDEVDVDGTV	22	803	X	X			N-TAILS			SIGNAL ()		DISULFID (Interchain (By similarity).);CHAIN (Endoplasmin.);CARBOHYD (N-linked (GlcNAc...).);CARBOHYD (N-linked (GlcNAc...) (Potential).);MOTIF (Prevents secretion from ER.);MOD_RES (Phosphoserine.);MOD_RES (N6-succinyllysine (By similarity).);MOD_RES (N6-acetyllysine (By similarity).);BINDING (ATP (By similarity).);BINDING (ATP; via amide nitrogen (By similarity).)	0
P14625	KEAESSPFVER	YES	Endoplasmin	HSP90B1;Endoplasmin;94 kDa glucose-regulated protein Short=GRP-94 ;Heat shock protein 90 kDa beta member 1 ;Tumor rejection antigen 1 ;gp96 homolog;ENPL;	(Human)	12	KIYFMAGSSR	KEAESSPFVE	547	803								DISULFID (Interchain (By similarity).);SIGNAL ();CARBOHYD (N-linked (GlcNAc...).);CARBOHYD (N-linked (GlcNAc...) (Potential).);MOD_RES (Phosphoserine.);MOD_RES (N6-succinyllysine (By similarity).);MOD_RES (N6-acetyllysine (By similarity).);BINDING (ATP (By similarity).);BINDING (ATP; via amide nitrogen (By similarity).)	CHAIN (Endoplasmin.)	MOTIF (Prevents secretion from ER.);MOD_RES (N6-succinyllysine (By similarity).)	525
P30084	ASGANFEYIIAEKR	YES	Enoyl-CoA hydratase, mitochondrial	ECHS1;Enoyl-CoA hydratase, mitochondrial;Enoyl-CoA hydratase 1 ;Short-chain enoyl-CoA hydratase Short=SCEH;ECHM;	(Human)	10	PVRCPAWRPF	ASGANFEYII	28	290	X	X			Subtiligase Based Positive Selection;unknown			TRANSIT (Mitochondrion.)		CHAIN (Enoyl-CoA hydratase, mitochondrial.);MOD_RES (N6-acetyllysine; alternate (By similarity).);MOD_RES (N6-succinyllysine; alternate (By similarity).);MOD_RES (N6-acetyllysine.);MOD_RES (N6-succinyllysine (By similarity).);MOD_RES (N6-acetyllysine (By similarity).);REGION (Substrate binding.);BINDING (Substrate; via amide nitrogen.);SITE (Important for catalytic activity (By similarity).)				0
Q9NPA0	SEVPGAAAEGSGGSGVGIGDR	YES	ER membrane protein complex subunit 7	EMC7;ER membrane protein complex subunit 7;EMC7;	(Human)	15	LLLLSGDVQS	SEVPGAAAEG	24	242	X	X			Subtiligase Based Positive Selection			SIGNAL (Potential.)		TOPO_DOM (Extracellular (Potential).);TOPO_DOM (Cytoplasmic (Potential).);CHAIN (ER membrane protein complex subunit 7.);TRANSMEM (Helical; (Potential).)	0		-157
Q96HE7	HGEEQPPETAAQR	YES	ERO1-like protein alpha	ERO1L;ERO1-like protein alpha;Endoplasmic oxidoreductin-1-like protein ;Oxidoreductin-1-L-alpha;ERO1A;	(Human)	14	LGAVWLLSSG	HGEEQPPETA	22	468	X	X							SIGNAL ()	DISULFID ();DISULFID (Alternate.);DISULFID (Redox-active; alternate.);DISULFID (Redox-active.);CHAIN (ERO1-like protein alpha.);CARBOHYD (N-linked (GlcNAc...).);CARBOHYD (N-linked (GlcNAc...) (Potential).);MOD_RES (Phosphoserine.);BINDING (FAD.);MUTAGEN (C->A: Alters protein folding and stability. Loss of regulatory disulfide bond formation and increased activity towards P4HB; when associated wit…	-2
Q96HE7	EEQPPETAAQR	YES	ERO1-like protein alpha	ERO1L;ERO1-like protein alpha;Endoplasmic oxidoreductin-1-like protein ;Oxidoreductin-1-L-alpha;ERO1A;	(Human)	14	AVWLLSSGHG	EEQPPETAAQ	24	468	X	X						SIGNAL ()		DISULFID ();DISULFID (Alternate.);DISULFID (Redox-active; alternate.);DISULFID (Redox-active.);CHAIN (ERO1-like protein alpha.);CARBOHYD (N-linked (GlcNAc...).);CARBOHYD (N-linked (GlcNAc...) (Potential).);MOD_RES (Phosphoserine.);BINDING (FAD.);MUTAGEN (C->A: Alters protein folding and stability. Loss of regulatory disulfide bond formation and increased activity towards P4HB; when associated wit…	0
P43304	ADCISEPVNR	YES	Glycerol-3-phosphate dehydrogenase, mitochondrial	GPD2;Glycerol-3-phosphate dehydrogenase, mitochondrial;mtGPD;GPDM;	(Human)	2	KQMNLAYVKA	ADCISEPVNR	43	727	X	X						TRANSIT (Mitochondrion (By similarity).)		CHAIN (Glycerol-3-phosphate dehydrogenase, mitochondrial.);MOD_RES (Phosphotyrosine (By similarity).);NP_BIND (FAD (Potential).);DOMAIN (EF-hand 1.);DOMAIN (EF-hand 2.);CA_BIND (Potential.)				0
P50150	MKEGMSNNSTTSISQAR	YES	Guanine nucleotide-binding protein G(I)/G(S)/G(O) subunit gamma-4	GNG4;Guanine nucleotide-binding protein G(I)/G(S)/G(O) subunit gamma-4;GBG4;	(Human)	1		MKEGMSNNST	1	75	X	X								CHAIN (Guanine nucleotide-binding protein G(I)/G(S)/G(O) subunit gamma-4.);MOD_RES (Cysteine methyl ester.);LIPID (S-geranylgeranyl cysteine.);PROPEP (Removed in mature form.)		-75
Q969P0	STLQEVVGIR	YES	Immunoglobulin superfamily member 8	IGSF8;Immunoglobulin superfamily member 8;CD81 partner 3 ;Glu-Trp-Ile EWI motif-containing protein 2 Short=EWI-2 ;Keratinocytes-associated transmembrane protein 4 Short=KCT-4 ;LIR-D1 ;Prostaglandin regulatory-like protein Short=PGRL ;IGSF8;	(Human)	1	RSVPEAPVGR	STLQEVVGIR	214	613								DISULFID (By similarity.);SIGNAL ();CARBOHYD (N-linked (GlcNAc...) (Potential).);DOMAIN (Ig-like C2-type 1.)	DISULFID (By similarity.);TOPO_DOM (Extracellular (Potential).);CHAIN (Immunoglobulin superfamily member 8.);DOMAIN (Ig-like C2-type 2.)	DISULFID (By similarity.);TOPO_DOM (Cytoplasmic (Potential).);CARBOHYD (N-linked (GlcNAc...).);TRANSMEM (Helical; (Potential).);MOTIF (EWI motif.);LIPID (S-palmitoyl cysteine (By similarity).);DOMAIN (Ig-like C2-type 3.);DOMAIN (Ig-like C2-type 4.)	186		-387
P08069	EICGPGIDIR	YES	Insulin-like growth factor 1 receptor	IGF1R;Insulin-like growth factor 1 receptor;Insulin-like growth factor I receptor Short=IGF-I receptor ;IGF1R;	(Human)	15	AALSLWPTSG	EICGPGIDIR	31	1367	X	X						SIGNAL ()		DISULFID ();TOPO_DOM (Extracellular (Potential).);TOPO_DOM (Cytoplasmic (Potential).);CHAIN (Insulin-like growth factor 1 receptor alpha chain.);CHAIN (Insulin-like growth factor 1 receptor beta chain.);CARBOHYD (N-linked (GlcNAc...).);CARBOHYD (N-linked (GlcNAc...) (Potential).);TRANSMEM (Helical; (Potential).);MOTIF (IRS1- and SHC1-binding.);MOD_RES (Phosphotyrosine.);MOD_RES (Phosphotyrosine; …	0		-929
Q7Z4H8	GAPEVLVSAPR	YES	KDEL motif-containing protein 2	KDELC2;KDEL motif-containing protein 2;KDEL2;	(Human)	11	QLRLALLVAA	GAPEVLVSAP	21	507	X	X			Subtiligase Based Positive Selection			SIGNAL (Potential.)		CHAIN (KDEL motif-containing protein 2.);CARBOHYD (N-linked (GlcNAc...).);MOTIF (Prevents secretion from ER (Potential).);REPEAT (Filamin.)	0
P42704	AIAAKEKDIQEESTFSSR	YES	Leucine-rich PPR motif-containing protein, mitochondrial	LRPPRC;Leucine-rich PPR motif-containing protein, mitochondrial;130 kDa leucine-rich protein Short=LRP 130 ;GP130;LPPRC;	(Human)	2	GGLLSPARLY	AIAAKEKDIQ	60	1394	X	X			unknown;Subtiligase Based Positive Selection			TRANSIT (Mitochondrion (Potential).)		CHAIN (Leucine-rich PPR motif-containing protein, mitochondrial.);MOD_RES (N6-acetyllysine.);MOD_RES (N6-acetyllysine (By similarity).);REGION (RNA-binding.);REPEAT (PPR 1.);REPEAT (PPR 2.);REPEAT (PPR 3.);REPEAT (PPR 4.);REPEAT (PPR 5.);REPEAT (PPR 6.);REPEAT (PPR 7.);REPEAT (PPR 8.);REPEAT (PPR 9.);REPEAT (PPR 10.);REPEAT (PPR 11.);REPEAT (PPR 12.);REPEAT (PPR 13.);REPEAT (PPR 14.);REPEAT (PPR …				0
P55145	LRPGDCEVCISYLGR	YES	Mesencephalic astrocyte-derived neurotrophic factor	MANF;Mesencephalic astrocyte-derived neurotrophic factor;Arginine-rich protein ;Protein ARMET;MANF;	(Human)	3	ALSVLPGSRA	LRPGDCEVCI	25	182	X	X						SIGNAL ()		DISULFID ();CHAIN (Mesencephalic astrocyte-derived neurotrophic factor.);MOD_RES (Phosphotyrosine (By similarity).)	0
O75439	STQAATQVVLNVPETR	YES	Mitochondrial-processing peptidase subunit beta	PMPCB;Mitochondrial-processing peptidase subunit beta;Beta-MPP ;P-52;MPPB;M16.003	(Human)	7	SLYFGENRLR	STQAATQVVL	44	489	X	X			unknown;Subtiligase Based Positive Selection				TRANSIT (Mitochondrion.)	CHAIN (Mitochondrial-processing peptidase subunit beta.);METAL (Zinc (By similarity).);ACT_SITE (Proton acceptor (By similarity).)				-2
O75251	VHQSVATDGPSSTQPALPKAR	YES	NADH dehydrogenase [ubiquinone] iron-sulfur protein 7, mitochondrial	NDUFS7;NADH dehydrogenase [ubiquinone] iron-sulfur protein 7, mitochondrial;Complex I-20kD Short=CI-20kD ;NADH-ubiquinone oxidoreductase 20 kDa subunit ;PSST subunit;NDUS7;	(Human)	19	SVGPAVQARG	VHQSVATDGP	30	213					Subtiligase Based Positive Selection;unknown				TRANSIT (Mitochondrion (By similarity).)	CHAIN (NADH dehydrogenase [ubiquinone] iron- sulfur protein 7, mitochondrial.);METAL (Iron-sulfur (4Fe-4S) (Potential).)				-9
Q96AY3	RASPAGGPLEDVVIER	YES	Peptidyl-prolyl cis-trans isomerase FKBP10	FKBP10;Peptidyl-prolyl cis-trans isomerase FKBP10;65 kDa FK506-binding protein Short=65 kDa FKBP Short=FKBP-65 ;FK506-binding protein 10 Short=FKBP-10 ;Immunophilin FKBP65 ;Rotamase;FKB10;	(Human)	17	VVQAVGRGLG	RASPAGGPLE	33	582								SIGNAL (Potential.)	CHAIN (Peptidyl-prolyl cis-trans isomerase FKBP10.)	CARBOHYD (N-linked (GlcNAc...) (Potential).);CARBOHYD (N-linked (GlcNAc...).);MOTIF (Prevents secretion from ER (Potential).);DOMAIN (PPIase FKBP-type 1.);DOMAIN (PPIase FKBP-type 2.);DOMAIN (PPIase FKBP-type 3.);DOMAIN (PPIase FKBP-type 4.);DOMAIN (EF-hand 1.);DOMAIN (EF-hand 2.);CA_BIND (1 (Potential).);CA_BIND (2 (Potential).)	6
P62942	GVQVETISPGDGR	YES	Peptidyl-prolyl cis-trans isomerase FKBP1A	FKBP1A;Peptidyl-prolyl cis-trans isomerase FKBP1A;12 kDa FK506-binding protein Short=12 kDa FKBP Short=FKBP-12 ;Calstabin-1 ;FK506-binding protein 1A Short=FKBP-1A ;Immunophilin FKBP12 ;Rotamase;FKB1A;	(Human)	20	M	GVQVETISPG	2	108	X	X			unknown;COFRADIC;Subtiligase Based Positive Selection;N-TAILS			INIT_MET (Removed.)		CHAIN (Peptidyl-prolyl cis-trans isomerase FKBP1A.);MOD_RES (N-acetylglycine.);MOD_RES (Phosphoserine.);MOD_RES (N6-acetyllysine; alternate (By similarity).);MOD_RES (N6-succinyllysine; alternate (By similarity).);DOMAIN (PPIase FKBP-type.)
Q9NVV4	SCPGTVAKDLR	YES	Poly(A) RNA polymerase, mitochondrial	MTPAP;Poly(A) RNA polymerase, mitochondrial;PAP-associated domain-containing protein 1 ;Polynucleotide adenylyltransferase ;Terminal uridylyltransferase 1 Short=TUTase 1 ;mtPAP;PAPD1;	(Human)	10	RVQRPIVRLL	SCPGTVAKDL	31	582					unknown				TRANSIT (Mitochondrion (Potential).)	MOD_RES (N6-acetyllysine.);NP_BIND (ATP (Potential).);METAL (Magnesium or manganese; catalytic (By similarity).);DOMAIN (PAP-associated.);CHAIN (Poly(A) RNA polymerase, mitochondrial.);MUTAGEN (YF->AA: Reduces dimerization.);MUTAGEN (F->A: Reduced enzyme activity.);MUTAGEN (HKI->AAA: No effect on dimerization. Loss of dimerization and of enzyme activity; when associated with 294-AAAA-297.);MUTAGE…				-7
P07237	DAPEEEDHVLVLR	YES	Protein disulfide-isomerase	P4HB;Protein disulfide-isomerase;Cellular thyroid hormone-binding protein ;Prolyl 4-hydroxylase subunit beta ;p55;PDIA1;	(Human)	17	CLAVAALVRA	DAPEEEDHVL	18	508	X	X			unknown;Subtiligase Based Positive Selection;N-TAILS			SIGNAL ()		MOD_RES (N6-acetyllysine (By similarity).);MOD_RES (N6-succinyllysine (By similarity).);ACT_SITE (Nucleophile.);ACT_SITE (Nucleophile (By similarity).);DISULFID (Redox-active.);DISULFID (Redox-active (By similarity).);DOMAIN (Thioredoxin 1.);DOMAIN (Thioredoxin 2.);MOTIF (Prevents secretion from ER.);CHAIN (Protein disulfide-isomerase.);SITE (Contributes to redox potential value.);SITE (Lowers pK…	0
P30101	SDVLELTDDNFESR	YES	Protein disulfide-isomerase A3	PDIA3;Protein disulfide-isomerase A3;58 kDa glucose-regulated protein ;58 kDa microsomal protein Short=p58 ;Disulfide isomerase ER-60 ;Endoplasmic reticulum resident protein 57 Short=ER protein 57 Short=ERp57 ;Endoplasmic reticulum resident protein 60 Short=ER protein 60 Short=ERp60;PDIA3;	(Human)	15	LLAAARLAAA	SDVLELTDDN	25	505	X	X			Subtiligase Based Positive Selection;N-TAILS			SIGNAL ()		MOD_RES (N6-succinyllysine (By similarity).);MOD_RES (N6-acetyllysine (By similarity).);ACT_SITE (Nucleophile (By similarity).);DISULFID (Redox-active; alternate (By similarity).);DISULFID (Interchain (with C-115 in TAPBP); alternate.);DISULFID ();DISULFID (Redox-active (By similarity).);DOMAIN (Thioredoxin 1.);DOMAIN (Thioredoxin 2.);MOTIF (Prevents secretion from ER (By similarity).);CHAIN (Pro…	0
P49257	DGVGGDPAVALPHR	YES	Protein ERGIC-53	LMAN1;Protein ERGIC-53;ER-Golgi intermediate compartment 53 kDa protein ;Gp58 ;Intracellular mannose-specific lectin MR60 ;Lectin mannose-binding 1;LMAN1;	(Human)	18	LLSLGRFVRG	DGVGGDPAVA	31	510	X	X			N-TAILS			SIGNAL ()		DISULFID ();DISULFID (Interchain.);TOPO_DOM (Lumenal (Potential).);TOPO_DOM (Cytoplasmic (Potential).);CHAIN (Protein ERGIC-53.);METAL (Calcium.);METAL (Calcium; via carbonyl oxygen.);TRANSMEM (Helical; (Potential).);MOTIF (ER export motif.);REGION (Carbohydrate binding (By similarity).);BINDING (Carbohydrate (By similarity).);DOMAIN (L-type lectin-like.);SITE (Required for ER export.)	0		-468
P11498	TSTAPAASPNVR	YES	Pyruvate carboxylase, mitochondrial	PC;Pyruvate carboxylase, mitochondrial;Pyruvic carboxylase Short=PCB;PYC;	(Human)	11	GGLRLLGIRR	TSTAPAASPN	19	1178	X	X			Subtiligase Based Positive Selection;unknown				TRANSIT (Mitochondrion (Potential).)	MOD_RES (N6-acetyllysine; alternate (By similarity).);MOD_RES (N6-succinyllysine; alternate (By similarity).);MOD_RES (N6-acetyllysine (By similarity).);MOD_RES (N6-succinyllysine (By similarity).);MOD_RES (N6-carboxylysine.);MOD_RES (N6-acetyllysine.);MOD_RES (N6-biotinyllysine.);ACT_SITE (By similarity.);REGION (Substrate binding.);METAL (Manganese.);METAL (Manganese; via carbamate group.);DOMA…				-2
Q13283	VMEKPSPLLVGR	YES	Ras GTPase-activating protein-binding protein 1	G3BP1;Ras GTPase-activating protein-binding protein 1;ATP-dependent DNA helicase VIII Short=hDH VIII ;GAP SH3 domain-binding protein 1;G3BP1;	(Human)	5	M	VMEKPSPLLV	2	466	X	X			Subtiligase Based Positive Selection;COFRADIC;other			INIT_MET (Removed.)		COMPBIAS (Glu-rich.);COMPBIAS (Gly-rich.);CHAIN (Ras GTPase-activating protein-binding protein 1.);MOD_RES (Phosphothreonine.);MOD_RES (Phosphoserine.);MOD_RES (N6-acetyllysine.);MOD_RES (Dimethylated arginine; alternate.);MOD_RES (Omega-N-methylarginine; alternate.);MOD_RES (Omega-N-methylated arginine; alternate.);DOMAIN (NTF2.);DOMAIN (RRM.);MUTAGEN (S->A: Cytoplasmic; no effect on stress gran…
P37108	VLLESEQFLTELTR	YES	Signal recognition particle 14 kDa protein	SRP14;Signal recognition particle 14 kDa protein;18 kDa Alu RNA-binding protein;SRP14;	(Human)	15	M	VLLESEQFLT	2	136	X	X			COFRADIC;Subtiligase Based Positive Selection;other			INIT_MET (Removed.)		COMPBIAS (Ala/Thr-rich.);CHAIN (Signal recognition particle 14 kDa protein.)
Q04837	ESETTTSLVLER	YES	Single-stranded DNA-binding protein, mitochondrial	SSBP1;Single-stranded DNA-binding protein, mitochondrial;PWP1-interacting protein 17;SSBP;	(Human)	7	LQVLRQFVRH	ESETTTSLVL	17	148	X	X			Subtiligase Based Positive Selection			TRANSIT (Mitochondrion.)		MOD_RES (Phosphoserine.);MOD_RES (N6-acetyllysine.);MOD_RES (N6-succinyllysine (By similarity).);DOMAIN (SSB.);CHAIN (Single-stranded DNA-binding protein, mitochondrial.)				0
Q04837	SETTTSLVLER	YES	Single-stranded DNA-binding protein, mitochondrial	SSBP1;Single-stranded DNA-binding protein, mitochondrial;PWP1-interacting protein 17;SSBP;	(Human)	7	QVLRQFVRHE	SETTTSLVLE	18	148	X	X			Subtiligase Based Positive Selection			TRANSIT (Mitochondrion.)	CHAIN (Single-stranded DNA-binding protein, mitochondrial.)	MOD_RES (Phosphoserine.);MOD_RES (N6-acetyllysine.);MOD_RES (N6-succinyllysine (By similarity).);DOMAIN (SSB.)				1
Q99523	SAPGEDEECGR	YES	Sortilin	SORT1;Sortilin;100 kDa NT receptor ;Glycoprotein 95 Short=Gp95 ;Neurotensin receptor 3 Short=NT3 Short=NTR3;SORT;	(Human)	1	AFPRGGRWRR	SAPGEDEECG	78	831	X	X						PROPEP (Removed in mature form.);REGION (Intrachain binding of the propeptide and the extracellular domain.);SIGNAL (Potential.);MUTAGEN (RWRR->GWRA: Abrogates propeptide cleavage.);MUTAGEN (RR->GG: Abrogates propeptide cleavage.)		MOD_RES (Phosphoserine.);DISULFID ();REGION (Interactions with LRPAP1 and NGFB.);REGION (Golgi to endosome transport and interactions with GGA1 and GGA2.);MOTIF (Endocytosis signal (Probable).);CHAIN (Sortilin.);MUTAGEN (Y->A: Reduces endocytosis and Golgi to endosome sorting; when associated with A- 795.);MUTAGEN (L->A: Reduces endocytosis and Golgi to endosome sorting; when associated with A- 7…	44	0	-701
P18827	NQSPVDQGATGASQGLLDR	YES	Syndecan-1	SDC1;Syndecan-1;SDC1;	(Human)	2	AVVAVEPDRR	NQSPVDQGAT	231	310								SIGNAL (Potential.);CARBOHYD (O-linked (Xyl...) (chondroitin sulfate) (By similarity).);CARBOHYD (N-linked (GlcNAc...) (Potential).);CARBOHYD (O-linked (Xyl...) (heparan sulfate) (By similarity).)	CHAIN (Syndecan-1.);TOPO_DOM (Extracellular (Potential).)	TOPO_DOM (Cytoplasmic (Potential).);TRANSMEM (Helical; (Potential).);SITE (Cleavage (By similarity).)	208		-45
Q99757	TTFNIQDGPDFQDR	YES	Thioredoxin, mitochondrial	TXN2;Thioredoxin, mitochondrial;Thioredoxin-2;THIOM;	(Human)	22	RTIYTTRISL	TTFNIQDGPD	60	166	X	X			Subtiligase Based Positive Selection			TRANSIT (Mitochondrion.)		MOD_RES (N6-acetyllysine; alternate.);MOD_RES (N6-succinyllysine; alternate (By similarity).);ACT_SITE (Nucleophile (By similarity).);DISULFID (Redox-active.);DOMAIN (Thioredoxin.);CHAIN (Thioredoxin, mitochondrial.);SITE (Deprotonates C-terminal active site Cys (By similarity).);SITE (Contributes to redox potential value (By similarity).)				0
Q9BW92	LHTAVVSTPPR	YES	Threonine--tRNA ligase, mitochondrial	TARS2;Threonine--tRNA ligase, mitochondrial;Threonyl-tRNA synthetase Short=ThrRS ;Threonyl-tRNA synthetase-like 1;SYTM;	(Human)	1	LRLQGLQACR	LHTAVVSTPP	20	718					unknown;Subtiligase Based Positive Selection			TRANSIT (Mitochondrion (Potential).)	CHAIN (Threonine--tRNA ligase, mitochondrial.)	MOD_RES (Phosphoserine.)				19
O14773	LHLGVTPSVIR	YES	Tripeptidyl-peptidase 1	TPP1;Tripeptidyl-peptidase 1;Cell growth-inhibiting gene 1 protein ;Lysosomal pepstatin-insensitive protease Short=LPIC ;Tripeptidyl aminopeptidase ;Tripeptidyl-peptidase I Short=TPP-I;TPP1;S53.003	(Human)	11	PEPQVTGTVG	LHLGVTPSVI	196	563	X	X		TPP1	Subtiligase Based Positive Selection;unknown			PROPEP (Removed in mature form.);DISULFID ();SIGNAL ()		ACT_SITE (Charge relay system.);DISULFID ();METAL (Calcium.);METAL (Calcium; via carbonyl oxygen.);DOMAIN (Peptidase S53.);CHAIN (Tripeptidyl-peptidase 1.);MUTAGEN (H->A: No effect.);MUTAGEN (D->A: Inactive. Impaired processing.);MUTAGEN (S->A: Inactive. Impaired processing.);CARBOHYD (N-linked (GlcNAc...).)	176	0
Q6Y1H2	AAVAATAAAKGNGGGGGR	YES	Very-long-chain (3R)-3-hydroxyacyl-[acyl-carrier protein] dehydratase 2	PTPLB;Very-long-chain (3R)-3-hydroxyacyl-[acyl-carrier protein] dehydratase 2;3-hydroxyacyl-CoA dehydratase 2 Short=HACD2 ;Protein-tyrosine phosphatase-like member B;HACD2;	(Human)	3	M	AAVAATAAAK	2	254	X	X			Subtiligase Based Positive Selection			INIT_MET (Removed.)		COMPBIAS (Poly-Gly.);TOPO_DOM (Cytoplasmic (Potential).);TOPO_DOM (Lumenal (Potential).);CHAIN (Very-long-chain (3R)-3-hydroxyacyl-[acyl- carrier protein] dehydratase 2.);CARBOHYD (N-linked (GlcNAc...) (Potential).);TRANSMEM (Helical; (Potential).);MOD_RES (N-acetylalanine.);ACT_SITE (By similarity.)			-96
Q8WY21	GGSCCPSPHPSSAPR	YES	VPS10 domain-containing receptor SorCS1	SORCS1;VPS10 domain-containing receptor SorCS1;SORC1;	(Human)	10	LILCAPGVCG	GGSCCPSPHP	34	1168	X	X						SIGNAL (Potential.)		DOMAIN (PKD.);CHAIN (VPS10 domain-containing receptor SorCS1.);TOPO_DOM (Lumenal (Potential).);TOPO_DOM (Cytoplasmic (Potential).);CARBOHYD (O-linked (GalNAc...).);CARBOHYD (N-linked (GlcNAc...) (Potential).);TRANSMEM (Helical; (Potential).);REPEAT (BNR 1.);REPEAT (BNR 2.);REPEAT (BNR 3.);REPEAT (BNR 4.);REPEAT (BNR 5.)	0		-1087
Q6PML9	STNVQKEGQGSQTLR	YES	Zinc transporter 9	SLC30A9;Zinc transporter 9;Human embryonic lung protein Short=HuEL ;Solute carrier family 30 member 9;ZNT9;	(Human)	4	IGTLSQVKLY	STNVQKEGQG	68	568					Subtiligase Based Positive Selection;unknown				CHAIN (Zinc transporter 9.)	MOTIF (LXXLL motif.);TRANSMEM (Helical; (Potential).)			-377
